# Supplementary material for: Ensemble modeling of black pomfret (Parastromateus niger) habitat in the Taiwan Strait based on oceanographic variables
Source: PeerJ. 2023 Mar 9;11:e14990. doi: 10.7717/peerj.14990 (PMC10008307; doi:10.7717/peerj.14990)
Supplement: Supplemental Information 1 [file peerj-11-14990-s001.xlsx]

## Sheet: Sheet1
CTNO	CT	Date_rev	yr	mon	day	Fishing Code	Species	Area	Kg	Lon	Lat	WorkHour	TotalWorkHour	TotalHour	Catch
'CT4002226'	4	20140218	2014	2	18	1	36009	2	1	121.35	25.4667	0.05	24.45	46.85	0.00204499
'CT4002226'	4	20140218	2014	2	18	1	36009	2	1	121.45	25.55	0.25	24.45	46.85	0.0102249
'CT4002226'	4	20140218	2014	2	18	1	36009	2	1	121.467	25.55	0.85	24.45	46.85	0.0347648
'CT4002226'	4	20140218	2014	2	18	1	36009	2	1	121.483	25.55	0.85	24.45	46.85	0.0347648
'CT4002226'	4	20140218	2014	2	18	1	36009	2	1	121.5	25.55	0.75	24.45	46.85	0.0306748
'CT4002226'	4	20140218	2014	2	18	1	36009	2	1	121.517	25.55	0.35	24.45	46.85	0.0143149
'CT4002226'	4	20140218	2014	2	18	1	36009	2	1	121.517	25.5667	0.45	24.45	46.85	0.0184049
'CT4002226'	4	20140218	2014	2	18	1	36009	2	1	121.533	25.5667	0.25	24.45	46.85	0.0102249
'CT4002226'	4	20140218	2014	2	18	1	36009	2	1	121.533	25.55	0.55	24.45	46.85	0.0224949
'CT4002226'	4	20140218	2014	2	18	1	36009	2	1	121.55	25.55	0.8	24.45	46.85	0.0327198
'CT4002226'	4	20140218	2014	2	18	1	36009	2	1	121.567	25.55	0.8	24.45	46.85	0.0327198
'CT4002226'	4	20140218	2014	2	18	1	36009	2	1	121.583	25.55	0.35	24.45	46.85	0.0143149
'CT4002226'	4	20140218	2014	2	18	1	36009	2	1	121.6	25.65	0.5	24.45	46.85	0.0204499
'CT4002226'	4	20140218	2014	2	18	1	36009	2	1	121.6	25.6667	1.3	24.45	46.85	0.0531697
'CT4002226'	4	20140218	2014	2	18	1	36009	2	1	121.6	25.6833	1.85	24.45	46.85	0.0756646
'CT4002226'	4	20140218	2014	2	18	1	36009	2	1	121.6	25.7	1.9	24.45	46.85	0.0777096
'CT4002226'	4	20140218	2014	2	18	1	36009	2	1	121.6	25.7167	1.75	24.45	46.85	0.0715746
'CT4002226'	4	20140218	2014	2	18	1	36009	2	1	121.6	25.7333	1.9	24.45	46.85	0.0777096
'CT4002226'	4	20140218	2014	2	18	1	36009	2	1	121.6	25.75	1.95	24.45	46.85	0.0797546
'CT4002226'	4	20140218	2014	2	18	1	36009	2	1	121.6	25.7667	1.85	24.45	46.85	0.0756646
'CT4002226'	4	20140218	2014	2	18	1	36009	2	1	121.6	25.7833	1.2	24.45	46.85	0.0490798
'CT4002226'	4	20140218	2014	2	18	1	36009	2	1	121.617	25.7333	0.1	24.45	46.85	0.00408998
'CT4002226'	4	20140218	2014	2	18	1	36009	2	1	121.617	25.7167	0.2	24.45	46.85	0.00817996
'CT4002226'	4	20140218	2014	2	18	1	36009	2	1	121.617	25.6833	0.05	24.45	46.85	0.00204499
'CT4002226'	4	20140218	2014	2	18	1	36009	2	1	121.617	25.7833	0.15	24.45	46.85	0.00613497
'CT4002226'	4	20140218	2014	2	18	1	36009	2	1	121.617	25.6667	0.45	24.45	46.85	0.0184049
'CT4002226'	4	20140218	2014	2	18	1	36009	2	1	121.617	25.65	0.45	24.45	46.85	0.0184049
'CT4002226'	4	20140218	2014	2	18	1	36009	2	1	121.6	25.8	0.05	24.45	46.85	0.00204499
'CT4002226'	4	20140218	2014	2	18	1	36009	2	1	121.617	25.7	0.15	24.45	46.85	0.00613497
'CT4002226'	4	20140218	2014	2	18	1	36009	2	1	121.633	25.7	0.2	24.45	46.85	0.00817996
'CT4002226'	4	20140218	2014	2	18	1	36009	2	1	121.633	25.6833	0.35	24.45	46.85	0.0143149
'CT4002226'	4	20140218	2014	2	18	1	36009	2	1	121.633	25.6667	0.3	24.45	46.85	0.0122699
'CT4002226'	4	20140218	2014	2	18	1	36009	2	1	121.633	25.65	0.3	24.45	46.85	0.0122699
'CT4002226'	4	20140218	2014	2	18	1	36009	2	1	121.633	25.6333	0.35	24.45	46.85	0.0143149
'CT4002226'	4	20140218	2014	2	18	1	36009	2	1	121.617	25.6333	0.15	24.45	46.85	0.00613497
'CT4002226'	4	20140218	2014	2	18	1	36009	2	1	121.6	25.6333	0.2	24.45	46.85	0.00817996
'CT4002226'	4	20140218	2014	2	18	1	36009	2	1	121.6	25.6167	0.15	24.45	46.85	0.00613497
'CT4002226'	4	20140218	2014	2	18	1	36009	2	1	121.617	25.6167	0.35	24.45	46.85	0.0143149
'CT3005378'	3	20140911	2014	9	11	1	36009	2	3.5	121.883	24.8	0.4	6	7.81972	0.233333
'CT3005378'	3	20140911	2014	9	11	1	36009	2	3.5	121.883	24.7833	1.1	6	7.81972	0.641667
'CT3005378'	3	20140911	2014	9	11	1	36009	2	3.5	121.883	24.7667	0.7	6	7.81972	0.408333
'CT3005378'	3	20140911	2014	9	11	1	36009	2	3.5	121.867	24.7667	0.45	6	7.81972	0.2625
'CT3005378'	3	20140911	2014	9	11	1	36009	2	3.5	121.867	24.75	0.65	6	7.81972	0.379167
'CT3005378'	3	20140911	2014	9	11	1	36009	2	3.5	121.867	24.7333	0.7	6	7.81972	0.408333
'CT3005378'	3	20140911	2014	9	11	1	36009	2	3.5	121.867	24.7167	0.05	6	7.81972	0.0291667
'CT3005378'	3	20140911	2014	9	11	1	36009	2	3.5	121.883	24.7333	0.25	6	7.81972	0.145833
'CT3005378'	3	20140911	2014	9	11	1	36009	2	3.5	121.883	24.75	0.35	6	7.81972	0.204167
'CT3005378'	3	20140911	2014	9	11	1	36009	2	3.5	121.867	24.8	0.35	6	7.81972	0.204167
'CT3005378'	3	20140911	2014	9	11	1	36009	2	3.5	121.867	24.8167	0.35	6	7.81972	0.204167
'CT3005378'	3	20140911	2014	9	11	1	36009	2	3.5	121.883	24.8167	0.1	6	7.81972	0.0583333
'CT3005378'	3	20140911	2014	9	11	1	36009	2	3.5	121.883	24.8333	0.35	6	7.81972	0.204167
'CT3005378'	3	20140911	2014	9	11	1	36009	2	3.5	121.867	24.8333	0.15	6	7.81972	0.0875
'CT3005378'	3	20140911	2014	9	11	1	36009	2	3.5	121.883	24.85	0.05	6	7.81972	0.0291667
'CT3005378'	3	20141104	2014	11	4	1	36009	2	3	121.883	24.8333	0.7	4.7	8.06778	0.446809
'CT3005378'	3	20141104	2014	11	4	1	36009	2	3	121.883	24.8167	0.65	4.7	8.06778	0.414894
'CT3005378'	3	20141104	2014	11	4	1	36009	2	3	121.883	24.8	0.75	4.7	8.06778	0.478723
'CT3005378'	3	20141104	2014	11	4	1	36009	2	3	121.883	24.7833	0.75	4.7	8.06778	0.478723
'CT3005378'	3	20141104	2014	11	4	1	36009	2	3	121.883	24.7667	0.5	4.7	8.06778	0.319149
'CT3005378'	3	20141104	2014	11	4	1	36009	2	3	121.883	24.75	0.15	4.7	8.06778	0.0957447
'CT3005378'	3	20141104	2014	11	4	1	36009	2	3	121.9	24.75	0.05	4.7	8.06778	0.0319149
'CT3005378'	3	20141104	2014	11	4	1	36009	2	3	121.9	24.7667	0.15	4.7	8.06778	0.0957447
'CT3005378'	3	20141104	2014	11	4	1	36009	2	3	121.9	24.8333	0.1	4.7	8.06778	0.0638298
'CT3005378'	3	20141104	2014	11	4	1	36009	2	3	121.9	24.85	0.45	4.7	8.06778	0.287234
'CT3005378'	3	20141104	2014	11	4	1	36009	2	3	121.9	24.8667	0.15	4.7	8.06778	0.0957447
'CT3005378'	3	20141104	2014	11	4	1	36009	2	3	121.917	24.8667	0.3	4.7	8.06778	0.191489
'CT3005378'	3	20141203	2014	12	3	1	36009	2	0.8	121.9	24.8667	0.2	3.2	7.42	0.05
'CT3005378'	3	20141203	2014	12	3	1	36009	2	0.8	121.883	24.85	0.1	3.2	7.42	0.025
'CT3005378'	3	20141203	2014	12	3	1	36009	2	0.8	121.867	24.8333	0.4	3.2	7.42	0.1
'CT3005378'	3	20141203	2014	12	3	1	36009	2	0.8	121.867	24.8167	0.3	3.2	7.42	0.075
'CT3005378'	3	20141203	2014	12	3	1	36009	2	0.8	121.867	24.8	0.55	3.2	7.42	0.1375
'CT3005378'	3	20141203	2014	12	3	1	36009	2	0.8	121.867	24.7833	0.5	3.2	7.42	0.125
'CT3005378'	3	20141203	2014	12	3	1	36009	2	0.8	121.85	24.7833	0.2	3.2	7.42	0.05
'CT3005378'	3	20141203	2014	12	3	1	36009	2	0.8	121.883	24.7833	0.05	3.2	7.42	0.0125
'CT3005378'	3	20141203	2014	12	3	1	36009	2	0.8	121.883	24.8	0.2	3.2	7.42	0.05
'CT3005378'	3	20141203	2014	12	3	1	36009	2	0.8	121.883	24.8167	0.25	3.2	7.42	0.0625
'CT3005378'	3	20141203	2014	12	3	1	36009	2	0.8	121.883	24.8333	0.4	3.2	7.42	0.1
'CT3005378'	3	20141203	2014	12	3	1	36009	2	0.8	121.9	24.85	0.05	3.2	7.42	0.0125
'CT3005100'	3	20141107	2014	11	7	1	36009	2	5	121.25	25.2167	1.8	16.6	40.4	0.542169
'CT3005100'	3	20141107	2014	11	7	1	36009	2	5	121.233	25.2167	3.3	16.6	40.4	0.993976
'CT3005100'	3	20141107	2014	11	7	1	36009	2	5	121.217	25.2167	1.1	16.6	40.4	0.331325
'CT3005100'	3	20141107	2014	11	7	1	36009	2	5	121.217	25.2	2.5	16.6	40.4	0.753012
'CT3005100'	3	20141107	2014	11	7	1	36009	2	5	121.2	25.2	4.1	16.6	40.4	1.23494
'CT3005100'	3	20141107	2014	11	7	1	36009	2	5	121.2	25.2167	0.2	16.6	40.4	0.060241
'CT3005100'	3	20141107	2014	11	7	1	36009	2	5	121.183	25.2167	1.6	16.6	40.4	0.481928
'CT3005100'	3	20141107	2014	11	7	1	36009	2	5	121.167	25.2	0.1	16.6	40.4	0.0301205
'CT3005100'	3	20141107	2014	11	7	1	36009	2	5	121.183	25.2	1.7	16.6	40.4	0.512048
'CT3005100'	3	20141107	2014	11	7	1	36009	2	5	121.25	25.2	0.1	16.6	40.4	0.0301205
'CT3005100'	3	20141107	2014	11	7	1	36009	2	5	121.233	25.2	0.1	16.6	40.4	0.0301205
'CT3005100'	3	20141112	2014	11	12	1	36009	2	1	121.267	25.1833	0.3	17.5	14.8	0.0171429
'CT3005100'	3	20141112	2014	11	12	1	36009	2	1	121.25	25.1833	0.8	17.5	14.8	0.0457143
'CT3005100'	3	20141112	2014	11	12	1	36009	2	1	121.233	25.1833	2.1	17.5	14.8	0.12
'CT3005100'	3	20141112	2014	11	12	1	36009	2	1	121.217	25.1833	1.3	17.5	14.8	0.0742857
'CT3005100'	3	20141112	2014	11	12	1	36009	2	1	121.217	25.1667	0.9	17.5	14.8	0.0514286
'CT3005100'	3	20141112	2014	11	12	1	36009	2	1	121.2	25.1667	2.9	17.5	14.8	0.165714
'CT3005100'	3	20141112	2014	11	12	1	36009	2	1	121.183	25.1667	2.7	17.5	14.8	0.154286
'CT3005100'	3	20141112	2014	11	12	1	36009	2	1	121.167	25.1667	1.5	17.5	14.8	0.0857143
'CT3005100'	3	20141112	2014	11	12	1	36009	2	1	121.167	25.15	3	17.5	14.8	0.171429
'CT3005100'	3	20141112	2014	11	12	1	36009	2	1	121.15	25.15	0.6	17.5	14.8	0.0342857
'CT3005100'	3	20141112	2014	11	12	1	36009	2	1	121.183	25.15	1	17.5	14.8	0.0571429
'CT3005100'	3	20141112	2014	11	12	1	36009	2	1	121.2	25.1833	0.4	17.5	14.8	0.0228571
'CT5001629'	5	20140912	2014	9	12	1	36009	2	500	122.2	26.3333	0.35	6.1	70.6036	28.6885
'CT5001629'	5	20140912	2014	9	12	1	36009	2	500	122.2	26.35	0.7	6.1	70.6036	57.377
'CT5001629'	5	20140912	2014	9	12	1	36009	2	500	122.2	26.3667	0.25	6.1	70.6036	20.4918
'CT5001629'	5	20140912	2014	9	12	1	36009	2	500	123.05	28.15	0.85	6.1	70.6036	69.6721
'CT5001629'	5	20140912	2014	9	12	1	36009	2	500	123.067	28.15	0.45	6.1	70.6036	36.8852
'CT5001629'	5	20140912	2014	9	12	1	36009	2	500	123.067	28.1667	0.25	6.1	70.6036	20.4918
'CT5001629'	5	20140912	2014	9	12	1	36009	2	500	123.083	28.1667	0.85	6.1	70.6036	69.6721
'CT5001629'	5	20140912	2014	9	12	1	36009	2	500	123.1	28.1667	0.2	6.1	70.6036	16.3934
'CT5001629'	5	20140912	2014	9	12	1	36009	2	500	123.333	28.0667	0.2	6.1	70.6036	16.3934
'CT5001629'	5	20140912	2014	9	12	1	36009	2	500	124.783	26.6667	0.25	6.1	70.6036	20.4918
'CT5001629'	5	20140912	2014	9	12	1	36009	2	500	124.067	26.3167	0.75	6.1	70.6036	61.4754
'CT5001629'	5	20140912	2014	9	12	1	36009	2	500	124.05	26.3167	0.25	6.1	70.6036	20.4918
'CT5001629'	5	20140912	2014	9	12	1	36009	2	500	124.05	26.3	0.1	6.1	70.6036	8.19672
'CT5001629'	5	20140912	2014	9	12	1	36009	2	500	124.033	26.3	0.35	6.1	70.6036	28.6885
'CT5001629'	5	20140912	2014	9	12	1	36009	2	500	124.017	26.3	0.25	6.1	70.6036	20.4918
'CT5001629'	5	20140912	2014	9	12	1	36009	2	500	124	26.3	0.05	6.1	70.6036	4.09836
'CT3004178'	3	20141013	2014	10	13	2	36009	2	400	121.383	25.1833	2	9.25	11.5289	86.4865
'CT3004178'	3	20141013	2014	10	13	2	36009	2	400	121.383	25.2	0.15	9.25	11.5289	6.48649
'CT3004178'	3	20141013	2014	10	13	2	36009	2	400	121.367	25.1833	1.4	9.25	11.5289	60.5405
'CT3004178'	3	20141013	2014	10	13	2	36009	2	400	121.367	25.2	0.2	9.25	11.5289	8.64865
'CT3004178'	3	20141013	2014	10	13	2	36009	2	400	121.367	25.2167	0.3	9.25	11.5289	12.973
'CT3004178'	3	20141013	2014	10	13	2	36009	2	400	121.367	25.2333	0.1	9.25	11.5289	4.32432
'CT3004178'	3	20141013	2014	10	13	2	36009	2	400	121.367	25.25	0.05	9.25	11.5289	2.16216
'CT3004178'	3	20141013	2014	10	13	2	36009	2	400	121.383	25.2333	0.1	9.25	11.5289	4.32432
'CT3004178'	3	20141013	2014	10	13	2	36009	2	400	121.4	25.2167	0.6	9.25	11.5289	25.9459
'CT3004178'	3	20141013	2014	10	13	2	36009	2	400	121.4	25.2333	0.1	9.25	11.5289	4.32432
'CT3004178'	3	20141013	2014	10	13	2	36009	2	400	121.417	25.2333	0.6	9.25	11.5289	25.9459
'CT3004178'	3	20141013	2014	10	13	2	36009	2	400	121.417	25.25	0.05	9.25	11.5289	2.16216
'CT3004178'	3	20141013	2014	10	13	2	36009	2	400	121.433	25.25	0.3	9.25	11.5289	12.973
'CT3004178'	3	20141013	2014	10	13	2	36009	2	400	121.433	25.2667	0.3	9.25	11.5289	12.973
'CT3004178'	3	20141013	2014	10	13	2	36009	2	400	121.45	25.2667	0.2	9.25	11.5289	8.64865
'CT3004178'	3	20141013	2014	10	13	2	36009	2	400	121.45	25.2833	0.15	9.25	11.5289	6.48649
'CT3004178'	3	20141013	2014	10	13	2	36009	2	400	121.467	25.2833	1.05	9.25	11.5289	45.4054
'CT3004178'	3	20141013	2014	10	13	2	36009	2	400	121.467	25.3	1	9.25	11.5289	43.2432
'CT3004178'	3	20141013	2014	10	13	2	36009	2	400	121.45	25.3	0.5	9.25	11.5289	21.6216
'CT3004178'	3	20141013	2014	10	13	2	36009	2	400	121.433	25.3	0.1	9.25	11.5289	4.32432
'CT3004178'	3	20141014	2014	10	14	2	36009	2	80	121.367	25.1667	0.05	5.05	7.38333	0.792079
'CT3004178'	3	20141014	2014	10	14	2	36009	2	80	121.35	25.1667	0.6	5.05	7.38333	9.50495
'CT3004178'	3	20141014	2014	10	14	2	36009	2	80	121.333	25.1667	1	5.05	7.38333	15.8416
'CT3004178'	3	20141014	2014	10	14	2	36009	2	80	121.317	25.1667	0.1	5.05	7.38333	1.58416
'CT3004178'	3	20141014	2014	10	14	2	36009	2	80	121.333	25.1833	0.1	5.05	7.38333	1.58416
'CT3004178'	3	20141014	2014	10	14	2	36009	2	80	121.333	25.2	0.1	5.05	7.38333	1.58416
'CT3004178'	3	20141014	2014	10	14	2	36009	2	80	121.35	25.1833	0.65	5.05	7.38333	10.297
'CT3004178'	3	20141014	2014	10	14	2	36009	2	80	121.35	25.2	0.15	5.05	7.38333	2.37624
'CT3004178'	3	20141014	2014	10	14	2	36009	2	80	121.383	25.2	0.05	5.05	7.38333	0.792079
'CT3004178'	3	20141014	2014	10	14	2	36009	2	80	121.383	25.2167	0.9	5.05	7.38333	14.2574
'CT3004178'	3	20141014	2014	10	14	2	36009	2	80	121.383	25.2333	1.25	5.05	7.38333	19.802
'CT3004178'	3	20141014	2014	10	14	2	36009	2	80	121.383	25.25	0.1	5.05	7.38333	1.58416
'CT3004178'	3	20141015	2014	10	15	2	36009	2	100	121.4	25.1833	0.15	6.6	9.23694	2.27273
'CT3004178'	3	20141015	2014	10	15	2	36009	2	100	121.383	25.1833	0.1	6.6	9.23694	1.51515
'CT3004178'	3	20141015	2014	10	15	2	36009	2	100	121.383	25.2	0.6	6.6	9.23694	9.09091
'CT3004178'	3	20141015	2014	10	15	2	36009	2	100	121.367	25.2	0.05	6.6	9.23694	0.757576
'CT3004178'	3	20141015	2014	10	15	2	36009	2	100	121.383	25.2167	0.3	6.6	9.23694	4.54545
'CT3004178'	3	20141015	2014	10	15	2	36009	2	100	121.383	25.2333	0.1	6.6	9.23694	1.51515
'CT3004178'	3	20141015	2014	10	15	2	36009	2	100	121.367	25.2333	0.15	6.6	9.23694	2.27273
'CT3004178'	3	20141015	2014	10	15	2	36009	2	100	121.367	25.25	0.3	6.6	9.23694	4.54545
'CT3004178'	3	20141015	2014	10	15	2	36009	2	100	121.367	25.2667	0.2	6.6	9.23694	3.0303
'CT3004178'	3	20141015	2014	10	15	2	36009	2	100	121.417	25.2	0.05	6.6	9.23694	0.757576
'CT3004178'	3	20141015	2014	10	15	2	36009	2	100	121.4	25.2167	0.15	6.6	9.23694	2.27273
'CT3004178'	3	20141015	2014	10	15	2	36009	2	100	121.417	25.2167	0.5	6.6	9.23694	7.57576
'CT3004178'	3	20141015	2014	10	15	2	36009	2	100	121.417	25.2333	0.6	6.6	9.23694	9.09091
'CT3004178'	3	20141015	2014	10	15	2	36009	2	100	121.433	25.2333	0.15	6.6	9.23694	2.27273
'CT3004178'	3	20141015	2014	10	15	2	36009	2	100	121.433	25.25	0.05	6.6	9.23694	0.757576
'CT3004178'	3	20141015	2014	10	15	2	36009	2	100	121.433	25.2667	0.15	6.6	9.23694	2.27273
'CT3004178'	3	20141015	2014	10	15	2	36009	2	100	121.45	25.2667	0.3	6.6	9.23694	4.54545
'CT3004178'	3	20141015	2014	10	15	2	36009	2	100	121.45	25.2833	0.25	6.6	9.23694	3.78788
'CT3004178'	3	20141015	2014	10	15	2	36009	2	100	121.467	25.2833	0.1	6.6	9.23694	1.51515
'CT3004178'	3	20141015	2014	10	15	2	36009	2	100	121.467	25.3	0.05	6.6	9.23694	0.757576
'CT3004178'	3	20141015	2014	10	15	2	36009	2	100	121.483	25.3	0.45	6.6	9.23694	6.81818
'CT3004178'	3	20141015	2014	10	15	2	36009	2	100	121.5	25.3	0.1	6.6	9.23694	1.51515
'CT3004178'	3	20141015	2014	10	15	2	36009	2	100	121.5	25.3167	0.95	6.6	9.23694	14.3939
'CT3004178'	3	20141015	2014	10	15	2	36009	2	100	121.483	25.3333	0.65	6.6	9.23694	9.84848
'CT3004178'	3	20141015	2014	10	15	2	36009	2	100	121.483	25.3167	0.15	6.6	9.23694	2.27273
'CT3004178'	3	20141017	2014	10	17	2	36009	2	70	121.4	25.1833	0.05	7.15	8.98083	0.48951
'CT3004178'	3	20141017	2014	10	17	2	36009	2	70	121.4	25.2	0.05	7.15	8.98083	0.48951
'CT3004178'	3	20141017	2014	10	17	2	36009	2	70	121.383	25.2	0.2	7.15	8.98083	1.95804
'CT3004178'	3	20141017	2014	10	17	2	36009	2	70	121.4	25.2167	0.5	7.15	8.98083	4.8951
'CT3004178'	3	20141017	2014	10	17	2	36009	2	70	121.4	25.2333	1.15	7.15	8.98083	11.2587
'CT3004178'	3	20141017	2014	10	17	2	36009	2	70	121.4	25.25	0.75	7.15	8.98083	7.34266
'CT3004178'	3	20141017	2014	10	17	2	36009	2	70	121.383	25.25	0.45	7.15	8.98083	4.40559
'CT3004178'	3	20141017	2014	10	17	2	36009	2	70	121.383	25.2667	0.75	7.15	8.98083	7.34266
'CT3004178'	3	20141017	2014	10	17	2	36009	2	70	121.367	25.2667	0.1	7.15	8.98083	0.979021
'CT3004178'	3	20141017	2014	10	17	2	36009	2	70	121.383	25.2333	0.1	7.15	8.98083	0.979021
'CT3004178'	3	20141017	2014	10	17	2	36009	2	70	121.417	25.25	0.3	7.15	8.98083	2.93706
'CT3004178'	3	20141017	2014	10	17	2	36009	2	70	121.417	25.2667	0.6	7.15	8.98083	5.87413
'CT3004178'	3	20141017	2014	10	17	2	36009	2	70	121.433	25.2667	0.2	7.15	8.98083	1.95804
'CT3004178'	3	20141017	2014	10	17	2	36009	2	70	121.433	25.2833	0.65	7.15	8.98083	6.36364
'CT3004178'	3	20141017	2014	10	17	2	36009	2	70	121.45	25.2833	0.3	7.15	8.98083	2.93706
'CT3004178'	3	20141017	2014	10	17	2	36009	2	70	121.45	25.3	0.25	7.15	8.98083	2.44755
'CT3004178'	3	20141017	2014	10	17	2	36009	2	70	121.467	25.3	0.4	7.15	8.98083	3.91608
'CT3004178'	3	20141017	2014	10	17	2	36009	2	70	121.467	25.3167	0.35	7.15	8.98083	3.42657
'CT3004178'	3	20141020	2014	10	20	2	36009	2	120	121.467	25.2833	0.9	7.05	10.1328	15.3191
'CT3004178'	3	20141020	2014	10	20	2	36009	2	120	121.467	25.2667	0.15	7.05	10.1328	2.55319
'CT3004178'	3	20141020	2014	10	20	2	36009	2	120	121.45	25.2667	0.6	7.05	10.1328	10.2128
'CT3004178'	3	20141020	2014	10	20	2	36009	2	120	121.45	25.2833	0.4	7.05	10.1328	6.80851
'CT3004178'	3	20141020	2014	10	20	2	36009	2	120	121.45	25.3	0.15	7.05	10.1328	2.55319
'CT3004178'	3	20141020	2014	10	20	2	36009	2	120	121.433	25.3	0.1	7.05	10.1328	1.70213
'CT3004178'	3	20141020	2014	10	20	2	36009	2	120	121.433	25.3167	0.15	7.05	10.1328	2.55319
'CT3004178'	3	20141020	2014	10	20	2	36009	2	120	121.417	25.3167	0.15	7.05	10.1328	2.55319
'CT3004178'	3	20141020	2014	10	20	2	36009	2	120	121.417	25.25	0.2	7.05	10.1328	3.40426
'CT3004178'	3	20141020	2014	10	20	2	36009	2	120	121.417	25.2333	0.6	7.05	10.1328	10.2128
'CT3004178'	3	20141020	2014	10	20	2	36009	2	120	121.4	25.2333	0.6	7.05	10.1328	10.2128
'CT3004178'	3	20141020	2014	10	20	2	36009	2	120	121.383	25.2333	0.2	7.05	10.1328	3.40426
'CT3004178'	3	20141020	2014	10	20	2	36009	2	120	121.383	25.25	0.7	7.05	10.1328	11.9149
'CT3004178'	3	20141020	2014	10	20	2	36009	2	120	121.367	25.25	0.1	7.05	10.1328	1.70213
'CT3004178'	3	20141020	2014	10	20	2	36009	2	120	121.367	25.2667	1.4	7.05	10.1328	23.8298
'CT3004178'	3	20141020	2014	10	20	2	36009	2	120	121.367	25.2833	0.5	7.05	10.1328	8.51064
'CT3004178'	3	20141020	2014	10	20	2	36009	2	120	121.383	25.2833	0.15	7.05	10.1328	2.55319
'CT3004178'	3	20141026	2014	10	26	2	36009	2	150	121.467	25.2833	0.7	7.1	10.1836	14.7887
'CT3004178'	3	20141026	2014	10	26	2	36009	2	150	121.483	25.2833	0.5	7.1	10.1836	10.5634
'CT3004178'	3	20141026	2014	10	26	2	36009	2	150	121.467	25.2667	0.8	7.1	10.1836	16.9014
'CT3004178'	3	20141026	2014	10	26	2	36009	2	150	121.483	25.2667	0.3	7.1	10.1836	6.33803
'CT3004178'	3	20141026	2014	10	26	2	36009	2	150	121.483	25.3167	1.55	7.1	10.1836	32.7465
'CT3004178'	3	20141026	2014	10	26	2	36009	2	150	121.483	25.3333	0.1	7.1	10.1836	2.11268
'CT3004178'	3	20141026	2014	10	26	2	36009	2	150	121.467	25.3167	0.35	7.1	10.1836	7.39437
'CT3004178'	3	20141026	2014	10	26	2	36009	2	150	121.467	25.3333	0.4	7.1	10.1836	8.4507
'CT3004178'	3	20141026	2014	10	26	2	36009	2	150	121.433	25.3	0.3	7.1	10.1836	6.33803
'CT3004178'	3	20141026	2014	10	26	2	36009	2	150	121.417	25.3	0.3	7.1	10.1836	6.33803
'CT3004178'	3	20141026	2014	10	26	2	36009	2	150	121.383	25.2333	0.55	7.1	10.1836	11.6197
'CT3004178'	3	20141026	2014	10	26	2	36009	2	150	121.367	25.2333	0.75	7.1	10.1836	15.8451
'CT3004178'	3	20141026	2014	10	26	2	36009	2	150	121.35	25.2333	0.1	7.1	10.1836	2.11268
'CT3004178'	3	20141026	2014	10	26	2	36009	2	150	121.35	25.25	0.4	7.1	10.1836	8.4507
'CT3004178'	3	20141104	2014	11	4	2	36009	2	80	121.35	25.1667	0.15	8.65	13.3783	1.38728
'CT3004178'	3	20141104	2014	11	4	2	36009	2	80	121.217	25.1333	0.25	8.65	13.3783	2.31214
'CT3004178'	3	20141104	2014	11	4	2	36009	2	80	121.217	25.15	0.05	8.65	13.3783	0.462428
'CT3004178'	3	20141104	2014	11	4	2	36009	2	80	121.217	25.1667	0.05	8.65	13.3783	0.462428
'CT3004178'	3	20141104	2014	11	4	2	36009	2	80	121.233	25.15	0.3	8.65	13.3783	2.77457
'CT3004178'	3	20141104	2014	11	4	2	36009	2	80	121.25	25.15	0.4	8.65	13.3783	3.69942
'CT3004178'	3	20141104	2014	11	4	2	36009	2	80	121.267	25.15	0.65	8.65	13.3783	6.01156
'CT3004178'	3	20141104	2014	11	4	2	36009	2	80	121.267	25.1667	0.3	8.65	13.3783	2.77457
'CT3004178'	3	20141104	2014	11	4	2	36009	2	80	121.283	25.1667	0.65	8.65	13.3783	6.01156
'CT3004178'	3	20141104	2014	11	4	2	36009	2	80	121.3	25.1667	0.15	8.65	13.3783	1.38728
'CT3004178'	3	20141104	2014	11	4	2	36009	2	80	121.3	25.1833	0.9	8.65	13.3783	8.3237
'CT3004178'	3	20141104	2014	11	4	2	36009	2	80	121.317	25.1833	0.45	8.65	13.3783	4.16185
'CT3004178'	3	20141104	2014	11	4	2	36009	2	80	121.283	25.1333	0.9	8.65	13.3783	8.3237
'CT3004178'	3	20141104	2014	11	4	2	36009	2	80	121.283	25.15	0.15	8.65	13.3783	1.38728
'CT3004178'	3	20141104	2014	11	4	2	36009	2	80	121.25	25.1333	0.4	8.65	13.3783	3.69942
'CT3004178'	3	20141104	2014	11	4	2	36009	2	80	121.233	25.1333	0.15	8.65	13.3783	1.38728
'CT3004178'	3	20141104	2014	11	4	2	36009	2	80	121.2	25.1333	0.95	8.65	13.3783	8.78613
'CT3004178'	3	20141104	2014	11	4	2	36009	2	80	121.183	25.1333	0.95	8.65	13.3783	8.78613
'CT3004178'	3	20141104	2014	11	4	2	36009	2	80	121.167	25.1333	0.5	8.65	13.3783	4.62428
'CT3004178'	3	20141104	2014	11	4	2	36009	2	80	121.183	25.15	0.35	8.65	13.3783	3.23699
'CT3004178'	3	20141106	2014	11	6	2	36009	2	100	121.4	25.1833	0.05	8.2	9.57861	0.609756
'CT3004178'	3	20141106	2014	11	6	2	36009	2	100	121.417	25.2333	1.05	8.2	9.57861	12.8049
'CT3004178'	3	20141106	2014	11	6	2	36009	2	100	121.433	25.2333	0.05	8.2	9.57861	0.609756
'CT3004178'	3	20141106	2014	11	6	2	36009	2	100	121.433	25.25	1.9	8.2	9.57861	23.1707
'CT3004178'	3	20141106	2014	11	6	2	36009	2	100	121.433	25.2667	0.4	8.2	9.57861	4.87805
'CT3004178'	3	20141106	2014	11	6	2	36009	2	100	121.45	25.2667	0.5	8.2	9.57861	6.09756
'CT3004178'	3	20141106	2014	11	6	2	36009	2	100	121.45	25.25	0.5	8.2	9.57861	6.09756
'CT3004178'	3	20141106	2014	11	6	2	36009	2	100	121.433	25.2833	0.3	8.2	9.57861	3.65854
'CT3004178'	3	20141106	2014	11	6	2	36009	2	100	121.417	25.25	0.2	8.2	9.57861	2.43902
'CT3004178'	3	20141106	2014	11	6	2	36009	2	100	121.4	25.2333	0.5	8.2	9.57861	6.09756
'CT3004178'	3	20141106	2014	11	6	2	36009	2	100	121.4	25.2167	0.15	8.2	9.57861	1.82927
'CT3004178'	3	20141106	2014	11	6	2	36009	2	100	121.383	25.2167	0.5	8.2	9.57861	6.09756
'CT3004178'	3	20141106	2014	11	6	2	36009	2	100	121.367	25.2167	0.25	8.2	9.57861	3.04878
'CT3004178'	3	20141106	2014	11	6	2	36009	2	100	121.367	25.2	0.4	8.2	9.57861	4.87805
'CT3004178'	3	20141106	2014	11	6	2	36009	2	100	121.35	25.2167	0.75	8.2	9.57861	9.14634
'CT3004178'	3	20141106	2014	11	6	2	36009	2	100	121.333	25.2167	0.4	8.2	9.57861	4.87805
'CT3004178'	3	20141106	2014	11	6	2	36009	2	100	121.333	25.2	0.3	8.2	9.57861	3.65854
'CT3004178'	3	20141110	2014	11	10	2	36009	2	200	121.383	25.1833	1.7	6.45	8.13444	52.7132
'CT3004178'	3	20141110	2014	11	10	2	36009	2	200	121.383	25.2	0.1	6.45	8.13444	3.10078
'CT3004178'	3	20141110	2014	11	10	2	36009	2	200	121.4	25.2	0.45	6.45	8.13444	13.9535
'CT3004178'	3	20141110	2014	11	10	2	36009	2	200	121.383	25.2167	0.05	6.45	8.13444	1.55039
'CT3004178'	3	20141110	2014	11	10	2	36009	2	200	121.383	25.2333	0.8	6.45	8.13444	24.8062
'CT3004178'	3	20141110	2014	11	10	2	36009	2	200	121.383	25.25	0.05	6.45	8.13444	1.55039
'CT3004178'	3	20141110	2014	11	10	2	36009	2	200	121.4	25.2167	1.05	6.45	8.13444	32.5581
'CT3004178'	3	20141110	2014	11	10	2	36009	2	200	121.417	25.2167	0.5	6.45	8.13444	15.5039
'CT3004178'	3	20141110	2014	11	10	2	36009	2	200	121.4	25.2333	0.5	6.45	8.13444	15.5039
'CT3004178'	3	20141110	2014	11	10	2	36009	2	200	121.367	25.2333	1.1	6.45	8.13444	34.1085
'CT3004178'	3	20141110	2014	11	10	2	36009	2	200	121.35	25.2333	0.05	6.45	8.13444	1.55039
'CT3004178'	3	20141110	2014	11	10	2	36009	2	200	121.35	25.2167	0.1	6.45	8.13444	3.10078
'CT3004178'	3	20141111	2014	11	11	2	36009	2	100	121.417	25.2333	1.25	8.15	10.93	15.3374
'CT3004178'	3	20141111	2014	11	11	2	36009	2	100	121.433	25.2333	0.6	8.15	10.93	7.36196
'CT3004178'	3	20141111	2014	11	11	2	36009	2	100	121.433	25.25	1.15	8.15	10.93	14.1104
'CT3004178'	3	20141111	2014	11	11	2	36009	2	100	121.45	25.2667	1.15	8.15	10.93	14.1104
'CT3004178'	3	20141111	2014	11	11	2	36009	2	100	121.433	25.2667	0.15	8.15	10.93	1.84049
'CT3004178'	3	20141111	2014	11	11	2	36009	2	100	121.417	25.25	0.05	8.15	10.93	0.613497
'CT3004178'	3	20141111	2014	11	11	2	36009	2	100	121.417	25.2667	0.15	8.15	10.93	1.84049
'CT3004178'	3	20141111	2014	11	11	2	36009	2	100	121.417	25.2833	0.65	8.15	10.93	7.97546
'CT3004178'	3	20141111	2014	11	11	2	36009	2	100	121.433	25.3	0.45	8.15	10.93	5.52147
'CT3004178'	3	20141111	2014	11	11	2	36009	2	100	121.467	25.2667	0.2	8.15	10.93	2.45399
'CT3004178'	3	20141111	2014	11	11	2	36009	2	100	121.45	25.3	0.35	8.15	10.93	4.29448
'CT3004178'	3	20141111	2014	11	11	2	36009	2	100	121.45	25.3167	0.35	8.15	10.93	4.29448
'CT3004178'	3	20141111	2014	11	11	2	36009	2	100	121.433	25.2833	0.8	8.15	10.93	9.81595
'CT3004178'	3	20141111	2014	11	11	2	36009	2	100	121.4	25.2833	0.15	8.15	10.93	1.84049
'CT3004178'	3	20141111	2014	11	11	2	36009	2	100	121.4	25.2667	0.4	8.15	10.93	4.90798
'CT3004178'	3	20141111	2014	11	11	2	36009	2	100	121.383	25.2667	0.3	8.15	10.93	3.68098
'CT3004178'	3	20141119	2014	11	19	2	36009	2	60	121.4	25.1833	0.15	7.45	8.98861	1.20805
'CT3004178'	3	20141119	2014	11	19	2	36009	2	60	121.4	25.2	0.85	7.45	8.98861	6.84564
'CT3004178'	3	20141119	2014	11	19	2	36009	2	60	121.383	25.1833	0.5	7.45	8.98861	4.02685
'CT3004178'	3	20141119	2014	11	19	2	36009	2	60	121.383	25.2	1.25	7.45	8.98861	10.0671
'CT3004178'	3	20141119	2014	11	19	2	36009	2	60	121.4	25.2167	0.05	7.45	8.98861	0.402685
'CT3004178'	3	20141119	2014	11	19	2	36009	2	60	121.383	25.2167	0.25	7.45	8.98861	2.01342
'CT3004178'	3	20141119	2014	11	19	2	36009	2	60	121.383	25.2333	0.2	7.45	8.98861	1.61074
'CT3004178'	3	20141119	2014	11	19	2	36009	2	60	121.367	25.2333	0.1	7.45	8.98861	0.805369
'CT3004178'	3	20141119	2014	11	19	2	36009	2	60	121.367	25.25	0.1	7.45	8.98861	0.805369
'CT3004178'	3	20141119	2014	11	19	2	36009	2	60	121.367	25.1833	0.95	7.45	8.98861	7.65101
'CT3004178'	3	20141119	2014	11	19	2	36009	2	60	121.367	25.1667	0.1	7.45	8.98861	0.805369
'CT3004178'	3	20141119	2014	11	19	2	36009	2	60	121.35	25.1667	0.6	7.45	8.98861	4.83221
'CT3004178'	3	20141119	2014	11	19	2	36009	2	60	121.333	25.1667	0.3	7.45	8.98861	2.41611
'CT3004178'	3	20141119	2014	11	19	2	36009	2	60	121.3	25.1833	0.9	7.45	8.98861	7.24832
'CT3004178'	3	20141119	2014	11	19	2	36009	2	60	121.3	25.1667	0.25	7.45	8.98861	2.01342
'CT3004178'	3	20141119	2014	11	19	2	36009	2	60	121.317	25.1667	0.9	7.45	8.98861	7.24832
'CT3004178'	3	20141120	2014	11	20	2	36009	2	100	121.383	25.1833	0.05	5.95	7.9825	0.840336
'CT3004178'	3	20141120	2014	11	20	2	36009	2	100	121.4	25.1833	0.05	5.95	7.9825	0.840336
'CT3004178'	3	20141120	2014	11	20	2	36009	2	100	121.4	25.2	0.05	5.95	7.9825	0.840336
'CT3004178'	3	20141120	2014	11	20	2	36009	2	100	121.417	25.2333	0.05	5.95	7.9825	0.840336
'CT3004178'	3	20141120	2014	11	20	2	36009	2	100	121.433	25.2333	0.15	5.95	7.9825	2.52101
'CT3004178'	3	20141120	2014	11	20	2	36009	2	100	121.433	25.25	1.05	5.95	7.9825	17.6471
'CT3004178'	3	20141120	2014	11	20	2	36009	2	100	121.45	25.25	0.15	5.95	7.9825	2.52101
'CT3004178'	3	20141120	2014	11	20	2	36009	2	100	121.433	25.2667	0.3	5.95	7.9825	5.04202
'CT3004178'	3	20141120	2014	11	20	2	36009	2	100	121.417	25.2667	0.15	5.95	7.9825	2.52101
'CT3004178'	3	20141120	2014	11	20	2	36009	2	100	121.417	25.2833	0.1	5.95	7.9825	1.68067
'CT3004178'	3	20141120	2014	11	20	2	36009	2	100	121.417	25.25	0.05	5.95	7.9825	0.840336
'CT3004178'	3	20141120	2014	11	20	2	36009	2	100	121.417	25.2167	0.5	5.95	7.9825	8.40336
'CT3004178'	3	20141120	2014	11	20	2	36009	2	100	121.4	25.2167	0.4	5.95	7.9825	6.72269
'CT3004178'	3	20141120	2014	11	20	2	36009	2	100	121.383	25.2167	0.5	5.95	7.9825	8.40336
'CT3004178'	3	20141120	2014	11	20	2	36009	2	100	121.367	25.2167	1.3	5.95	7.9825	21.8487
'CT3004178'	3	20141120	2014	11	20	2	36009	2	100	121.367	25.2	0.55	5.95	7.9825	9.2437
'CT3004178'	3	20141120	2014	11	20	2	36009	2	100	121.35	25.2	0.45	5.95	7.9825	7.56303
'CT3004178'	3	20141120	2014	11	20	2	36009	2	100	121.35	25.2167	0.1	5.95	7.9825	1.68067
'CT3004178'	3	20141125	2014	11	25	2	36009	2	30	121.433	25.25	0.15	4.45	6.29	1.01124
'CT3004178'	3	20141125	2014	11	25	2	36009	2	30	121.433	25.2833	0.05	4.45	6.29	0.337079
'CT3004178'	3	20141125	2014	11	25	2	36009	2	30	121.433	25.3	0.3	4.45	6.29	2.02247
'CT3004178'	3	20141125	2014	11	25	2	36009	2	30	121.45	25.3	1.1	4.45	6.29	7.41573
'CT3004178'	3	20141125	2014	11	25	2	36009	2	30	121.45	25.3167	1.05	4.45	6.29	7.07865
'CT3004178'	3	20141125	2014	11	25	2	36009	2	30	121.467	25.3	0.05	4.45	6.29	0.337079
'CT3004178'	3	20141125	2014	11	25	2	36009	2	30	121.433	25.3167	0.15	4.45	6.29	1.01124
'CT3004178'	3	20141125	2014	11	25	2	36009	2	30	121.417	25.25	0.1	4.45	6.29	0.674157
'CT3004178'	3	20141125	2014	11	25	2	36009	2	30	121.4	25.25	0.45	4.45	6.29	3.03371
'CT3004178'	3	20141125	2014	11	25	2	36009	2	30	121.4	25.2333	0.2	4.45	6.29	1.34831
'CT3004178'	3	20141125	2014	11	25	2	36009	2	30	121.383	25.2333	0.55	4.45	6.29	3.70787
'CT3004178'	3	20141125	2014	11	25	2	36009	2	30	121.367	25.2333	0.3	4.45	6.29	2.02247
'CT3004178'	3	20141127	2014	11	27	2	36009	2	40	121.4	25.1833	0.1	4.15	5.94222	0.963855
'CT3004178'	3	20141127	2014	11	27	2	36009	2	40	121.383	25.1833	0.45	4.15	5.94222	4.33735
'CT3004178'	3	20141127	2014	11	27	2	36009	2	40	121.367	25.1833	0.1	4.15	5.94222	0.963855
'CT3004178'	3	20141127	2014	11	27	2	36009	2	40	121.367	25.1667	0.05	4.15	5.94222	0.481928
'CT3004178'	3	20141127	2014	11	27	2	36009	2	40	121.35	25.2	0.05	4.15	5.94222	0.481928
'CT3004178'	3	20141127	2014	11	27	2	36009	2	40	121.383	25.2	0.25	4.15	5.94222	2.40964
'CT3004178'	3	20141127	2014	11	27	2	36009	2	40	121.4	25.2	0.9	4.15	5.94222	8.6747
'CT3004178'	3	20141127	2014	11	27	2	36009	2	40	121.4	25.2167	0.4	4.15	5.94222	3.85542
'CT3004178'	3	20141127	2014	11	27	2	36009	2	40	121.417	25.2167	0.05	4.15	5.94222	0.481928
'CT3004178'	3	20141127	2014	11	27	2	36009	2	40	121.4	25.2333	0.35	4.15	5.94222	3.37349
'CT3004178'	3	20141127	2014	11	27	2	36009	2	40	121.4	25.25	0.6	4.15	5.94222	5.78313
'CT3004178'	3	20141127	2014	11	27	2	36009	2	40	121.383	25.25	0.25	4.15	5.94222	2.40964
'CT3004178'	3	20141127	2014	11	27	2	36009	2	40	121.383	25.2667	0.6	4.15	5.94222	5.78313
'CT3004178'	3	20141202	2014	12	2	2	36009	2	30	121.4	25.2167	0.8	2.55	4.64	9.41176
'CT3004178'	3	20141202	2014	12	2	2	36009	2	30	121.417	25.2333	0.05	2.55	4.64	0.588235
'CT3004178'	3	20141202	2014	12	2	2	36009	2	30	121.4	25.2333	0.25	2.55	4.64	2.94118
'CT3004178'	3	20141202	2014	12	2	2	36009	2	30	121.417	25.25	0.3	2.55	4.64	3.52941
'CT3004178'	3	20141202	2014	12	2	2	36009	2	30	121.417	25.2667	0.1	2.55	4.64	1.17647
'CT3004178'	3	20141202	2014	12	2	2	36009	2	30	121.433	25.2667	0.25	2.55	4.64	2.94118
'CT3004178'	3	20141202	2014	12	2	2	36009	2	30	121.45	25.2667	0.3	2.55	4.64	3.52941
'CT3004178'	3	20141202	2014	12	2	2	36009	2	30	121.433	25.25	0.05	2.55	4.64	0.588235
'CT3004178'	3	20141202	2014	12	2	2	36009	2	30	121.45	25.25	0.15	2.55	4.64	1.76471
'CT3004178'	3	20141202	2014	12	2	2	36009	2	30	121.467	25.2667	0.1	2.55	4.64	1.17647
'CT3004178'	3	20141202	2014	12	2	2	36009	2	30	121.467	25.2833	0.2	2.55	4.64	2.35294
'CT3004178'	3	20141203	2014	12	3	2	36009	2	80	121.283	25.15	1.45	7.3	10.1336	15.8904
'CT3004178'	3	20141203	2014	12	3	2	36009	2	80	121.283	25.1333	0.3	7.3	10.1336	3.28767
'CT3004178'	3	20141203	2014	12	3	2	36009	2	80	121.267	25.1333	0.3	7.3	10.1336	3.28767
'CT3004178'	3	20141203	2014	12	3	2	36009	2	80	121.283	25.1167	0.05	7.3	10.1336	0.547945
'CT3004178'	3	20141203	2014	12	3	2	36009	2	80	121.267	25.15	0.85	7.3	10.1336	9.31507
'CT3004178'	3	20141203	2014	12	3	2	36009	2	80	121.25	25.15	0.6	7.3	10.1336	6.57534
'CT3004178'	3	20141203	2014	12	3	2	36009	2	80	121.233	25.15	0.5	7.3	10.1336	5.47945
'CT3004178'	3	20141203	2014	12	3	2	36009	2	80	121.217	25.15	0.5	7.3	10.1336	5.47945
'CT3004178'	3	20141203	2014	12	3	2	36009	2	80	121.217	25.1333	0.5	7.3	10.1336	5.47945
'CT3004178'	3	20141203	2014	12	3	2	36009	2	80	121.25	25.1167	0.8	7.3	10.1336	8.76712
'CT3004178'	3	20141203	2014	12	3	2	36009	2	80	121.267	25.1167	0.3	7.3	10.1336	3.28767
'CT3004178'	3	20141203	2014	12	3	2	36009	2	80	121.283	25.1667	0.55	7.3	10.1336	6.0274
'CT3004178'	3	20141203	2014	12	3	2	36009	2	80	121.3	25.1667	0.15	7.3	10.1336	1.64384
'CT3004178'	3	20141203	2014	12	3	2	36009	2	80	121.3	25.1833	0.25	7.3	10.1336	2.73973
'CT3004178'	3	20141203	2014	12	3	2	36009	2	80	121.317	25.1833	0.2	7.3	10.1336	2.19178
'CT3004239'	3	20140509	2014	5	9	1	36009	2	15	121.817	24.7833	0.2	4.8	18.1	0.625
'CT3004239'	3	20140509	2014	5	9	1	36009	2	15	121.817	24.7667	0.3	4.8	18.1	0.9375
'CT3004239'	3	20140509	2014	5	9	1	36009	2	15	121.817	24.75	0.2	4.8	18.1	0.625
'CT3004239'	3	20140509	2014	5	9	1	36009	2	15	121.833	24.75	0.15	4.8	18.1	0.46875
'CT3004239'	3	20140509	2014	5	9	1	36009	2	15	121.833	24.7333	0.45	4.8	18.1	1.40625
'CT3004239'	3	20140509	2014	5	9	1	36009	2	15	121.9	24.75	0.4	4.8	18.1	1.25
'CT3004239'	3	20140509	2014	5	9	1	36009	2	15	121.917	24.75	0.5	4.8	18.1	1.5625
'CT3004239'	3	20140509	2014	5	9	1	36009	2	15	121.933	24.75	0.55	4.8	18.1	1.71875
'CT3004239'	3	20140509	2014	5	9	1	36009	2	15	121.95	24.75	0.45	4.8	18.1	1.40625
'CT3004239'	3	20140509	2014	5	9	1	36009	2	15	121.967	24.75	0.15	4.8	18.1	0.46875
'CT3004239'	3	20140509	2014	5	9	1	36009	2	15	121.967	24.7667	0.05	4.8	18.1	0.15625
'CT3004239'	3	20140509	2014	5	9	1	36009	2	15	121.95	24.7667	0.2	4.8	18.1	0.625
'CT3004239'	3	20140509	2014	5	9	1	36009	2	15	121.9	24.7667	0.35	4.8	18.1	1.09375
'CT3004239'	3	20140509	2014	5	9	1	36009	2	15	121.883	24.7833	0.35	4.8	18.1	1.09375
'CT3004239'	3	20140509	2014	5	9	1	36009	2	15	121.883	24.8	0.3	4.8	18.1	0.9375
'CT3004239'	3	20140509	2014	5	9	1	36009	2	15	121.883	24.8167	0.2	4.8	18.1	0.625
'CT3004239'	3	20141014	2014	10	14	1	36009	2	0.6	121.883	24.8333	0.35	4.05	7.6	0.0518519
'CT3004239'	3	20141014	2014	10	14	1	36009	2	0.6	121.883	24.8167	0.45	4.05	7.6	0.0666667
'CT3004239'	3	20141014	2014	10	14	1	36009	2	0.6	121.883	24.8	0.7	4.05	7.6	0.103704
'CT3004239'	3	20141014	2014	10	14	1	36009	2	0.6	121.883	24.7833	0.85	4.05	7.6	0.125926
'CT3004239'	3	20141014	2014	10	14	1	36009	2	0.6	121.883	24.7667	0.7	4.05	7.6	0.103704
'CT3004239'	3	20141014	2014	10	14	1	36009	2	0.6	121.883	24.75	0.3	4.05	7.6	0.0444444
'CT3004239'	3	20141014	2014	10	14	1	36009	2	0.6	121.9	24.75	0.1	4.05	7.6	0.0148148
'CT3004239'	3	20141014	2014	10	14	1	36009	2	0.6	121.9	24.7667	0.15	4.05	7.6	0.0222222
'CT3004239'	3	20141014	2014	10	14	1	36009	2	0.6	121.867	24.8167	0.1	4.05	7.6	0.0148148
'CT3004239'	3	20141014	2014	10	14	1	36009	2	0.6	121.867	24.8333	0.05	4.05	7.6	0.00740741
'CT3004239'	3	20141014	2014	10	14	1	36009	2	0.6	121.883	24.85	0.3	4.05	7.6	0.0444444
'CT3004239'	3	20141104	2014	11	4	1	36009	2	1.5	121.883	24.85	0.35	3.6	7.45	0.145833
'CT3004239'	3	20141104	2014	11	4	1	36009	2	1.5	121.883	24.8333	0.15	3.6	7.45	0.0625
'CT3004239'	3	20141104	2014	11	4	1	36009	2	1.5	121.867	24.8333	0.15	3.6	7.45	0.0625
'CT3004239'	3	20141104	2014	11	4	1	36009	2	1.5	121.867	24.8167	0.65	3.6	7.45	0.270833
'CT3004239'	3	20141104	2014	11	4	1	36009	2	1.5	121.867	24.8	0.7	3.6	7.45	0.291667
'CT3004239'	3	20141104	2014	11	4	1	36009	2	1.5	121.867	24.7833	0.55	3.6	7.45	0.229167
'CT3004239'	3	20141104	2014	11	4	1	36009	2	1.5	121.867	24.7667	0.65	3.6	7.45	0.270833
'CT3004239'	3	20141104	2014	11	4	1	36009	2	1.5	121.867	24.75	0.1	3.6	7.45	0.0416667
'CT3004239'	3	20141104	2014	11	4	1	36009	2	1.5	121.85	24.7833	0.15	3.6	7.45	0.0625
'CT3004239'	3	20141104	2014	11	4	1	36009	2	1.5	121.85	24.8	0.15	3.6	7.45	0.0625
'CT3004239'	3	20141201	2014	12	1	1	36009	2	6	121.883	24.85	0.2	6.2	8.05	0.193548
'CT3004239'	3	20141201	2014	12	1	1	36009	2	6	121.883	24.8333	0.15	6.2	8.05	0.145161
'CT3004239'	3	20141201	2014	12	1	1	36009	2	6	121.867	24.8333	0.25	6.2	8.05	0.241935
'CT3004239'	3	20141201	2014	12	1	1	36009	2	6	121.867	24.8167	0.5	6.2	8.05	0.483871
'CT3004239'	3	20141201	2014	12	1	1	36009	2	6	121.867	24.8	0.45	6.2	8.05	0.435484
'CT3004239'	3	20141201	2014	12	1	1	36009	2	6	121.867	24.7833	0.45	6.2	8.05	0.435484
'CT3004239'	3	20141201	2014	12	1	1	36009	2	6	121.867	24.7667	0.45	6.2	8.05	0.435484
'CT3004239'	3	20141201	2014	12	1	1	36009	2	6	121.867	24.75	0.95	6.2	8.05	0.919355
'CT3004239'	3	20141201	2014	12	1	1	36009	2	6	121.867	24.7333	0.6	6.2	8.05	0.580645
'CT3004239'	3	20141201	2014	12	1	1	36009	2	6	121.85	24.7667	0.5	6.2	8.05	0.483871
'CT3004239'	3	20141201	2014	12	1	1	36009	2	6	121.85	24.7833	0.55	6.2	8.05	0.532258
'CT3004239'	3	20141201	2014	12	1	1	36009	2	6	121.85	24.8	0.95	6.2	8.05	0.919355
'CT3004239'	3	20141201	2014	12	1	1	36009	2	6	121.85	24.8167	0.2	6.2	8.05	0.193548
'CT3004239'	3	20141202	2014	12	2	1	36009	2	2.3	121.867	24.85	0.25	4.5	7.3	0.127778
'CT3004239'	3	20141202	2014	12	2	1	36009	2	2.3	121.867	24.8333	0.5	4.5	7.3	0.255556
'CT3004239'	3	20141202	2014	12	2	1	36009	2	2.3	121.867	24.8167	0.8	4.5	7.3	0.408889
'CT3004239'	3	20141202	2014	12	2	1	36009	2	2.3	121.867	24.8	0.5	4.5	7.3	0.255556
'CT3004239'	3	20141202	2014	12	2	1	36009	2	2.3	121.867	24.7833	0.45	4.5	7.3	0.23
'CT3004239'	3	20141202	2014	12	2	1	36009	2	2.3	121.867	24.7667	0.5	4.5	7.3	0.255556
'CT3004239'	3	20141202	2014	12	2	1	36009	2	2.3	121.867	24.75	0.35	4.5	7.3	0.178889
'CT3004239'	3	20141202	2014	12	2	1	36009	2	2.3	121.85	24.75	0.1	4.5	7.3	0.0511111
'CT3004239'	3	20141202	2014	12	2	1	36009	2	2.3	121.85	24.7667	0.35	4.5	7.3	0.178889
'CT3004239'	3	20141202	2014	12	2	1	36009	2	2.3	121.85	24.7833	0.45	4.5	7.3	0.23
'CT3004239'	3	20141202	2014	12	2	1	36009	2	2.3	121.85	24.8	0.25	4.5	7.3	0.127778
'CT2003966'	2	20140509	2014	5	9	1	36009	2	30	121.817	24.7667	0.15	6.7	9.6	0.671642
'CT2003966'	2	20140509	2014	5	9	1	36009	2	30	121.817	24.75	0.85	6.7	9.6	3.80597
'CT2003966'	2	20140509	2014	5	9	1	36009	2	30	121.817	24.7333	0.55	6.7	9.6	2.46269
'CT2003966'	2	20140509	2014	5	9	1	36009	2	30	121.833	24.7333	3.2	6.7	9.6	14.3284
'CT2003966'	2	20140509	2014	5	9	1	36009	2	30	121.833	24.7167	1.8	6.7	9.6	8.0597
'CT2003966'	2	20140509	2014	5	9	1	36009	2	30	121.833	24.75	0.15	6.7	9.6	0.671642
'CT2005577'	2	20141231	2014	12	31	1	36009	2	2	121.867	24.65	0.15	4.3	6.05528	0.0697674
'CT2005577'	2	20141231	2014	12	31	1	36009	2	2	121.867	24.6667	0.8	4.3	6.05528	0.372093
'CT2005577'	2	20141231	2014	12	31	1	36009	2	2	121.85	24.6667	0.2	4.3	6.05528	0.0930233
'CT2005577'	2	20141231	2014	12	31	1	36009	2	2	121.85	24.6833	0.95	4.3	6.05528	0.44186
'CT2005577'	2	20141231	2014	12	31	1	36009	2	2	121.867	24.6833	0.3	4.3	6.05528	0.139535
'CT2005577'	2	20141231	2014	12	31	1	36009	2	2	121.85	24.7	0.55	4.3	6.05528	0.255814
'CT2005577'	2	20141231	2014	12	31	1	36009	2	2	121.85	24.7167	0.2	4.3	6.05528	0.0930233
'CT2005577'	2	20141231	2014	12	31	1	36009	2	2	121.833	24.7167	0.25	4.3	6.05528	0.116279
'CT2005577'	2	20141231	2014	12	31	1	36009	2	2	121.85	24.65	0.9	4.3	6.05528	0.418605
'CT3002618'	3	20141009	2014	10	9	1	36009	2	10	121.9	24.9167	0.2	3.35	4.78639	0.597015
'CT3002618'	3	20141009	2014	10	9	1	36009	2	10	121.9	24.9	0.45	3.35	4.78639	1.34328
'CT3002618'	3	20141009	2014	10	9	1	36009	2	10	121.883	24.9	0.15	3.35	4.78639	0.447761
'CT3002618'	3	20141009	2014	10	9	1	36009	2	10	121.883	24.8833	0.6	3.35	4.78639	1.79104
'CT3002618'	3	20141009	2014	10	9	1	36009	2	10	121.867	24.8833	0.15	3.35	4.78639	0.447761
'CT3002618'	3	20141009	2014	10	9	1	36009	2	10	121.867	24.8667	0.45	3.35	4.78639	1.34328
'CT3002618'	3	20141009	2014	10	9	1	36009	2	10	121.85	24.8667	0.15	3.35	4.78639	0.447761
'CT3002618'	3	20141009	2014	10	9	1	36009	2	10	121.85	24.85	0.1	3.35	4.78639	0.298507
'CT3002618'	3	20141009	2014	10	9	1	36009	2	10	121.867	24.85	0.1	3.35	4.78639	0.298507
'CT3002618'	3	20141009	2014	10	9	1	36009	2	10	121.883	24.8667	0.1	3.35	4.78639	0.298507
'CT3002618'	3	20141009	2014	10	9	1	36009	2	10	121.9	24.8833	0.05	3.35	4.78639	0.149254
'CT3002618'	3	20141009	2014	10	9	1	36009	2	10	121.917	24.9	0.15	3.35	4.78639	0.447761
'CT3002618'	3	20141009	2014	10	9	1	36009	2	10	121.933	24.9167	0.35	3.35	4.78639	1.04478
'CT3002618'	3	20141009	2014	10	9	1	36009	2	10	121.933	24.9333	0.2	3.35	4.78639	0.597015
'CT3002618'	3	20141009	2014	10	9	1	36009	2	10	121.917	24.9167	0.15	3.35	4.78639	0.447761
'CT3003243'	3	20141103	2014	11	3	1	36009	2	3.3	121.867	24.85	0.15	6.35	7.79889	0.0779528
'CT3003243'	3	20141103	2014	11	3	1	36009	2	3.3	121.883	24.85	0.25	6.35	7.79889	0.129921
'CT3003243'	3	20141103	2014	11	3	1	36009	2	3.3	121.883	24.8333	1.2	6.35	7.79889	0.623622
'CT3003243'	3	20141103	2014	11	3	1	36009	2	3.3	121.883	24.8167	1.25	6.35	7.79889	0.649606
'CT3003243'	3	20141103	2014	11	3	1	36009	2	3.3	121.883	24.8	0.55	6.35	7.79889	0.285827
'CT3003243'	3	20141103	2014	11	3	1	36009	2	3.3	121.883	24.7833	0.95	6.35	7.79889	0.493701
'CT3003243'	3	20141103	2014	11	3	1	36009	2	3.3	121.883	24.7667	0.9	6.35	7.79889	0.467717
'CT3003243'	3	20141103	2014	11	3	1	36009	2	3.3	121.883	24.75	0.55	6.35	7.79889	0.285827
'CT3003243'	3	20141103	2014	11	3	1	36009	2	3.3	121.867	24.7833	0.1	6.35	7.79889	0.0519685
'CT3003243'	3	20141103	2014	11	3	1	36009	2	3.3	121.867	24.8	0.45	6.35	7.79889	0.233858
'CT3003243'	3	20141127	2014	11	27	1	36009	2	21	121.85	24.85	0.05	5.45	8.74389	0.192661
'CT3003243'	3	20141127	2014	11	27	1	36009	2	21	121.883	24.85	0.2	5.45	8.74389	0.770642
'CT3003243'	3	20141127	2014	11	27	1	36009	2	21	121.883	24.8333	0.1	5.45	8.74389	0.385321
'CT3003243'	3	20141127	2014	11	27	1	36009	2	21	121.883	24.8167	0.3	5.45	8.74389	1.15596
'CT3003243'	3	20141127	2014	11	27	1	36009	2	21	121.883	24.8	0.8	5.45	8.74389	3.08257
'CT3003243'	3	20141127	2014	11	27	1	36009	2	21	121.883	24.7833	0.9	5.45	8.74389	3.46789
'CT3003243'	3	20141127	2014	11	27	1	36009	2	21	121.883	24.7667	0.95	5.45	8.74389	3.66055
'CT3003243'	3	20141127	2014	11	27	1	36009	2	21	121.883	24.75	0.7	5.45	8.74389	2.69725
'CT3003243'	3	20141127	2014	11	27	1	36009	2	21	121.883	24.7333	0.55	5.45	8.74389	2.11927
'CT3003243'	3	20141127	2014	11	27	1	36009	2	21	121.883	24.7167	0.1	5.45	8.74389	0.385321
'CT3003243'	3	20141127	2014	11	27	1	36009	2	21	121.9	24.7167	0.1	5.45	8.74389	0.385321
'CT3003243'	3	20141127	2014	11	27	1	36009	2	21	121.9	24.7333	0.35	5.45	8.74389	1.34862
'CT3003243'	3	20141127	2014	11	27	1	36009	2	21	121.9	24.75	0.35	5.45	8.74389	1.34862
'CT3003511'	3	20140911	2014	9	11	1	36009	2	2	121.883	24.8	0.05	2.85	8.4	0.0350877
'CT3003511'	3	20140911	2014	9	11	1	36009	2	2	121.883	24.7333	0.45	2.85	8.4	0.315789
'CT3003511'	3	20140911	2014	9	11	1	36009	2	2	121.9	24.75	0.2	2.85	8.4	0.140351
'CT3003511'	3	20140911	2014	9	11	1	36009	2	2	121.883	24.75	0.15	2.85	8.4	0.105263
'CT3003511'	3	20140911	2014	9	11	1	36009	2	2	121.883	24.7667	0.45	2.85	8.4	0.315789
'CT3003511'	3	20140911	2014	9	11	1	36009	2	2	121.883	24.7833	0.45	2.85	8.4	0.315789
'CT3003511'	3	20140911	2014	9	11	1	36009	2	2	121.867	24.8	0.45	2.85	8.4	0.315789
'CT3003511'	3	20140911	2014	9	11	1	36009	2	2	121.867	24.8167	0.4	2.85	8.4	0.280702
'CT3003511'	3	20140911	2014	9	11	1	36009	2	2	121.867	24.8333	0.25	2.85	8.4	0.175439
'CT3003511'	3	20141024	2014	10	24	1	36009	2	0.3	121.883	24.8333	0.05	1.45	8.15	0.0103448
'CT3003511'	3	20141024	2014	10	24	1	36009	2	0.3	121.883	24.8167	0.1	1.45	8.15	0.0206897
'CT3003511'	3	20141024	2014	10	24	1	36009	2	0.3	121.883	24.8	0.1	1.45	8.15	0.0206897
'CT3003511'	3	20141024	2014	10	24	1	36009	2	0.3	121.883	24.7833	0.2	1.45	8.15	0.0413793
'CT3003511'	3	20141024	2014	10	24	1	36009	2	0.3	121.867	24.7667	0.05	1.45	8.15	0.0103448
'CT3003511'	3	20141024	2014	10	24	1	36009	2	0.3	121.867	24.75	0.15	1.45	8.15	0.0310345
'CT3003511'	3	20141024	2014	10	24	1	36009	2	0.3	121.867	24.7333	0.1	1.45	8.15	0.0206897
'CT3003511'	3	20141024	2014	10	24	1	36009	2	0.3	121.883	24.7333	0.15	1.45	8.15	0.0310345
'CT3003511'	3	20141024	2014	10	24	1	36009	2	0.3	121.883	24.75	0.4	1.45	8.15	0.0827586
'CT3003511'	3	20141024	2014	10	24	1	36009	2	0.3	121.883	24.7667	0.1	1.45	8.15	0.0206897
'CT3003511'	3	20141024	2014	10	24	1	36009	2	0.3	121.867	24.8	0.05	1.45	8.15	0.0103448
'CT3003511'	3	20141124	2014	11	24	1	36009	2	250	121.883	24.8667	0.2	8.15	11.8	6.13497
'CT3003511'	3	20141124	2014	11	24	1	36009	2	250	121.883	24.85	1	8.15	11.8	30.6748
'CT3003511'	3	20141124	2014	11	24	1	36009	2	250	121.867	24.85	0.3	8.15	11.8	9.20245
'CT3003511'	3	20141124	2014	11	24	1	36009	2	250	121.867	24.8333	1	8.15	11.8	30.6748
'CT3003511'	3	20141124	2014	11	24	1	36009	2	250	121.867	24.8167	1	8.15	11.8	30.6748
'CT3003511'	3	20141124	2014	11	24	1	36009	2	250	121.867	24.8	0.45	8.15	11.8	13.8037
'CT3003511'	3	20141124	2014	11	24	1	36009	2	250	121.883	24.8333	0.7	8.15	11.8	21.4724
'CT3003511'	3	20141124	2014	11	24	1	36009	2	250	121.9	24.8667	0.05	8.15	11.8	1.53374
'CT3003511'	3	20141124	2014	11	24	1	36009	2	250	121.867	24.7833	0.8	8.15	11.8	24.5399
'CT3003511'	3	20141124	2014	11	24	1	36009	2	250	121.867	24.7667	0.65	8.15	11.8	19.9387
'CT3003511'	3	20141124	2014	11	24	1	36009	2	250	121.883	24.7667	0.05	8.15	11.8	1.53374
'CT3003511'	3	20141124	2014	11	24	1	36009	2	250	121.883	24.75	0.35	8.15	11.8	10.7362
'CT3003511'	3	20141124	2014	11	24	1	36009	2	250	121.883	24.7333	0.4	8.15	11.8	12.2699
'CT3003511'	3	20141124	2014	11	24	1	36009	2	250	121.883	24.7167	0.1	8.15	11.8	3.06748
'CT3003511'	3	20141124	2014	11	24	1	36009	2	250	121.867	24.75	0.35	8.15	11.8	10.7362
'CT3003511'	3	20141124	2014	11	24	1	36009	2	250	121.883	24.8	0.35	8.15	11.8	10.7362
'CT3003511'	3	20141124	2014	11	24	1	36009	2	250	121.883	24.8167	0.4	8.15	11.8	12.2699
'CT3003511'	3	20141126	2014	11	26	1	36009	2	130	121.883	24.85	0.35	4.35	6.7	10.4598
'CT3003511'	3	20141126	2014	11	26	1	36009	2	130	121.883	24.8333	0.35	4.35	6.7	10.4598
'CT3003511'	3	20141126	2014	11	26	1	36009	2	130	121.867	24.8333	0.35	4.35	6.7	10.4598
'CT3003511'	3	20141126	2014	11	26	1	36009	2	130	121.867	24.8167	0.7	4.35	6.7	20.9195
'CT3003511'	3	20141126	2014	11	26	1	36009	2	130	121.867	24.8	0.75	4.35	6.7	22.4138
'CT3003511'	3	20141126	2014	11	26	1	36009	2	130	121.867	24.7833	0.75	4.35	6.7	22.4138
'CT3003511'	3	20141126	2014	11	26	1	36009	2	130	121.867	24.7667	0.6	4.35	6.7	17.931
'CT3003511'	3	20141126	2014	11	26	1	36009	2	130	121.867	24.75	0.1	4.35	6.7	2.98851
'CT3003511'	3	20141126	2014	11	26	1	36009	2	130	121.883	24.8667	0.1	4.35	6.7	2.98851
'CT3003511'	3	20141126	2014	11	26	1	36009	2	130	121.9	24.8667	0.25	4.35	6.7	7.47126
'CT3003511'	3	20141126	2014	11	26	1	36009	2	130	121.917	24.8667	0.05	4.35	6.7	1.49425
'CT3003674'	3	20140923	2014	9	23	1	36009	2	8	121.9	24.9167	0.2	4.6	5.8	0.347826
'CT3003674'	3	20140923	2014	9	23	1	36009	2	8	121.9	24.9	0.55	4.6	5.8	0.956522
'CT3003674'	3	20140923	2014	9	23	1	36009	2	8	121.883	24.9	0.2	4.6	5.8	0.347826
'CT3003674'	3	20140923	2014	9	23	1	36009	2	8	121.883	24.8833	0.65	4.6	5.8	1.13043
'CT3003674'	3	20140923	2014	9	23	1	36009	2	8	121.883	24.8667	0.15	4.6	5.8	0.26087
'CT3003674'	3	20140923	2014	9	23	1	36009	2	8	121.867	24.8667	0.7	4.6	5.8	1.21739
'CT3003674'	3	20140923	2014	9	23	1	36009	2	8	121.85	24.8667	0.1	4.6	5.8	0.173913
'CT3003674'	3	20140923	2014	9	23	1	36009	2	8	121.85	24.85	0.7	4.6	5.8	1.21739
'CT3003674'	3	20140923	2014	9	23	1	36009	2	8	121.85	24.8333	0.4	4.6	5.8	0.695652
'CT3003674'	3	20140923	2014	9	23	1	36009	2	8	121.833	24.8333	0.15	4.6	5.8	0.26087
'CT3003674'	3	20140923	2014	9	23	1	36009	2	8	121.833	24.8167	0.05	4.6	5.8	0.0869565
'CT3003674'	3	20140923	2014	9	23	1	36009	2	8	121.867	24.85	0.05	4.6	5.8	0.0869565
'CT3003674'	3	20140923	2014	9	23	1	36009	2	8	121.917	24.9167	0.15	4.6	5.8	0.26087
'CT3003674'	3	20140923	2014	9	23	1	36009	2	8	121.917	24.9333	0.2	4.6	5.8	0.347826
'CT3003674'	3	20140923	2014	9	23	1	36009	2	8	121.933	24.9333	0.3	4.6	5.8	0.521739
'CT3003674'	3	20140923	2014	9	23	1	36009	2	8	121.95	24.9333	0.05	4.6	5.8	0.0869565
'CT3003741'	3	20140928	2014	9	28	1	36009	2	15	121.883	24.6	0.1	4.25	10.05	0.352941
'CT3003741'	3	20140928	2014	9	28	1	36009	2	15	121.867	24.6	0.05	4.25	10.05	0.176471
'CT3003741'	3	20140928	2014	9	28	1	36009	2	15	121.833	24.6667	1.5	4.25	10.05	5.29412
'CT3003741'	3	20140928	2014	9	28	1	36009	2	15	121.833	24.6833	1.6	4.25	10.05	5.64706
'CT3003741'	3	20140928	2014	9	28	1	36009	2	15	121.85	24.6833	0.55	4.25	10.05	1.94118
'CT3003741'	3	20140928	2014	9	28	1	36009	2	15	121.833	24.7	0.1	4.25	10.05	0.352941
'CT3003741'	3	20140928	2014	9	28	1	36009	2	15	121.85	24.7	0.15	4.25	10.05	0.529412
'CT3003741'	3	20140928	2014	9	28	1	36009	2	15	121.85	24.6667	0.05	4.25	10.05	0.176471
'CT3003741'	3	20140928	2014	9	28	1	36009	2	15	121.85	24.65	0.15	4.25	10.05	0.529412
'CT3003947'	3	20140819	2014	8	19	1	36009	2	1	121.867	24.85	0.3	4.8	9.65	0.0625
'CT3003947'	3	20140819	2014	8	19	1	36009	2	1	121.867	24.8333	0.45	4.8	9.65	0.09375
'CT3003947'	3	20140819	2014	8	19	1	36009	2	1	121.867	24.8167	0.4	4.8	9.65	0.0833333
'CT3003947'	3	20140819	2014	8	19	1	36009	2	1	121.867	24.8	0.2	4.8	9.65	0.0416667
'CT3003947'	3	20140819	2014	8	19	1	36009	2	1	121.85	24.7833	0.35	4.8	9.65	0.0729167
'CT3003947'	3	20140819	2014	8	19	1	36009	2	1	121.85	24.7667	0.4	4.8	9.65	0.0833333
'CT3003947'	3	20140819	2014	8	19	1	36009	2	1	121.85	24.75	0.2	4.8	9.65	0.0416667
'CT3003947'	3	20140819	2014	8	19	1	36009	2	1	121.85	24.7333	0.5	4.8	9.65	0.104167
'CT3003947'	3	20140819	2014	8	19	1	36009	2	1	121.867	24.7167	0.35	4.8	9.65	0.0729167
'CT3003947'	3	20140819	2014	8	19	1	36009	2	1	121.867	24.7333	0.35	4.8	9.65	0.0729167
'CT3003947'	3	20140819	2014	8	19	1	36009	2	1	121.867	24.75	0.2	4.8	9.65	0.0416667
'CT3003947'	3	20140819	2014	8	19	1	36009	2	1	121.867	24.7667	0.25	4.8	9.65	0.0520833
'CT3003947'	3	20140819	2014	8	19	1	36009	2	1	121.867	24.7833	0.3	4.8	9.65	0.0625
'CT3003947'	3	20140819	2014	8	19	1	36009	2	1	121.85	24.8	0.05	4.8	9.65	0.0104167
'CT3003947'	3	20140819	2014	8	19	1	36009	2	1	121.85	24.8167	0.1	4.8	9.65	0.0208333
'CT3003947'	3	20140819	2014	8	19	1	36009	2	1	121.85	24.8333	0.25	4.8	9.65	0.0520833
'CT3003947'	3	20140819	2014	8	19	1	36009	2	1	121.85	24.85	0.1	4.8	9.65	0.0208333
'CT3003947'	3	20140819	2014	8	19	1	36009	2	1	121.85	24.8667	0.05	4.8	9.65	0.0104167
'CT3003947'	3	20141105	2014	11	5	1	36009	2	1	121.883	24.85	0.15	4.2	7.6	0.0357143
'CT3003947'	3	20141105	2014	11	5	1	36009	2	1	121.867	24.85	0.1	4.2	7.6	0.0238095
'CT3003947'	3	20141105	2014	11	5	1	36009	2	1	121.883	24.8333	0.7	4.2	7.6	0.166667
'CT3003947'	3	20141105	2014	11	5	1	36009	2	1	121.883	24.8167	0.75	4.2	7.6	0.178571
'CT3003947'	3	20141105	2014	11	5	1	36009	2	1	121.883	24.8	0.4	4.2	7.6	0.0952381
'CT3003947'	3	20141105	2014	11	5	1	36009	2	1	121.867	24.8	0.15	4.2	7.6	0.0357143
'CT3003947'	3	20141105	2014	11	5	1	36009	2	1	121.867	24.7833	0.2	4.2	7.6	0.047619
'CT3003947'	3	20141105	2014	11	5	1	36009	2	1	121.883	24.7833	0.45	4.2	7.6	0.107143
'CT3003947'	3	20141105	2014	11	5	1	36009	2	1	121.883	24.7667	0.75	4.2	7.6	0.178571
'CT3003947'	3	20141105	2014	11	5	1	36009	2	1	121.883	24.75	0.45	4.2	7.6	0.107143
'CT3003947'	3	20141105	2014	11	5	1	36009	2	1	121.9	24.75	0.05	4.2	7.6	0.0119048
'CT3003947'	3	20141105	2014	11	5	1	36009	2	1	121.9	24.7667	0.05	4.2	7.6	0.0119048
'CT3003953'	3	20141006	2014	10	6	1	36009	2	0.8	121.833	24.85	0.05	3.9	9.1575	0.0102564
'CT3003953'	3	20141006	2014	10	6	1	36009	2	0.8	121.817	24.8	0.05	3.9	9.1575	0.0102564
'CT3003953'	3	20141006	2014	10	6	1	36009	2	0.8	121.817	24.7833	0.75	3.9	9.1575	0.153846
'CT3003953'	3	20141006	2014	10	6	1	36009	2	0.8	121.85	24.65	0.75	3.9	9.1575	0.153846
'CT3003953'	3	20141006	2014	10	6	1	36009	2	0.8	121.85	24.7167	0.2	3.9	9.1575	0.0410256
'CT3003953'	3	20141006	2014	10	6	1	36009	2	0.8	121.817	24.7667	0.1	3.9	9.1575	0.0205128
'CT3003953'	3	20141006	2014	10	6	1	36009	2	0.8	121.833	24.7667	0.2	3.9	9.1575	0.0410256
'CT3003953'	3	20141006	2014	10	6	1	36009	2	0.8	121.833	24.75	0.3	3.9	9.1575	0.0615385
'CT3003953'	3	20141006	2014	10	6	1	36009	2	0.8	121.833	24.7333	0.4	3.9	9.1575	0.0820513
'CT3003953'	3	20141006	2014	10	6	1	36009	2	0.8	121.833	24.7167	0.15	3.9	9.1575	0.0307692
'CT3003953'	3	20141006	2014	10	6	1	36009	2	0.8	121.85	24.7	0.35	3.9	9.1575	0.0717949
'CT3003953'	3	20141006	2014	10	6	1	36009	2	0.8	121.85	24.6833	0.35	3.9	9.1575	0.0717949
'CT3003953'	3	20141006	2014	10	6	1	36009	2	0.8	121.85	24.6667	0.25	3.9	9.1575	0.0512821
'CT3003953'	3	20141007	2014	10	7	1	36009	2	3	121.833	24.8333	0.05	7.55	10.4078	0.0198675
'CT3003953'	3	20141007	2014	10	7	1	36009	2	3	121.833	24.8	0.05	7.55	10.4078	0.0198675
'CT3003953'	3	20141007	2014	10	7	1	36009	2	3	121.817	24.8	0.25	7.55	10.4078	0.0993377
'CT3003953'	3	20141007	2014	10	7	1	36009	2	3	121.817	24.7833	0.45	7.55	10.4078	0.178808
'CT3003953'	3	20141007	2014	10	7	1	36009	2	3	121.817	24.7667	0.55	7.55	10.4078	0.218543
'CT3003953'	3	20141007	2014	10	7	1	36009	2	3	121.817	24.75	0.4	7.55	10.4078	0.15894
'CT3003953'	3	20141007	2014	10	7	1	36009	2	3	121.833	24.75	0.05	7.55	10.4078	0.0198675
'CT3003953'	3	20141007	2014	10	7	1	36009	2	3	121.833	24.7333	0.4	7.55	10.4078	0.15894
'CT3003953'	3	20141007	2014	10	7	1	36009	2	3	121.833	24.7167	0.2	7.55	10.4078	0.0794702
'CT3003953'	3	20141007	2014	10	7	1	36009	2	3	121.85	24.7167	0.6	7.55	10.4078	0.238411
'CT3003953'	3	20141007	2014	10	7	1	36009	2	3	121.85	24.7	1.35	7.55	10.4078	0.536424
'CT3003953'	3	20141007	2014	10	7	1	36009	2	3	121.85	24.6833	1.3	7.55	10.4078	0.516556
'CT3003953'	3	20141007	2014	10	7	1	36009	2	3	121.85	24.6667	0.55	7.55	10.4078	0.218543
'CT3003953'	3	20141007	2014	10	7	1	36009	2	3	121.867	24.6667	1.15	7.55	10.4078	0.456954
'CT3003953'	3	20141007	2014	10	7	1	36009	2	3	121.867	24.65	0.2	7.55	10.4078	0.0794702
'CT3003953'	3	20141009	2014	10	9	1	36009	2	3	121.833	24.85	0.3	5.9	7.35556	0.152542
'CT3003953'	3	20141009	2014	10	9	1	36009	2	3	121.833	24.8333	0.8	5.9	7.35556	0.40678
'CT3003953'	3	20141009	2014	10	9	1	36009	2	3	121.833	24.8167	1.45	5.9	7.35556	0.737288
'CT3003953'	3	20141009	2014	10	9	1	36009	2	3	121.817	24.8167	0.1	5.9	7.35556	0.0508475
'CT3003953'	3	20141009	2014	10	9	1	36009	2	3	121.817	24.8	0.25	5.9	7.35556	0.127119
'CT3003953'	3	20141009	2014	10	9	1	36009	2	3	121.833	24.8	2	5.9	7.35556	1.01695
'CT3003953'	3	20141009	2014	10	9	1	36009	2	3	121.833	24.7833	0.9	5.9	7.35556	0.457627
'CT3003953'	3	20141009	2014	10	9	1	36009	2	3	121.817	24.7833	0.1	5.9	7.35556	0.0508475
'CT3003953'	3	20141020	2014	10	20	1	36009	2	220	121.833	24.75	0.35	2.6	5.55444	29.6154
'CT3003953'	3	20141020	2014	10	20	1	36009	2	220	121.833	24.7333	0.8	2.6	5.55444	67.6923
'CT3003953'	3	20141020	2014	10	20	1	36009	2	220	121.85	24.7	0.65	2.6	5.55444	55
'CT3003953'	3	20141020	2014	10	20	1	36009	2	220	121.85	24.7167	0.1	2.6	5.55444	8.46154
'CT3003953'	3	20141020	2014	10	20	1	36009	2	220	121.833	24.7167	0.5	2.6	5.55444	42.3077
'CT3003953'	3	20141020	2014	10	20	1	36009	2	220	121.817	24.75	0.15	2.6	5.55444	12.6923
'CT3003953'	3	20141020	2014	10	20	1	36009	2	220	121.817	24.7667	0.05	2.6	5.55444	4.23077
'CT3003953'	3	20141021	2014	10	21	1	36009	2	3	121.867	24.85	0.2	1.55	4.10333	0.387097
'CT3003953'	3	20141021	2014	10	21	1	36009	2	3	121.867	24.8333	0.3	1.55	4.10333	0.580645
'CT3003953'	3	20141021	2014	10	21	1	36009	2	3	121.867	24.8167	0.3	1.55	4.10333	0.580645
'CT3003953'	3	20141021	2014	10	21	1	36009	2	3	121.867	24.8	0.35	1.55	4.10333	0.677419
'CT3003953'	3	20141021	2014	10	21	1	36009	2	3	121.883	24.7833	0.4	1.55	4.10333	0.774194
'CT3003953'	3	20141107	2014	11	7	1	36009	2	300	121.867	24.8333	0.05	5.15	6.30389	2.91262
'CT3003953'	3	20141107	2014	11	7	1	36009	2	300	121.85	24.8333	0.25	5.15	6.30389	14.5631
'CT3003953'	3	20141107	2014	11	7	1	36009	2	300	121.85	24.8167	0.6	5.15	6.30389	34.9515
'CT3003953'	3	20141107	2014	11	7	1	36009	2	300	121.867	24.8167	0.5	5.15	6.30389	29.1262
'CT3003953'	3	20141107	2014	11	7	1	36009	2	300	121.867	24.8	0.75	5.15	6.30389	43.6893
'CT3003953'	3	20141107	2014	11	7	1	36009	2	300	121.85	24.7833	0.25	5.15	6.30389	14.5631
'CT3003953'	3	20141107	2014	11	7	1	36009	2	300	121.867	24.7833	0.35	5.15	6.30389	20.3883
'CT3003953'	3	20141107	2014	11	7	1	36009	2	300	121.867	24.7667	0.65	5.15	6.30389	37.8641
'CT3003953'	3	20141107	2014	11	7	1	36009	2	300	121.867	24.75	0.35	5.15	6.30389	20.3883
'CT3003953'	3	20141107	2014	11	7	1	36009	2	300	121.85	24.75	0.15	5.15	6.30389	8.73786
'CT3003953'	3	20141107	2014	11	7	1	36009	2	300	121.867	24.7333	0.3	5.15	6.30389	17.4757
'CT3003953'	3	20141107	2014	11	7	1	36009	2	300	121.867	24.7167	0.25	5.15	6.30389	14.5631
'CT3003953'	3	20141107	2014	11	7	1	36009	2	300	121.883	24.7167	0.15	5.15	6.30389	8.73786
'CT3003953'	3	20141107	2014	11	7	1	36009	2	300	121.883	24.7333	0.35	5.15	6.30389	20.3883
'CT3003953'	3	20141107	2014	11	7	1	36009	2	300	121.883	24.75	0.15	5.15	6.30389	8.73786
'CT3003953'	3	20141107	2014	11	7	1	36009	2	300	121.833	24.85	0.05	5.15	6.30389	2.91262
'CT3003953'	3	20141120	2014	11	20	1	36009	2	380	121.883	24.85	0.25	5.85	7.555	16.2393
'CT3003953'	3	20141120	2014	11	20	1	36009	2	380	121.867	24.85	0.1	5.85	7.555	6.49573
'CT3003953'	3	20141120	2014	11	20	1	36009	2	380	121.883	24.8333	0.2	5.85	7.555	12.9915
'CT3003953'	3	20141120	2014	11	20	1	36009	2	380	121.867	24.8333	0.1	5.85	7.555	6.49573
'CT3003953'	3	20141120	2014	11	20	1	36009	2	380	121.867	24.8167	0.7	5.85	7.555	45.4701
'CT3003953'	3	20141120	2014	11	20	1	36009	2	380	121.867	24.8	0.95	5.85	7.555	61.7094
'CT3003953'	3	20141120	2014	11	20	1	36009	2	380	121.867	24.7833	0.9	5.85	7.555	58.4615
'CT3003953'	3	20141120	2014	11	20	1	36009	2	380	121.867	24.7667	0.9	5.85	7.555	58.4615
'CT3003953'	3	20141120	2014	11	20	1	36009	2	380	121.883	24.7667	0.2	5.85	7.555	12.9915
'CT3003953'	3	20141120	2014	11	20	1	36009	2	380	121.883	24.75	0.3	5.85	7.555	19.4872
'CT3003953'	3	20141120	2014	11	20	1	36009	2	380	121.883	24.7333	0.45	5.85	7.555	29.2308
'CT3003953'	3	20141120	2014	11	20	1	36009	2	380	121.883	24.7167	0.2	5.85	7.555	12.9915
'CT3003953'	3	20141120	2014	11	20	1	36009	2	380	121.867	24.7333	0.2	5.85	7.555	12.9915
'CT3003953'	3	20141120	2014	11	20	1	36009	2	380	121.867	24.75	0.4	5.85	7.555	25.9829
'CT3003953'	3	20141121	2014	11	21	1	36009	2	400	121.867	24.85	0.05	5.65	7.55528	3.53982
'CT3003953'	3	20141121	2014	11	21	1	36009	2	400	121.867	24.8333	0.4	5.65	7.55528	28.3186
'CT3003953'	3	20141121	2014	11	21	1	36009	2	400	121.867	24.8167	0.4	5.65	7.55528	28.3186
'CT3003953'	3	20141121	2014	11	21	1	36009	2	400	121.867	24.8	0.8	5.65	7.55528	56.6372
'CT3003953'	3	20141121	2014	11	21	1	36009	2	400	121.867	24.7833	0.35	5.65	7.55528	24.7788
'CT3003953'	3	20141121	2014	11	21	1	36009	2	400	121.867	24.7667	0.55	5.65	7.55528	38.9381
'CT3003953'	3	20141121	2014	11	21	1	36009	2	400	121.867	24.75	0.35	5.65	7.55528	24.7788
'CT3003953'	3	20141121	2014	11	21	1	36009	2	400	121.867	24.7333	0.1	5.65	7.55528	7.07965
'CT3003953'	3	20141121	2014	11	21	1	36009	2	400	121.883	24.7333	0.2	5.65	7.55528	14.1593
'CT3003953'	3	20141121	2014	11	21	1	36009	2	400	121.883	24.75	0.4	5.65	7.55528	28.3186
'CT3003953'	3	20141121	2014	11	21	1	36009	2	400	121.883	24.7667	0.7	5.65	7.55528	49.5575
'CT3003953'	3	20141121	2014	11	21	1	36009	2	400	121.883	24.7833	0.6	5.65	7.55528	42.4779
'CT3003953'	3	20141121	2014	11	21	1	36009	2	400	121.883	24.8	0.2	5.65	7.55528	14.1593
'CT3003953'	3	20141121	2014	11	21	1	36009	2	400	121.883	24.8167	0.55	5.65	7.55528	38.9381
'CT3003953'	3	20141124	2014	11	24	1	36009	2	320	121.867	24.8167	0.65	10.85	12.7592	19.1705
'CT3003953'	3	20141124	2014	11	24	1	36009	2	320	121.867	24.8	1.8	10.85	12.7592	53.0876
'CT3003953'	3	20141124	2014	11	24	1	36009	2	320	121.883	24.8	0.15	10.85	12.7592	4.42396
'CT3003953'	3	20141124	2014	11	24	1	36009	2	320	121.883	24.7833	0.5	10.85	12.7592	14.7465
'CT3003953'	3	20141124	2014	11	24	1	36009	2	320	121.883	24.7667	0.05	10.85	12.7592	1.47465
'CT3003953'	3	20141124	2014	11	24	1	36009	2	320	121.867	24.7667	2.2	10.85	12.7592	64.8848
'CT3003953'	3	20141124	2014	11	24	1	36009	2	320	121.867	24.75	1.55	10.85	12.7592	45.7143
'CT3003953'	3	20141124	2014	11	24	1	36009	2	320	121.867	24.7333	0.1	10.85	12.7592	2.94931
'CT3003953'	3	20141124	2014	11	24	1	36009	2	320	121.867	24.7833	1.65	10.85	12.7592	48.6636
'CT3003953'	3	20141124	2014	11	24	1	36009	2	320	121.883	24.75	0.8	10.85	12.7592	23.5945
'CT3003953'	3	20141124	2014	11	24	1	36009	2	320	121.883	24.7333	1.25	10.85	12.7592	36.8664
'CT3003953'	3	20141124	2014	11	24	1	36009	2	320	121.883	24.7167	0.15	10.85	12.7592	4.42396
'CT3003973'	3	20141124	2014	11	24	1	36009	2	700	121.883	24.85	0.6	9.95	12.65	42.2111
'CT3003973'	3	20141124	2014	11	24	1	36009	2	700	121.883	24.8333	0.8	9.95	12.65	56.2814
'CT3003973'	3	20141124	2014	11	24	1	36009	2	700	121.867	24.8333	0.85	9.95	12.65	59.799
'CT3003973'	3	20141124	2014	11	24	1	36009	2	700	121.867	24.8167	0.95	9.95	12.65	66.8342
'CT3003973'	3	20141124	2014	11	24	1	36009	2	700	121.867	24.8	1.15	9.95	12.65	80.9045
'CT3003973'	3	20141124	2014	11	24	1	36009	2	700	121.867	24.7833	1	9.95	12.65	70.3518
'CT3003973'	3	20141124	2014	11	24	1	36009	2	700	121.883	24.8667	0.15	9.95	12.65	10.5528
'CT3003973'	3	20141124	2014	11	24	1	36009	2	700	121.867	24.85	0.2	9.95	12.65	14.0704
'CT3003973'	3	20141124	2014	11	24	1	36009	2	700	121.85	24.8333	0.05	9.95	12.65	3.51759
'CT3003973'	3	20141124	2014	11	24	1	36009	2	700	121.85	24.8167	0.35	9.95	12.65	24.6231
'CT3003973'	3	20141124	2014	11	24	1	36009	2	700	121.85	24.8	0.35	9.95	12.65	24.6231
'CT3003973'	3	20141124	2014	11	24	1	36009	2	700	121.85	24.7833	0.3	9.95	12.65	21.1055
'CT3003973'	3	20141124	2014	11	24	1	36009	2	700	121.85	24.7667	0.35	9.95	12.65	24.6231
'CT3003973'	3	20141124	2014	11	24	1	36009	2	700	121.867	24.7667	0.8	9.95	12.65	56.2814
'CT3003973'	3	20141124	2014	11	24	1	36009	2	700	121.883	24.7833	0.1	9.95	12.65	7.03518
'CT3003973'	3	20141124	2014	11	24	1	36009	2	700	121.883	24.8	0.35	9.95	12.65	24.6231
'CT3003973'	3	20141124	2014	11	24	1	36009	2	700	121.9	24.8	0.3	9.95	12.65	21.1055
'CT3003973'	3	20141124	2014	11	24	1	36009	2	700	121.917	24.8167	0.3	9.95	12.65	21.1055
'CT3003973'	3	20141124	2014	11	24	1	36009	2	700	121.917	24.8333	0.35	9.95	12.65	24.6231
'CT3003973'	3	20141124	2014	11	24	1	36009	2	700	121.917	24.85	0.05	9.95	12.65	3.51759
'CT3003973'	3	20141124	2014	11	24	1	36009	2	700	121.9	24.85	0.05	9.95	12.65	3.51759
'CT3003973'	3	20141124	2014	11	24	1	36009	2	700	121.9	24.8333	0.15	9.95	12.65	10.5528
'CT3003973'	3	20141124	2014	11	24	1	36009	2	700	121.883	24.8167	0.35	9.95	12.65	24.6231
'CT3003973'	3	20141124	2014	11	24	1	36009	2	700	121.867	24.75	0.05	9.95	12.65	3.51759
'CT3003973'	3	20141126	2014	11	26	1	36009	2	150	121.883	24.85	0.3	2	6.7	22.5
'CT3003973'	3	20141126	2014	11	26	1	36009	2	150	121.867	24.85	0.1	2	6.7	7.5
'CT3003973'	3	20141126	2014	11	26	1	36009	2	150	121.867	24.8333	0.35	2	6.7	26.25
'CT3003973'	3	20141126	2014	11	26	1	36009	2	150	121.867	24.8167	0.4	2	6.7	30
'CT3003973'	3	20141126	2014	11	26	1	36009	2	150	121.867	24.8	0.4	2	6.7	30
'CT3003973'	3	20141126	2014	11	26	1	36009	2	150	121.867	24.7833	0.05	2	6.7	3.75
'CT3003973'	3	20141126	2014	11	26	1	36009	2	150	121.883	24.8667	0.05	2	6.7	3.75
'CT3003973'	3	20141126	2014	11	26	1	36009	2	150	121.9	24.8667	0.3	2	6.7	22.5
'CT3003973'	3	20141126	2014	11	26	1	36009	2	150	121.9	24.8833	0.05	2	6.7	3.75
'CT3003973'	3	20141201	2014	12	1	1	36009	2	3	121.867	24.8333	0.1	5	7.35	0.06
'CT3003973'	3	20141201	2014	12	1	1	36009	2	3	121.867	24.8167	0.2	5	7.35	0.12
'CT3003973'	3	20141201	2014	12	1	1	36009	2	3	121.85	24.8167	1	5	7.35	0.6
'CT3003973'	3	20141201	2014	12	1	1	36009	2	3	121.85	24.8	1.1	5	7.35	0.66
'CT3003973'	3	20141201	2014	12	1	1	36009	2	3	121.85	24.7833	1	5	7.35	0.6
'CT3003973'	3	20141201	2014	12	1	1	36009	2	3	121.85	24.7667	0.85	5	7.35	0.51
'CT3003973'	3	20141201	2014	12	1	1	36009	2	3	121.85	24.75	0.75	5	7.35	0.45
'CT3003973'	3	20141202	2014	12	2	1	36009	2	21	121.867	24.8333	0.4	4.7	7	1.78723
'CT3003973'	3	20141202	2014	12	2	1	36009	2	21	121.867	24.8167	0.6	4.7	7	2.68085
'CT3003973'	3	20141202	2014	12	2	1	36009	2	21	121.85	24.8167	0.15	4.7	7	0.670213
'CT3003973'	3	20141202	2014	12	2	1	36009	2	21	121.85	24.8	0.5	4.7	7	2.23404
'CT3003973'	3	20141202	2014	12	2	1	36009	2	21	121.85	24.7833	0.5	4.7	7	2.23404
'CT3003973'	3	20141202	2014	12	2	1	36009	2	21	121.85	24.7667	0.75	4.7	7	3.35106
'CT3003973'	3	20141202	2014	12	2	1	36009	2	21	121.867	24.7667	0.05	4.7	7	0.223404
'CT3003973'	3	20141202	2014	12	2	1	36009	2	21	121.867	24.75	0.25	4.7	7	1.11702
'CT3003973'	3	20141202	2014	12	2	1	36009	2	21	121.867	24.7833	0.45	4.7	7	2.01064
'CT3003973'	3	20141202	2014	12	2	1	36009	2	21	121.867	24.8	0.4	4.7	7	1.78723
'CT3003973'	3	20141202	2014	12	2	1	36009	2	21	121.883	24.8333	0.35	4.7	7	1.56383
'CT3003973'	3	20141202	2014	12	2	1	36009	2	21	121.883	24.85	0.3	4.7	7	1.34043
'CT3003991'	3	20140509	2014	5	9	1	36009	2	2	121.883	24.8167	0.15	6.15	8.55	0.0487805
'CT3003991'	3	20140509	2014	5	9	1	36009	2	2	121.883	24.8	0.4	6.15	8.55	0.130081
'CT3003991'	3	20140509	2014	5	9	1	36009	2	2	121.883	24.7833	0.45	6.15	8.55	0.146341
'CT3003991'	3	20140509	2014	5	9	1	36009	2	2	121.883	24.7667	0.2	6.15	8.55	0.0650407
'CT3003991'	3	20140509	2014	5	9	1	36009	2	2	121.9	24.7667	0.6	6.15	8.55	0.195122
'CT3003991'	3	20140509	2014	5	9	1	36009	2	2	121.9	24.75	0.25	6.15	8.55	0.0813008
'CT3003991'	3	20140509	2014	5	9	1	36009	2	2	121.917	24.75	0.75	6.15	8.55	0.243902
'CT3003991'	3	20140509	2014	5	9	1	36009	2	2	121.933	24.75	0.85	6.15	8.55	0.276423
'CT3003991'	3	20140509	2014	5	9	1	36009	2	2	121.95	24.75	0.55	6.15	8.55	0.178862
'CT3003991'	3	20140509	2014	5	9	1	36009	2	2	121.967	24.75	0.35	6.15	8.55	0.113821
'CT3003991'	3	20140509	2014	5	9	1	36009	2	2	121.983	24.7667	0.25	6.15	8.55	0.0813008
'CT3003991'	3	20140509	2014	5	9	1	36009	2	2	121.967	24.7667	0.3	6.15	8.55	0.097561
'CT3003991'	3	20140509	2014	5	9	1	36009	2	2	121.95	24.7667	0.3	6.15	8.55	0.097561
'CT3003991'	3	20140509	2014	5	9	1	36009	2	2	121.9	24.7833	0.55	6.15	8.55	0.178862
'CT3003991'	3	20140509	2014	5	9	1	36009	2	2	121.9	24.8	0.2	6.15	8.55	0.0650407
'CT3003991'	3	20141124	2014	11	24	1	36009	2	280	121.867	24.85	0.75	9.05	11.7	23.2044
'CT3003991'	3	20141124	2014	11	24	1	36009	2	280	121.867	24.8333	1.2	9.05	11.7	37.1271
'CT3003991'	3	20141124	2014	11	24	1	36009	2	280	121.867	24.8167	1.05	9.05	11.7	32.4862
'CT3003991'	3	20141124	2014	11	24	1	36009	2	280	121.867	24.8	0.75	9.05	11.7	23.2044
'CT3003991'	3	20141124	2014	11	24	1	36009	2	280	121.883	24.85	0.75	9.05	11.7	23.2044
'CT3003991'	3	20141124	2014	11	24	1	36009	2	280	121.883	24.8667	0.35	9.05	11.7	10.8287
'CT3003991'	3	20141124	2014	11	24	1	36009	2	280	121.85	24.8333	0.1	9.05	11.7	3.09392
'CT3003991'	3	20141124	2014	11	24	1	36009	2	280	121.85	24.8167	0.35	9.05	11.7	10.8287
'CT3003991'	3	20141124	2014	11	24	1	36009	2	280	121.85	24.8	0.35	9.05	11.7	10.8287
'CT3003991'	3	20141124	2014	11	24	1	36009	2	280	121.85	24.7833	0.35	9.05	11.7	10.8287
'CT3003991'	3	20141124	2014	11	24	1	36009	2	280	121.867	24.7833	0.9	9.05	11.7	27.8453
'CT3003991'	3	20141124	2014	11	24	1	36009	2	280	121.867	24.7667	0.75	9.05	11.7	23.2044
'CT3003991'	3	20141124	2014	11	24	1	36009	2	280	121.867	24.75	0.65	9.05	11.7	20.1105
'CT3003991'	3	20141124	2014	11	24	1	36009	2	280	121.867	24.7333	0.55	9.05	11.7	17.0166
'CT3003991'	3	20141124	2014	11	24	1	36009	2	280	121.883	24.8333	0.2	9.05	11.7	6.18785
'CT3003991'	3	20141127	2014	11	27	1	36009	2	150	121.883	24.85	0.25	5	8.45	7.5
'CT3003991'	3	20141127	2014	11	27	1	36009	2	150	121.883	24.8333	0.2	5	8.45	6
'CT3003991'	3	20141127	2014	11	27	1	36009	2	150	121.883	24.8167	0.3	5	8.45	9
'CT3003991'	3	20141127	2014	11	27	1	36009	2	150	121.883	24.8	0.8	5	8.45	24
'CT3003991'	3	20141127	2014	11	27	1	36009	2	150	121.883	24.7833	0.95	5	8.45	28.5
'CT3003991'	3	20141127	2014	11	27	1	36009	2	150	121.883	24.7667	0.9	5	8.45	27
'CT3003991'	3	20141127	2014	11	27	1	36009	2	150	121.883	24.75	0.45	5	8.45	13.5
'CT3003991'	3	20141127	2014	11	27	1	36009	2	150	121.883	24.7333	0.45	5	8.45	13.5
'CT3003991'	3	20141127	2014	11	27	1	36009	2	150	121.9	24.7333	0.1	5	8.45	3
'CT3003991'	3	20141127	2014	11	27	1	36009	2	150	121.9	24.75	0.45	5	8.45	13.5
'CT3003991'	3	20141127	2014	11	27	1	36009	2	150	121.9	24.7667	0.15	5	8.45	4.5
'CT3003991'	3	20141202	2014	12	2	1	36009	2	20.5	121.867	24.85	0.1	3.85	8.05	0.532468
'CT3003991'	3	20141202	2014	12	2	1	36009	2	20.5	121.867	24.8333	0.35	3.85	8.05	1.86364
'CT3003991'	3	20141202	2014	12	2	1	36009	2	20.5	121.85	24.8167	0.55	3.85	8.05	2.92857
'CT3003991'	3	20141202	2014	12	2	1	36009	2	20.5	121.85	24.8	0.75	3.85	8.05	3.99351
'CT3003991'	3	20141202	2014	12	2	1	36009	2	20.5	121.85	24.7833	0.65	3.85	8.05	3.46104
'CT3003991'	3	20141202	2014	12	2	1	36009	2	20.5	121.85	24.7667	0.6	3.85	8.05	3.19481
'CT3003991'	3	20141202	2014	12	2	1	36009	2	20.5	121.867	24.7667	0.2	3.85	8.05	1.06494
'CT3003991'	3	20141202	2014	12	2	1	36009	2	20.5	121.867	24.75	0.3	3.85	8.05	1.5974
'CT3003991'	3	20141202	2014	12	2	1	36009	2	20.5	121.85	24.75	0.1	3.85	8.05	0.532468
'CT3003991'	3	20141202	2014	12	2	1	36009	2	20.5	121.867	24.8167	0.25	3.85	8.05	1.33117
'CT3004245'	3	20141007	2014	10	7	1	36009	2	4	121.917	24.8833	0.05	2.9	7.3	0.0689655
'CT3004245'	3	20141007	2014	10	7	1	36009	2	4	121.917	24.8667	0.25	2.9	7.3	0.344828
'CT3004245'	3	20141007	2014	10	7	1	36009	2	4	121.917	24.85	0.05	2.9	7.3	0.0689655
'CT3004245'	3	20141007	2014	10	7	1	36009	2	4	121.9	24.8333	0.6	2.9	7.3	0.827586
'CT3004245'	3	20141007	2014	10	7	1	36009	2	4	121.9	24.8167	0.25	2.9	7.3	0.344828
'CT3004245'	3	20141007	2014	10	7	1	36009	2	4	121.883	24.8167	0.55	2.9	7.3	0.758621
'CT3004245'	3	20141007	2014	10	7	1	36009	2	4	121.883	24.8	0.55	2.9	7.3	0.758621
'CT3004245'	3	20141007	2014	10	7	1	36009	2	4	121.883	24.7833	0.05	2.9	7.3	0.0689655
'CT3004245'	3	20141007	2014	10	7	1	36009	2	4	121.867	24.8	0.05	2.9	7.3	0.0689655
'CT3004245'	3	20141007	2014	10	7	1	36009	2	4	121.883	24.8333	0.15	2.9	7.3	0.206897
'CT3004245'	3	20141007	2014	10	7	1	36009	2	4	121.9	24.85	0.35	2.9	7.3	0.482759
'CT3004264'	3	20140923	2014	9	23	1	36009	2	10	121.9	24.9	0.6	5.95	8.5	1.0084
'CT3004264'	3	20140923	2014	9	23	1	36009	2	10	121.883	24.9	0.15	5.95	8.5	0.252101
'CT3004264'	3	20140923	2014	9	23	1	36009	2	10	121.883	24.8833	0.75	5.95	8.5	1.2605
'CT3004264'	3	20140923	2014	9	23	1	36009	2	10	121.883	24.8667	0.25	5.95	8.5	0.420168
'CT3004264'	3	20140923	2014	9	23	1	36009	2	10	121.867	24.8667	0.65	5.95	8.5	1.09244
'CT3004264'	3	20140923	2014	9	23	1	36009	2	10	121.85	24.85	0.5	5.95	8.5	0.840336
'CT3004264'	3	20140923	2014	9	23	1	36009	2	10	121.85	24.8333	0.65	5.95	8.5	1.09244
'CT3004264'	3	20140923	2014	9	23	1	36009	2	10	121.85	24.8167	0.6	5.95	8.5	1.0084
'CT3004264'	3	20140923	2014	9	23	1	36009	2	10	121.85	24.8	0.4	5.95	8.5	0.672269
'CT3004264'	3	20140923	2014	9	23	1	36009	2	10	121.85	24.7833	0.05	5.95	8.5	0.0840336
'CT3004264'	3	20140923	2014	9	23	1	36009	2	10	121.833	24.8	0.15	5.95	8.5	0.252101
'CT3004264'	3	20140923	2014	9	23	1	36009	2	10	121.867	24.85	0.25	5.95	8.5	0.420168
'CT3004264'	3	20140923	2014	9	23	1	36009	2	10	121.9	24.9167	0.15	5.95	8.5	0.252101
'CT3004264'	3	20140923	2014	9	23	1	36009	2	10	121.917	24.9167	0.25	5.95	8.5	0.420168
'CT3004264'	3	20140923	2014	9	23	1	36009	2	10	121.917	24.9333	0.1	5.95	8.5	0.168067
'CT3004264'	3	20140923	2014	9	23	1	36009	2	10	121.933	24.9333	0.35	5.95	8.5	0.588235
'CT3004264'	3	20140923	2014	9	23	1	36009	2	10	121.95	24.9333	0.05	5.95	8.5	0.0840336
'CT3004264'	3	20140923	2014	9	23	1	36009	2	10	121.95	24.95	0.05	5.95	8.5	0.0840336
'CT3004270'	3	20141014	2014	10	14	1	36009	2	1	121.917	24.9167	0.5	4.25	5.83528	0.117647
'CT3004270'	3	20141014	2014	10	14	1	36009	2	1	121.917	24.9	0.85	4.25	5.83528	0.2
'CT3004270'	3	20141014	2014	10	14	1	36009	2	1	121.9	24.9	0.9	4.25	5.83528	0.211765
'CT3004270'	3	20141014	2014	10	14	1	36009	2	1	121.9	24.8833	0.7	4.25	5.83528	0.164706
'CT3004270'	3	20141014	2014	10	14	1	36009	2	1	121.883	24.8833	0.35	4.25	5.83528	0.0823529
'CT3004270'	3	20141014	2014	10	14	1	36009	2	1	121.883	24.8667	0.3	4.25	5.83528	0.0705882
'CT3004270'	3	20141014	2014	10	14	1	36009	2	1	121.933	24.9167	0.45	4.25	5.83528	0.105882
'CT3004270'	3	20141014	2014	10	14	1	36009	2	1	121.95	24.9167	0.2	4.25	5.83528	0.0470588
'CT3004359'	3	20140128	2014	1	28	1	36009	2	2.5	121.833	24.8167	0.55	6.7	8.8875	0.205224
'CT3004359'	3	20140128	2014	1	28	1	36009	2	2.5	121.833	24.8	1.3	6.7	8.8875	0.485075
'CT3004359'	3	20140128	2014	1	28	1	36009	2	2.5	121.833	24.7833	1	6.7	8.8875	0.373134
'CT3004359'	3	20140128	2014	1	28	1	36009	2	2.5	121.817	24.7833	0.3	6.7	8.8875	0.11194
'CT3004359'	3	20140128	2014	1	28	1	36009	2	2.5	121.817	24.7667	0.6	6.7	8.8875	0.223881
'CT3004359'	3	20140128	2014	1	28	1	36009	2	2.5	121.817	24.75	0.45	6.7	8.8875	0.16791
'CT3004359'	3	20140128	2014	1	28	1	36009	2	2.5	121.817	24.7333	0.2	6.7	8.8875	0.0746269
'CT3004359'	3	20140128	2014	1	28	1	36009	2	2.5	121.833	24.7333	0.15	6.7	8.8875	0.0559701
'CT3004359'	3	20140128	2014	1	28	1	36009	2	2.5	121.833	24.75	0.4	6.7	8.8875	0.149254
'CT3004359'	3	20140128	2014	1	28	1	36009	2	2.5	121.833	24.7667	0.7	6.7	8.8875	0.261194
'CT3004359'	3	20140128	2014	1	28	1	36009	2	2.5	121.85	24.8167	0.25	6.7	8.8875	0.0932836
'CT3004359'	3	20140128	2014	1	28	1	36009	2	2.5	121.85	24.8	0.3	6.7	8.8875	0.11194
'CT3004359'	3	20140128	2014	1	28	1	36009	2	2.5	121.85	24.8333	0.5	6.7	8.8875	0.186567
'CT3004359'	3	20140507	2014	5	7	1	36009	2	1.7	121.833	24.8167	0.75	6.3	8.74056	0.202381
'CT3004359'	3	20140507	2014	5	7	1	36009	2	1.7	121.833	24.8	1.05	6.3	8.74056	0.283333
'CT3004359'	3	20140507	2014	5	7	1	36009	2	1.7	121.817	24.8	0.15	6.3	8.74056	0.0404762
'CT3004359'	3	20140507	2014	5	7	1	36009	2	1.7	121.833	24.7833	0.4	6.3	8.74056	0.107937
'CT3004359'	3	20140507	2014	5	7	1	36009	2	1.7	121.833	24.8333	0.2	6.3	8.74056	0.0539683
'CT3004359'	3	20140507	2014	5	7	1	36009	2	1.7	121.85	24.8333	0.35	6.3	8.74056	0.0944444
'CT3004359'	3	20140507	2014	5	7	1	36009	2	1.7	121.85	24.85	0.4	6.3	8.74056	0.107937
'CT3004359'	3	20140507	2014	5	7	1	36009	2	1.7	121.85	24.8667	0.2	6.3	8.74056	0.0539683
'CT3004359'	3	20140507	2014	5	7	1	36009	2	1.7	121.867	24.8667	0.35	6.3	8.74056	0.0944444
'CT3004359'	3	20140507	2014	5	7	1	36009	2	1.7	121.867	24.8833	0.1	6.3	8.74056	0.0269841
'CT3004359'	3	20140507	2014	5	7	1	36009	2	1.7	121.883	24.8833	0.5	6.3	8.74056	0.134921
'CT3004359'	3	20140507	2014	5	7	1	36009	2	1.7	121.85	24.8167	0.75	6.3	8.74056	0.202381
'CT3004359'	3	20140507	2014	5	7	1	36009	2	1.7	121.85	24.8	0.65	6.3	8.74056	0.175397
'CT3004359'	3	20140507	2014	5	7	1	36009	2	1.7	121.833	24.7667	0.1	6.3	8.74056	0.0269841
'CT3004359'	3	20140507	2014	5	7	1	36009	2	1.7	121.85	24.7833	0.35	6.3	8.74056	0.0944444
'CT3004359'	3	20141021	2014	10	21	1	36009	2	1	121.85	24.8167	0.05	6.25	7.9925	0.008
'CT3004359'	3	20141021	2014	10	21	1	36009	2	1	121.867	24.8167	0.1	6.25	7.9925	0.016
'CT3004359'	3	20141021	2014	10	21	1	36009	2	1	121.867	24.8	0.8	6.25	7.9925	0.128
'CT3004359'	3	20141021	2014	10	21	1	36009	2	1	121.85	24.8	0.05	6.25	7.9925	0.008
'CT3004359'	3	20141021	2014	10	21	1	36009	2	1	121.867	24.7833	1.55	6.25	7.9925	0.248
'CT3004359'	3	20141021	2014	10	21	1	36009	2	1	121.85	24.7833	0.2	6.25	7.9925	0.032
'CT3004359'	3	20141021	2014	10	21	1	36009	2	1	121.85	24.7667	0.25	6.25	7.9925	0.04
'CT3004359'	3	20141021	2014	10	21	1	36009	2	1	121.867	24.7667	0.8	6.25	7.9925	0.128
'CT3004359'	3	20141021	2014	10	21	1	36009	2	1	121.867	24.75	1.15	6.25	7.9925	0.184
'CT3004359'	3	20141021	2014	10	21	1	36009	2	1	121.867	24.7333	0.9	6.25	7.9925	0.144
'CT3004359'	3	20141021	2014	10	21	1	36009	2	1	121.867	24.7167	0.35	6.25	7.9925	0.056
'CT3004359'	3	20141021	2014	10	21	1	36009	2	1	121.883	24.7833	0.05	6.25	7.9925	0.008
'CT3004359'	3	20141103	2014	11	3	1	36009	2	480	121.85	24.8167	0.7	5.9	7.44083	56.9492
'CT3004359'	3	20141103	2014	11	3	1	36009	2	480	121.85	24.8	0.9	5.9	7.44083	73.2203
'CT3004359'	3	20141103	2014	11	3	1	36009	2	480	121.85	24.7833	1.1	5.9	7.44083	89.4915
'CT3004359'	3	20141103	2014	11	3	1	36009	2	480	121.85	24.7667	0.75	5.9	7.44083	61.0169
'CT3004359'	3	20141103	2014	11	3	1	36009	2	480	121.85	24.75	0.3	5.9	7.44083	24.4068
'CT3004359'	3	20141103	2014	11	3	1	36009	2	480	121.867	24.75	0.9	5.9	7.44083	73.2203
'CT3004359'	3	20141103	2014	11	3	1	36009	2	480	121.867	24.7333	0.45	5.9	7.44083	36.6102
'CT3004359'	3	20141103	2014	11	3	1	36009	2	480	121.883	24.7333	0.2	5.9	7.44083	16.2712
'CT3004359'	3	20141103	2014	11	3	1	36009	2	480	121.867	24.7667	0.4	5.9	7.44083	32.5424
'CT3004359'	3	20141103	2014	11	3	1	36009	2	480	121.867	24.8167	0.2	5.9	7.44083	16.2712
'CT3004359'	3	20141104	2014	11	4	1	36009	2	10	121.85	24.8167	0.15	5.45	7.19167	0.275229
'CT3004359'	3	20141104	2014	11	4	1	36009	2	10	121.85	24.8	0.5	5.45	7.19167	0.917431
'CT3004359'	3	20141104	2014	11	4	1	36009	2	10	121.867	24.8	0.55	5.45	7.19167	1.00917
'CT3004359'	3	20141104	2014	11	4	1	36009	2	10	121.85	24.7833	0.55	5.45	7.19167	1.00917
'CT3004359'	3	20141104	2014	11	4	1	36009	2	10	121.85	24.7667	0.15	5.45	7.19167	0.275229
'CT3004359'	3	20141104	2014	11	4	1	36009	2	10	121.867	24.7667	0.9	5.45	7.19167	1.65138
'CT3004359'	3	20141104	2014	11	4	1	36009	2	10	121.867	24.75	1	5.45	7.19167	1.83486
'CT3004359'	3	20141104	2014	11	4	1	36009	2	10	121.867	24.7333	0.45	5.45	7.19167	0.825688
'CT3004359'	3	20141104	2014	11	4	1	36009	2	10	121.883	24.75	0.05	5.45	7.19167	0.0917431
'CT3004359'	3	20141104	2014	11	4	1	36009	2	10	121.867	24.7833	0.55	5.45	7.19167	1.00917
'CT3004359'	3	20141104	2014	11	4	1	36009	2	10	121.883	24.8	0.4	5.45	7.19167	0.733945
'CT3004359'	3	20141104	2014	11	4	1	36009	2	10	121.883	24.8167	0.2	5.45	7.19167	0.366972
'CT3004359'	3	20141105	2014	11	5	1	36009	2	15	121.867	24.8	0.7	5.55	7.04167	1.89189
'CT3004359'	3	20141105	2014	11	5	1	36009	2	15	121.867	24.7833	1.55	5.55	7.04167	4.18919
'CT3004359'	3	20141105	2014	11	5	1	36009	2	15	121.867	24.7667	1.15	5.55	7.04167	3.10811
'CT3004359'	3	20141105	2014	11	5	1	36009	2	15	121.867	24.75	0.7	5.55	7.04167	1.89189
'CT3004359'	3	20141105	2014	11	5	1	36009	2	15	121.867	24.7333	0.6	5.55	7.04167	1.62162
'CT3004359'	3	20141105	2014	11	5	1	36009	2	15	121.867	24.7167	0.3	5.55	7.04167	0.810811
'CT3004359'	3	20141105	2014	11	5	1	36009	2	15	121.883	24.7167	0.05	5.55	7.04167	0.135135
'CT3004359'	3	20141105	2014	11	5	1	36009	2	15	121.883	24.7333	0.2	5.55	7.04167	0.540541
'CT3004359'	3	20141105	2014	11	5	1	36009	2	15	121.883	24.75	0.3	5.55	7.04167	0.810811
'CT3004359'	3	20141120	2014	11	20	1	36009	2	2	121.867	24.8	0.05	6.05	7.69083	0.0165289
'CT3004359'	3	20141120	2014	11	20	1	36009	2	2	121.867	24.7833	0.35	6.05	7.69083	0.115702
'CT3004359'	3	20141120	2014	11	20	1	36009	2	2	121.85	24.7833	0.65	6.05	7.69083	0.214876
'CT3004359'	3	20141120	2014	11	20	1	36009	2	2	121.85	24.7667	1	6.05	7.69083	0.330579
'CT3004359'	3	20141120	2014	11	20	1	36009	2	2	121.85	24.75	0.4	6.05	7.69083	0.132231
'CT3004359'	3	20141120	2014	11	20	1	36009	2	2	121.85	24.7333	0.15	6.05	7.69083	0.0495868
'CT3004359'	3	20141120	2014	11	20	1	36009	2	2	121.867	24.7333	0.75	6.05	7.69083	0.247934
'CT3004359'	3	20141120	2014	11	20	1	36009	2	2	121.867	24.7167	0.25	6.05	7.69083	0.0826446
'CT3004359'	3	20141120	2014	11	20	1	36009	2	2	121.867	24.75	0.5	6.05	7.69083	0.165289
'CT3004359'	3	20141120	2014	11	20	1	36009	2	2	121.85	24.8	0.65	6.05	7.69083	0.214876
'CT3004359'	3	20141120	2014	11	20	1	36009	2	2	121.85	24.8167	1.3	6.05	7.69083	0.429752
'CT3004359'	3	20141126	2014	11	26	1	36009	2	7	121.867	24.8167	0.25	6	7.69111	0.291667
'CT3004359'	3	20141126	2014	11	26	1	36009	2	7	121.867	24.8	1.1	6	7.69111	1.28333
'CT3004359'	3	20141126	2014	11	26	1	36009	2	7	121.867	24.7833	0.85	6	7.69111	0.991667
'CT3004359'	3	20141126	2014	11	26	1	36009	2	7	121.867	24.7667	0.9	6	7.69111	1.05
'CT3004359'	3	20141126	2014	11	26	1	36009	2	7	121.85	24.7667	0.15	6	7.69111	0.175
'CT3004359'	3	20141126	2014	11	26	1	36009	2	7	121.85	24.75	0.55	6	7.69111	0.641667
'CT3004359'	3	20141126	2014	11	26	1	36009	2	7	121.85	24.7333	0.15	6	7.69111	0.175
'CT3004359'	3	20141126	2014	11	26	1	36009	2	7	121.867	24.7333	0.75	6	7.69111	0.875
'CT3004359'	3	20141126	2014	11	26	1	36009	2	7	121.867	24.7167	0.35	6	7.69111	0.408333
'CT3004359'	3	20141126	2014	11	26	1	36009	2	7	121.867	24.75	0.4	6	7.69111	0.466667
'CT3004359'	3	20141126	2014	11	26	1	36009	2	7	121.85	24.8	0.55	6	7.69111	0.641667
'CT3004359'	3	20141127	2014	11	27	1	36009	2	0.3	121.867	24.8	1.1	6	7.44139	0.055
'CT3004359'	3	20141127	2014	11	27	1	36009	2	0.3	121.867	24.7833	0.9	6	7.44139	0.045
'CT3004359'	3	20141127	2014	11	27	1	36009	2	0.3	121.867	24.7667	0.9	6	7.44139	0.045
'CT3004359'	3	20141127	2014	11	27	1	36009	2	0.3	121.867	24.75	0.45	6	7.44139	0.0225
'CT3004359'	3	20141127	2014	11	27	1	36009	2	0.3	121.85	24.75	0.6	6	7.44139	0.03
'CT3004359'	3	20141127	2014	11	27	1	36009	2	0.3	121.85	24.7333	0.3	6	7.44139	0.015
'CT3004359'	3	20141127	2014	11	27	1	36009	2	0.3	121.867	24.7333	0.7	6	7.44139	0.035
'CT3004359'	3	20141127	2014	11	27	1	36009	2	0.3	121.867	24.7167	0.5	6	7.44139	0.025
'CT3004359'	3	20141127	2014	11	27	1	36009	2	0.3	121.883	24.7167	0.05	6	7.44139	0.0025
'CT3004359'	3	20141127	2014	11	27	1	36009	2	0.3	121.883	24.7333	0.05	6	7.44139	0.0025
'CT3004359'	3	20141127	2014	11	27	1	36009	2	0.3	121.867	24.8167	0.2	6	7.44139	0.01
'CT3004359'	3	20141127	2014	11	27	1	36009	2	0.3	121.85	24.8	0.25	6	7.44139	0.0125
'CT3005057'	3	20140926	2014	9	26	1	36009	2	6.5	121.917	24.9167	0.25	0.55	1.45	2.95455
'CT3005057'	3	20140926	2014	9	26	1	36009	2	6.5	121.917	24.9	0.2	0.55	1.45	2.36364
'CT3005057'	3	20140926	2014	9	26	1	36009	2	6.5	121.933	24.9167	0.1	0.55	1.45	1.18182
'CT3005057'	3	20141008	2014	10	8	1	36009	2	3.5	121.867	24.8667	0.55	3.85	5.7	0.5
'CT3005057'	3	20141008	2014	10	8	1	36009	2	3.5	121.85	24.85	0.55	3.85	5.7	0.5
'CT3005057'	3	20141008	2014	10	8	1	36009	2	3.5	121.85	24.8333	0.7	3.85	5.7	0.636364
'CT3005057'	3	20141008	2014	10	8	1	36009	2	3.5	121.833	24.8167	0.5	3.85	5.7	0.454545
'CT3005057'	3	20141008	2014	10	8	1	36009	2	3.5	121.833	24.8	0.6	3.85	5.7	0.545455
'CT3005057'	3	20141008	2014	10	8	1	36009	2	3.5	121.833	24.7833	0.6	3.85	5.7	0.545455
'CT3005057'	3	20141008	2014	10	8	1	36009	2	3.5	121.833	24.7667	0.1	3.85	5.7	0.0909091
'CT3005057'	3	20141008	2014	10	8	1	36009	2	3.5	121.85	24.8167	0.15	3.85	5.7	0.136364
'CT3005057'	3	20141008	2014	10	8	1	36009	2	3.5	121.867	24.85	0.1	3.85	5.7	0.0909091
'CT3005057'	3	20141021	2014	10	21	1	36009	2	1.5	121.917	24.9167	0.1	7.65	9.55	0.0196078
'CT3005057'	3	20141021	2014	10	21	1	36009	2	1.5	121.917	24.9	0.4	7.65	9.55	0.0784314
'CT3005057'	3	20141021	2014	10	21	1	36009	2	1.5	121.9	24.9	0.5	7.65	9.55	0.0980392
'CT3005057'	3	20141021	2014	10	21	1	36009	2	1.5	121.9	24.8833	0.4	7.65	9.55	0.0784314
'CT3005057'	3	20141021	2014	10	21	1	36009	2	1.5	121.883	24.8833	0.5	7.65	9.55	0.0980392
'CT3005057'	3	20141021	2014	10	21	1	36009	2	1.5	121.883	24.8667	0.45	7.65	9.55	0.0882353
'CT3005057'	3	20141021	2014	10	21	1	36009	2	1.5	121.867	24.8667	0.35	7.65	9.55	0.0686275
'CT3005057'	3	20141021	2014	10	21	1	36009	2	1.5	121.867	24.85	0.6	7.65	9.55	0.117647
'CT3005057'	3	20141021	2014	10	21	1	36009	2	1.5	121.85	24.85	0.15	7.65	9.55	0.0294118
'CT3005057'	3	20141021	2014	10	21	1	36009	2	1.5	121.85	24.8333	0.4	7.65	9.55	0.0784314
'CT3005057'	3	20141021	2014	10	21	1	36009	2	1.5	121.85	24.8167	0.65	7.65	9.55	0.127451
'CT3005057'	3	20141021	2014	10	21	1	36009	2	1.5	121.85	24.8	0.7	7.65	9.55	0.137255
'CT3005057'	3	20141021	2014	10	21	1	36009	2	1.5	121.85	24.7833	0.6	7.65	9.55	0.117647
'CT3005057'	3	20141021	2014	10	21	1	36009	2	1.5	121.85	24.7667	0.5	7.65	9.55	0.0980392
'CT3005057'	3	20141021	2014	10	21	1	36009	2	1.5	121.85	24.75	0.35	7.65	9.55	0.0686275
'CT3005057'	3	20141021	2014	10	21	1	36009	2	1.5	121.85	24.7333	0.05	7.65	9.55	0.00980392
'CT3005057'	3	20141021	2014	10	21	1	36009	2	1.5	121.867	24.7333	0.1	7.65	9.55	0.0196078
'CT3005057'	3	20141021	2014	10	21	1	36009	2	1.5	121.867	24.75	0.35	7.65	9.55	0.0686275
'CT3005057'	3	20141021	2014	10	21	1	36009	2	1.5	121.867	24.7667	0.2	7.65	9.55	0.0392157
'CT3005057'	3	20141021	2014	10	21	1	36009	2	1.5	121.867	24.8333	0.25	7.65	9.55	0.0490196
'CT3005057'	3	20141021	2014	10	21	1	36009	2	1.5	121.883	24.85	0.05	7.65	9.55	0.00980392
'CT3005057'	3	20141215	2014	12	15	1	36009	2	3	121.933	24.9167	0.55	7.95	9.55	0.207547
'CT3005057'	3	20141215	2014	12	15	1	36009	2	3	121.917	24.9167	0.5	7.95	9.55	0.188679
'CT3005057'	3	20141215	2014	12	15	1	36009	2	3	121.917	24.9	0.85	7.95	9.55	0.320755
'CT3005057'	3	20141215	2014	12	15	1	36009	2	3	121.9	24.9	0.75	7.95	9.55	0.283019
'CT3005057'	3	20141215	2014	12	15	1	36009	2	3	121.933	24.9	0.25	7.95	9.55	0.0943396
'CT3005057'	3	20141215	2014	12	15	1	36009	2	3	121.883	24.8833	0.5	7.95	9.55	0.188679
'CT3005057'	3	20141215	2014	12	15	1	36009	2	3	121.883	24.8667	0.35	7.95	9.55	0.132075
'CT3005057'	3	20141215	2014	12	15	1	36009	2	3	121.9	24.8833	0.7	7.95	9.55	0.264151
'CT3005057'	3	20141215	2014	12	15	1	36009	2	3	121.917	24.8833	0.05	7.95	9.55	0.0188679
'CT3005057'	3	20141215	2014	12	15	1	36009	2	3	121.9	24.8667	0.8	7.95	9.55	0.301887
'CT3005057'	3	20141215	2014	12	15	1	36009	2	3	121.883	24.85	0.85	7.95	9.55	0.320755
'CT3005057'	3	20141215	2014	12	15	1	36009	2	3	121.883	24.8333	0.35	7.95	9.55	0.132075
'CT3005057'	3	20141215	2014	12	15	1	36009	2	3	121.867	24.8333	0.75	7.95	9.55	0.283019
'CT3005057'	3	20141215	2014	12	15	1	36009	2	3	121.85	24.8167	0.35	7.95	9.55	0.132075
'CT3005057'	3	20141215	2014	12	15	1	36009	2	3	121.867	24.8167	0.3	7.95	9.55	0.113208
'CT3005057'	3	20141215	2014	12	15	1	36009	2	3	121.917	24.8667	0.05	7.95	9.55	0.0188679
'CT3005081'	3	20141007	2014	10	7	1	36009	2	2	121.917	24.9167	0.15	6.85	8.4	0.0437956
'CT3005081'	3	20141007	2014	10	7	1	36009	2	2	121.9	24.9167	0.1	6.85	8.4	0.0291971
'CT3005081'	3	20141007	2014	10	7	1	36009	2	2	121.9	24.9	0.75	6.85	8.4	0.218978
'CT3005081'	3	20141007	2014	10	7	1	36009	2	2	121.883	24.9	0.1	6.85	8.4	0.0291971
'CT3005081'	3	20141007	2014	10	7	1	36009	2	2	121.883	24.8833	0.8	6.85	8.4	0.233577
'CT3005081'	3	20141007	2014	10	7	1	36009	2	2	121.867	24.8667	0.4	6.85	8.4	0.116788
'CT3005081'	3	20141007	2014	10	7	1	36009	2	2	121.867	24.85	0.05	6.85	8.4	0.0145985
'CT3005081'	3	20141007	2014	10	7	1	36009	2	2	121.85	24.85	0.35	6.85	8.4	0.10219
'CT3005081'	3	20141007	2014	10	7	1	36009	2	2	121.85	24.8333	0.6	6.85	8.4	0.175182
'CT3005081'	3	20141007	2014	10	7	1	36009	2	2	121.833	24.8333	0.1	6.85	8.4	0.0291971
'CT3005081'	3	20141007	2014	10	7	1	36009	2	2	121.833	24.8167	0.35	6.85	8.4	0.10219
'CT3005081'	3	20141007	2014	10	7	1	36009	2	2	121.867	24.8333	0.35	6.85	8.4	0.10219
'CT3005081'	3	20141007	2014	10	7	1	36009	2	2	121.883	24.85	0.3	6.85	8.4	0.0875912
'CT3005081'	3	20141007	2014	10	7	1	36009	2	2	121.883	24.8667	0.5	6.85	8.4	0.145985
'CT3005081'	3	20141007	2014	10	7	1	36009	2	2	121.9	24.8833	1.1	6.85	8.4	0.321168
'CT3005081'	3	20141007	2014	10	7	1	36009	2	2	121.917	24.9	0.75	6.85	8.4	0.218978
'CT3005081'	3	20141007	2014	10	7	1	36009	2	2	121.933	24.9	0.05	6.85	8.4	0.0145985
'CT3005081'	3	20141007	2014	10	7	1	36009	2	2	121.9	24.8667	0.05	6.85	8.4	0.0145985
'CT4001177'	4	20141008	2014	10	8	1	36009	2	8	121.9	24.8833	0.15	2.15	7.1	0.55814
'CT4001177'	4	20141008	2014	10	8	1	36009	2	8	121.9	24.8667	0.8	2.15	7.1	2.97674
'CT4001177'	4	20141008	2014	10	8	1	36009	2	8	121.867	24.8333	0.85	2.15	7.1	3.16279
'CT4001177'	4	20141008	2014	10	8	1	36009	2	8	121.867	24.8167	0.1	2.15	7.1	0.372093
'CT4001177'	4	20141008	2014	10	8	1	36009	2	8	121.867	24.85	0.05	2.15	7.1	0.186047
'CT4001177'	4	20141008	2014	10	8	1	36009	2	8	121.883	24.85	0.1	2.15	7.1	0.372093
'CT4001177'	4	20141008	2014	10	8	1	36009	2	8	121.9	24.85	0.05	2.15	7.1	0.186047
'CT4001177'	4	20141008	2014	10	8	1	36009	2	8	121.917	24.8667	0.05	2.15	7.1	0.186047
'CT4002530'	4	20140919	2014	9	19	1	36009	2	55	121.967	24.6	0.25	5.3	10.35	2.59434
'CT4002530'	4	20140919	2014	9	19	1	36009	2	55	121.917	24.65	0.05	5.3	10.35	0.518868
'CT4002530'	4	20140919	2014	9	19	1	36009	2	55	121.867	24.7	0.15	5.3	10.35	1.5566
'CT4002530'	4	20140919	2014	9	19	1	36009	2	55	121.85	24.7	0.2	5.3	10.35	2.07547
'CT4002530'	4	20140919	2014	9	19	1	36009	2	55	121.85	24.7167	0.3	5.3	10.35	3.11321
'CT4002530'	4	20140919	2014	9	19	1	36009	2	55	121.85	24.7333	0.3	5.3	10.35	3.11321
'CT4002530'	4	20140919	2014	9	19	1	36009	2	55	121.833	24.7333	0.05	5.3	10.35	0.518868
'CT4002530'	4	20140919	2014	9	19	1	36009	2	55	121.833	24.75	0.2	5.3	10.35	2.07547
'CT4002530'	4	20140919	2014	9	19	1	36009	2	55	121.833	24.7667	0.25	5.3	10.35	2.59434
'CT4002530'	4	20140919	2014	9	19	1	36009	2	55	121.833	24.7833	0.3	5.3	10.35	3.11321
'CT4002530'	4	20140919	2014	9	19	1	36009	2	55	121.833	24.8	0.25	5.3	10.35	2.59434
'CT4002530'	4	20140919	2014	9	19	1	36009	2	55	121.833	24.8167	0.15	5.3	10.35	1.5566
'CT4002530'	4	20140919	2014	9	19	1	36009	2	55	121.85	24.8167	0.05	5.3	10.35	0.518868
'CT4002530'	4	20140919	2014	9	19	1	36009	2	55	121.85	24.8333	0.15	5.3	10.35	1.5566
'CT4002530'	4	20141006	2014	10	6	1	36009	2	195	121.867	24.8833	0.05	5.15	8.55	1.8932
'CT4002530'	4	20141006	2014	10	6	1	36009	2	195	121.883	24.8833	0.2	5.15	8.55	7.57282
'CT4002530'	4	20141006	2014	10	6	1	36009	2	195	121.883	24.9	0.2	5.15	8.55	7.57282
'CT4002530'	4	20141006	2014	10	6	1	36009	2	195	121.883	24.9167	0.1	5.15	8.55	3.78641
'CT4002530'	4	20141006	2014	10	6	1	36009	2	195	121.9	24.9167	0.2	5.15	8.55	7.57282
'CT4002530'	4	20141006	2014	10	6	1	36009	2	195	121.9	24.9333	0.1	5.15	8.55	3.78641
'CT4002530'	4	20141006	2014	10	6	1	36009	2	195	121.917	24.9333	0.3	5.15	8.55	11.3592
'CT4002530'	4	20141006	2014	10	6	1	36009	2	195	121.933	24.9333	0.05	5.15	8.55	1.8932
'CT4002530'	4	20141006	2014	10	6	1	36009	2	195	121.933	24.95	0.3	5.15	8.55	11.3592
'CT4002530'	4	20141006	2014	10	6	1	36009	2	195	121.95	24.95	0.4	5.15	8.55	15.1456
'CT4002530'	4	20141006	2014	10	6	1	36009	2	195	121.95	24.9667	0.1	5.15	8.55	3.78641
'CT4002530'	4	20141006	2014	10	6	1	36009	2	195	121.85	24.8167	0.25	5.15	8.55	9.46602
'CT4002530'	4	20141006	2014	10	6	1	36009	2	195	121.833	24.8167	0.15	5.15	8.55	5.67961
'CT4002530'	4	20141006	2014	10	6	1	36009	2	195	121.833	24.8	0.25	5.15	8.55	9.46602
'CT4002530'	4	20141006	2014	10	6	1	36009	2	195	121.85	24.8	0.3	5.15	8.55	11.3592
'CT4002530'	4	20141006	2014	10	6	1	36009	2	195	121.833	24.7833	0.5	5.15	8.55	18.932
'CT4002530'	4	20141006	2014	10	6	1	36009	2	195	121.85	24.7833	0.1	5.15	8.55	3.78641
'CT4002530'	4	20141006	2014	10	6	1	36009	2	195	121.85	24.7667	0.35	5.15	8.55	13.2524
'CT4002530'	4	20141006	2014	10	6	1	36009	2	195	121.85	24.75	0.6	5.15	8.55	22.7184
'CT4002530'	4	20141006	2014	10	6	1	36009	2	195	121.85	24.7333	0.2	5.15	8.55	7.57282
'CT4002530'	4	20141006	2014	10	6	1	36009	2	195	121.833	24.75	0.1	5.15	8.55	3.78641
'CT4002530'	4	20141006	2014	10	6	1	36009	2	195	121.833	24.7667	0.15	5.15	8.55	5.67961
'CT4002530'	4	20141006	2014	10	6	1	36009	2	195	121.85	24.8333	0.2	5.15	8.55	7.57282
'CT3004920'	3	20141202	2014	12	2	2	36009	2	10	121.183	25.1167	1.1	4.8	7.93639	2.29167
'CT3004920'	3	20141202	2014	12	2	2	36009	2	10	121.2	25.1167	0.5	4.8	7.93639	1.04167
'CT3004920'	3	20141202	2014	12	2	2	36009	2	10	121.183	25.1333	0.25	4.8	7.93639	0.520833
'CT3004920'	3	20141202	2014	12	2	2	36009	2	10	121.167	25.1	0.2	4.8	7.93639	0.416667
'CT3004920'	3	20141202	2014	12	2	2	36009	2	10	121.167	25.1167	1.25	4.8	7.93639	2.60417
'CT3004920'	3	20141202	2014	12	2	2	36009	2	10	121.183	25.1	0.05	4.8	7.93639	0.104167
'CT3004920'	3	20141202	2014	12	2	2	36009	2	10	121.217	25.1167	0.5	4.8	7.93639	1.04167
'CT3004920'	3	20141202	2014	12	2	2	36009	2	10	121.233	25.1167	0.15	4.8	7.93639	0.3125
'CT3004920'	3	20141202	2014	12	2	2	36009	2	10	121.233	25.1333	0.35	4.8	7.93639	0.729167
'CT3004920'	3	20141202	2014	12	2	2	36009	2	10	121.25	25.1333	0.45	4.8	7.93639	0.9375
'CT3004917'	3	20141104	2014	11	4	2	36009	2	150	121.283	25.1667	0.45	9.05	16.4744	7.45856
'CT3004917'	3	20141104	2014	11	4	2	36009	2	150	121.283	25.15	0.15	9.05	16.4744	2.48619
'CT3004917'	3	20141104	2014	11	4	2	36009	2	150	121.017	25.0667	0.05	9.05	16.4744	0.828729
'CT3004917'	3	20141104	2014	11	4	2	36009	2	150	121.017	25.0833	0.5	9.05	16.4744	8.28729
'CT3004917'	3	20141104	2014	11	4	2	36009	2	150	121.033	25.0833	0.35	9.05	16.4744	5.8011
'CT3004917'	3	20141104	2014	11	4	2	36009	2	150	121.033	25.1	0.45	9.05	16.4744	7.45856
'CT3004917'	3	20141104	2014	11	4	2	36009	2	150	121.05	25.1	0.3	9.05	16.4744	4.97238
'CT3004917'	3	20141104	2014	11	4	2	36009	2	150	121.067	25.1	0.6	9.05	16.4744	9.94475
'CT3004917'	3	20141104	2014	11	4	2	36009	2	150	121.067	25.0833	0.35	9.05	16.4744	5.8011
'CT3004917'	3	20141104	2014	11	4	2	36009	2	150	121.067	25.0667	1.3	9.05	16.4744	21.547
'CT3004917'	3	20141104	2014	11	4	2	36009	2	150	121.05	25.0667	0.05	9.05	16.4744	0.828729
'CT3004917'	3	20141104	2014	11	4	2	36009	2	150	121.083	25.0833	0.15	9.05	16.4744	2.48619
'CT3004917'	3	20141104	2014	11	4	2	36009	2	150	121.1	25.0833	0.15	9.05	16.4744	2.48619
'CT3004917'	3	20141104	2014	11	4	2	36009	2	150	121.1	25.0667	0.3	9.05	16.4744	4.97238
'CT3004917'	3	20141104	2014	11	4	2	36009	2	150	121.117	25.0667	0.1	9.05	16.4744	1.65746
'CT3004917'	3	20141104	2014	11	4	2	36009	2	150	121.083	25.1	0.1	9.05	16.4744	1.65746
'CT3004917'	3	20141104	2014	11	4	2	36009	2	150	121.083	25.0667	0.6	9.05	16.4744	9.94475
'CT3004917'	3	20141104	2014	11	4	2	36009	2	150	121.067	25.05	0.65	9.05	16.4744	10.7735
'CT3004917'	3	20141104	2014	11	4	2	36009	2	150	121.05	25.05	0.7	9.05	16.4744	11.6022
'CT3004917'	3	20141104	2014	11	4	2	36009	2	150	121.033	25.05	0.35	9.05	16.4744	5.8011
'CT3004917'	3	20141104	2014	11	4	2	36009	2	150	121.017	25.05	0.55	9.05	16.4744	9.11602
'CT3004917'	3	20141104	2014	11	4	2	36009	2	150	121	25.05	0.75	9.05	16.4744	12.4309
'CT3004917'	3	20141104	2014	11	4	2	36009	2	150	121	25.0333	0.1	9.05	16.4744	1.65746
'CT3004917'	3	20141120	2014	11	20	2	36009	2	30	121	25.05	0.35	22.3	30.41	0.470852
'CT3004917'	3	20141120	2014	11	20	2	36009	2	30	121	25.0667	0.6	22.3	30.41	0.807175
'CT3004917'	3	20141120	2014	11	20	2	36009	2	30	121.017	25.0667	1.85	22.3	30.41	2.48879
'CT3004917'	3	20141120	2014	11	20	2	36009	2	30	121.017	25.0833	0.3	22.3	30.41	0.403587
'CT3004917'	3	20141120	2014	11	20	2	36009	2	30	121.05	25.0667	1.35	22.3	30.41	1.81614
'CT3004917'	3	20141120	2014	11	20	2	36009	2	30	121.067	25.0667	1.7	22.3	30.41	2.287
'CT3004917'	3	20141120	2014	11	20	2	36009	2	30	121.067	25.0833	2	22.3	30.41	2.69058
'CT3004917'	3	20141120	2014	11	20	2	36009	2	30	121.067	25.1	0.9	22.3	30.41	1.21076
'CT3004917'	3	20141120	2014	11	20	2	36009	2	30	121.083	25.1	0.3	22.3	30.41	0.403587
'CT3004917'	3	20141120	2014	11	20	2	36009	2	30	121.083	25.0833	2.5	22.3	30.41	3.36323
'CT3004917'	3	20141120	2014	11	20	2	36009	2	30	121.1	25.1	0.2	22.3	30.41	0.269058
'CT3004917'	3	20141120	2014	11	20	2	36009	2	30	121.1	25.0833	0.85	22.3	30.41	1.1435
'CT3004917'	3	20141120	2014	11	20	2	36009	2	30	121.05	25.05	0.7	22.3	30.41	0.941704
'CT3004917'	3	20141120	2014	11	20	2	36009	2	30	121.033	25.05	2.05	22.3	30.41	2.75785
'CT3004917'	3	20141120	2014	11	20	2	36009	2	30	121.017	25.05	0.9	22.3	30.41	1.21076
'CT3004917'	3	20141120	2014	11	20	2	36009	2	30	121.083	25.0667	0.05	22.3	30.41	0.0672646
'CT3004917'	3	20141120	2014	11	20	2	36009	2	30	121.117	25.0833	0.2	22.3	30.41	0.269058
'CT3004917'	3	20141120	2014	11	20	2	36009	2	30	121.117	25.1	0.5	22.3	30.41	0.672646
'CT3004917'	3	20141120	2014	11	20	2	36009	2	30	121.033	25.0667	0.3	22.3	30.41	0.403587
'CT3004917'	3	20141120	2014	11	20	2	36009	2	30	121.017	25.0333	0.8	22.3	30.41	1.07623
'CT3004917'	3	20141120	2014	11	20	2	36009	2	30	121.033	25.0333	0.1	22.3	30.41	0.134529
'CT3004917'	3	20141120	2014	11	20	2	36009	2	30	121	25.0333	1.2	22.3	30.41	1.61435
'CT3004917'	3	20141120	2014	11	20	2	36009	2	30	121	25.0167	0.85	22.3	30.41	1.1435
'CT3004917'	3	20141120	2014	11	20	2	36009	2	30	120.983	25.0167	1.75	22.3	30.41	2.35426
'CT3004917'	3	20141203	2014	12	3	2	36009	2	100	121.05	25.0833	0.85	18.1	25.1842	4.69613
'CT3004917'	3	20141203	2014	12	3	2	36009	2	100	121.033	25.0833	1.05	18.1	25.1842	5.8011
'CT3004917'	3	20141203	2014	12	3	2	36009	2	100	121.017	25.0833	2.25	18.1	25.1842	12.4309
'CT3004917'	3	20141203	2014	12	3	2	36009	2	100	121.017	25.0667	0.5	18.1	25.1842	2.76243
'CT3004917'	3	20141203	2014	12	3	2	36009	2	100	121	25.0667	2	18.1	25.1842	11.0497
'CT3004917'	3	20141203	2014	12	3	2	36009	2	100	121.033	25.05	0.05	18.1	25.1842	0.276243
'CT3004917'	3	20141203	2014	12	3	2	36009	2	100	121.017	25.05	0.2	18.1	25.1842	1.10497
'CT3004917'	3	20141203	2014	12	3	2	36009	2	100	121	25.05	0.6	18.1	25.1842	3.31492
'CT3004917'	3	20141203	2014	12	3	2	36009	2	100	120.983	25.05	0.05	18.1	25.1842	0.276243
'CT3004917'	3	20141203	2014	12	3	2	36009	2	100	120.983	25.0333	0.45	18.1	25.1842	2.48619
'CT3004917'	3	20141203	2014	12	3	2	36009	2	100	121	25.0333	0.1	18.1	25.1842	0.552486
'CT3004917'	3	20141203	2014	12	3	2	36009	2	100	121	25.0167	0.1	18.1	25.1842	0.552486
'CT3004917'	3	20141203	2014	12	3	2	36009	2	100	120.983	25.0167	0.55	18.1	25.1842	3.03867
'CT3004917'	3	20141203	2014	12	3	2	36009	2	100	120.967	25.0333	0.2	18.1	25.1842	1.10497
'CT3004917'	3	20141203	2014	12	3	2	36009	2	100	121	25.0833	0.05	18.1	25.1842	0.276243
'CT3004917'	3	20141203	2014	12	3	2	36009	2	100	121.033	25.1	1	18.1	25.1842	5.52486
'CT3004917'	3	20141203	2014	12	3	2	36009	2	100	121.05	25.1	0.25	18.1	25.1842	1.38122
'CT3004917'	3	20141203	2014	12	3	2	36009	2	100	121.05	25.1167	0.35	18.1	25.1842	1.9337
'CT3004917'	3	20141203	2014	12	3	2	36009	2	100	121.067	25.1167	0.5	18.1	25.1842	2.76243
'CT3004917'	3	20141203	2014	12	3	2	36009	2	100	121.067	25.1333	0.05	18.1	25.1842	0.276243
'CT3004917'	3	20141203	2014	12	3	2	36009	2	100	121.083	25.1333	0.1	18.1	25.1842	0.552486
'CT3004917'	3	20141203	2014	12	3	2	36009	2	100	121.1	25.1	0.2	18.1	25.1842	1.10497
'CT3004917'	3	20141203	2014	12	3	2	36009	2	100	121.1	25.1167	0.2	18.1	25.1842	1.10497
'CT3004917'	3	20141203	2014	12	3	2	36009	2	100	121.117	25.1167	0.5	18.1	25.1842	2.76243
'CT3004917'	3	20141203	2014	12	3	2	36009	2	100	121.133	25.1167	1.7	18.1	25.1842	9.39227
'CT3004917'	3	20141203	2014	12	3	2	36009	2	100	121.1	25.0833	1.05	18.1	25.1842	5.8011
'CT3004917'	3	20141203	2014	12	3	2	36009	2	100	121.117	25.0833	0.15	18.1	25.1842	0.828729
'CT3004917'	3	20141203	2014	12	3	2	36009	2	100	121.083	25.1	0.2	18.1	25.1842	1.10497
'CT3004917'	3	20141203	2014	12	3	2	36009	2	100	121.083	25.0667	0.95	18.1	25.1842	5.24862
'CT3004917'	3	20141203	2014	12	3	2	36009	2	100	121.067	25.0667	0.65	18.1	25.1842	3.59116
'CT3004917'	3	20141203	2014	12	3	2	36009	2	100	121.05	25.0667	1.25	18.1	25.1842	6.90608
'CT3004193'	3	20141022	2014	10	22	2	36009	2	32	122.5	25.4167	1.45	77.35	102.742	0.599871
'CT3004193'	3	20141022	2014	10	22	2	36009	2	32	122.5	25.4333	0.2	77.35	102.742	0.0827408
'CT3004193'	3	20141022	2014	10	22	2	36009	2	32	122.5	25.45	0.05	77.35	102.742	0.0206852
'CT3004193'	3	20141022	2014	10	22	2	36009	2	32	122.517	25.45	0.15	77.35	102.742	0.0620556
'CT3004193'	3	20141022	2014	10	22	2	36009	2	32	122.517	25.4667	0.1	77.35	102.742	0.0413704
'CT3004193'	3	20141022	2014	10	22	2	36009	2	32	122.517	25.4833	0.2	77.35	102.742	0.0827408
'CT3004193'	3	20141022	2014	10	22	2	36009	2	32	122.533	25.5	0.75	77.35	102.742	0.310278
'CT3004193'	3	20141022	2014	10	22	2	36009	2	32	122.517	25.5	0.1	77.35	102.742	0.0413704
'CT3004193'	3	20141022	2014	10	22	2	36009	2	32	122.533	25.5167	0.05	77.35	102.742	0.0206852
'CT3004193'	3	20141022	2014	10	22	2	36009	2	32	122.583	25.55	0.5	77.35	102.742	0.206852
'CT3004193'	3	20141022	2014	10	22	2	36009	2	32	122.55	25.5333	1.25	77.35	102.742	0.51713
'CT3004193'	3	20141022	2014	10	22	2	36009	2	32	122.533	25.5333	2.9	77.35	102.742	1.19974
'CT3004193'	3	20141022	2014	10	22	2	36009	2	32	122.567	25.5333	0.95	77.35	102.742	0.393019
'CT3004193'	3	20141022	2014	10	22	2	36009	2	32	122.567	25.55	0.3	77.35	102.742	0.124111
'CT3004193'	3	20141022	2014	10	22	2	36009	2	32	122.6	25.55	0.3	77.35	102.742	0.124111
'CT3004193'	3	20141022	2014	10	22	2	36009	2	32	122.617	25.55	0.25	77.35	102.742	0.103426
'CT3004193'	3	20141022	2014	10	22	2	36009	2	32	122.633	25.55	0.15	77.35	102.742	0.0620556
'CT3004193'	3	20141022	2014	10	22	2	36009	2	32	122.65	25.55	0.3	77.35	102.742	0.124111
'CT3004193'	3	20141022	2014	10	22	2	36009	2	32	122.667	25.5667	0.2	77.35	102.742	0.0827408
'CT3004193'	3	20141022	2014	10	22	2	36009	2	32	122.683	25.5667	0.3	77.35	102.742	0.124111
'CT3004193'	3	20141022	2014	10	22	2	36009	2	32	122.7	25.5667	0.2	77.35	102.742	0.0827408
'CT3004193'	3	20141022	2014	10	22	2	36009	2	32	122.717	25.5667	0.25	77.35	102.742	0.103426
'CT3004193'	3	20141022	2014	10	22	2	36009	2	32	122.733	25.5667	0.2	77.35	102.742	0.0827408
'CT3004193'	3	20141022	2014	10	22	2	36009	2	32	122.75	25.5667	0.25	77.35	102.742	0.103426
'CT3004193'	3	20141022	2014	10	22	2	36009	2	32	122.767	25.5667	0.3	77.35	102.742	0.124111
'CT3004193'	3	20141022	2014	10	22	2	36009	2	32	122.783	25.5667	0.1	77.35	102.742	0.0413704
'CT3004193'	3	20141022	2014	10	22	2	36009	2	32	122.783	25.5833	0.1	77.35	102.742	0.0413704
'CT3004193'	3	20141022	2014	10	22	2	36009	2	32	122.8	25.5833	0.25	77.35	102.742	0.103426
'CT3004193'	3	20141022	2014	10	22	2	36009	2	32	122.817	25.5833	0.2	77.35	102.742	0.0827408
'CT3004193'	3	20141022	2014	10	22	2	36009	2	32	122.833	25.5833	0.25	77.35	102.742	0.103426
'CT3004193'	3	20141022	2014	10	22	2	36009	2	32	122.85	25.5833	0.2	77.35	102.742	0.0827408
'CT3004193'	3	20141022	2014	10	22	2	36009	2	32	122.867	25.5833	0.2	77.35	102.742	0.0827408
'CT3004193'	3	20141022	2014	10	22	2	36009	2	32	122.883	25.6	0.25	77.35	102.742	0.103426
'CT3004193'	3	20141022	2014	10	22	2	36009	2	32	122.9	25.6	0.25	77.35	102.742	0.103426
'CT3004193'	3	20141022	2014	10	22	2	36009	2	32	122.917	25.6	0.2	77.35	102.742	0.0827408
'CT3004193'	3	20141022	2014	10	22	2	36009	2	32	122.933	25.6	0.2	77.35	102.742	0.0827408
'CT3004193'	3	20141022	2014	10	22	2	36009	2	32	122.95	25.6	0.15	77.35	102.742	0.0620556
'CT3004193'	3	20141022	2014	10	22	2	36009	2	32	122.95	25.6167	0.1	77.35	102.742	0.0413704
'CT3004193'	3	20141022	2014	10	22	2	36009	2	32	122.967	25.6167	0.25	77.35	102.742	0.103426
'CT3004193'	3	20141022	2014	10	22	2	36009	2	32	122.983	25.6167	1.1	77.35	102.742	0.455074
'CT3004193'	3	20141022	2014	10	22	2	36009	2	32	122.983	25.6333	0.8	77.35	102.742	0.330963
'CT3004193'	3	20141022	2014	10	22	2	36009	2	32	123	25.6167	0.1	77.35	102.742	0.0413704
'CT3004193'	3	20141022	2014	10	22	2	36009	2	32	123.017	25.6167	1.1	77.35	102.742	0.455074
'CT3004193'	3	20141022	2014	10	22	2	36009	2	32	123.033	25.5833	0.45	77.35	102.742	0.186167
'CT3004193'	3	20141022	2014	10	22	2	36009	2	32	123.033	25.6	1.1	77.35	102.742	0.455074
'CT3004193'	3	20141022	2014	10	22	2	36009	2	32	123.033	25.6167	1.75	77.35	102.742	0.723982
'CT3004193'	3	20141022	2014	10	22	2	36009	2	32	123.033	25.6333	1.15	77.35	102.742	0.47576
'CT3004193'	3	20141022	2014	10	22	2	36009	2	32	123.067	25.65	0.5	77.35	102.742	0.206852
'CT3004193'	3	20141022	2014	10	22	2	36009	2	32	123.133	25.65	6.2	77.35	102.742	2.56496
'CT3004193'	3	20141022	2014	10	22	2	36009	2	32	123.117	25.65	3.15	77.35	102.742	1.30317
'CT3004193'	3	20141022	2014	10	22	2	36009	2	32	123.15	25.6333	1.85	77.35	102.742	0.765352
'CT3004193'	3	20141022	2014	10	22	2	36009	2	32	123.15	25.65	8.55	77.35	102.742	3.53717
'CT3004193'	3	20141022	2014	10	22	2	36009	2	32	123.167	25.65	1.75	77.35	102.742	0.723982
'CT3004193'	3	20141022	2014	10	22	2	36009	2	32	123.15	25.6167	0.3	77.35	102.742	0.124111
'CT3004193'	3	20141022	2014	10	22	2	36009	2	32	123.167	25.6667	2.05	77.35	102.742	0.848093
'CT3004193'	3	20141022	2014	10	22	2	36009	2	32	123.1	25.65	3	77.35	102.742	1.24111
'CT3004193'	3	20141022	2014	10	22	2	36009	2	32	123.083	25.65	2.75	77.35	102.742	1.13769
'CT3004193'	3	20141022	2014	10	22	2	36009	2	32	123.083	25.6167	0.25	77.35	102.742	0.103426
'CT3004193'	3	20141022	2014	10	22	2	36009	2	32	123.083	25.6	0.2	77.35	102.742	0.0827408
'CT3004193'	3	20141022	2014	10	22	2	36009	2	32	123.067	25.6	1.15	77.35	102.742	0.47576
'CT3004193'	3	20141022	2014	10	22	2	36009	2	32	123.067	25.5833	1.75	77.35	102.742	0.723982
'CT3004193'	3	20141022	2014	10	22	2	36009	2	32	123.067	25.5667	0.85	77.35	102.742	0.351648
'CT3004193'	3	20141022	2014	10	22	2	36009	2	32	123.083	25.5833	0.2	77.35	102.742	0.0827408
'CT3004193'	3	20141022	2014	10	22	2	36009	2	32	123.1	25.5833	1.75	77.35	102.742	0.723982
'CT3004193'	3	20141022	2014	10	22	2	36009	2	32	123.1	25.6	0.85	77.35	102.742	0.351648
'CT3004193'	3	20141022	2014	10	22	2	36009	2	32	123.1	25.6167	0.95	77.35	102.742	0.393019
'CT3004193'	3	20141022	2014	10	22	2	36009	2	32	123.1	25.6333	0.9	77.35	102.742	0.372334
'CT3004193'	3	20141022	2014	10	22	2	36009	2	32	123.1	25.6667	0.2	77.35	102.742	0.0827408
'CT3004193'	3	20141022	2014	10	22	2	36009	2	32	123.167	25.6167	0.7	77.35	102.742	0.289593
'CT3004193'	3	20141022	2014	10	22	2	36009	2	32	123.167	25.6333	0.7	77.35	102.742	0.289593
'CT3004193'	3	20141022	2014	10	22	2	36009	2	32	123.167	25.6833	0.1	77.35	102.742	0.0413704
'CT3004193'	3	20141022	2014	10	22	2	36009	2	32	123.15	25.6667	1.3	77.35	102.742	0.537815
'CT3004193'	3	20141022	2014	10	22	2	36009	2	32	123	25.6333	1	77.35	102.742	0.413704
'CT3004193'	3	20141022	2014	10	22	2	36009	2	32	123.017	25.6333	0.65	77.35	102.742	0.268908
'CT3004193'	3	20141022	2014	10	22	2	36009	2	32	123.033	25.65	0.9	77.35	102.742	0.372334
'CT3004193'	3	20141022	2014	10	22	2	36009	2	32	123.05	25.6667	1.1	77.35	102.742	0.455074
'CT3004193'	3	20141022	2014	10	22	2	36009	2	32	123.067	25.6833	1	77.35	102.742	0.413704
'CT3004193'	3	20141022	2014	10	22	2	36009	2	32	123.05	25.6833	0.2	77.35	102.742	0.0827408
'CT3004193'	3	20141022	2014	10	22	2	36009	2	32	123.033	25.6667	0.35	77.35	102.742	0.144796
'CT3004193'	3	20141022	2014	10	22	2	36009	2	32	123.017	25.6667	1	77.35	102.742	0.413704
'CT3004193'	3	20141022	2014	10	22	2	36009	2	32	123.017	25.65	0.85	77.35	102.742	0.351648
'CT3004193'	3	20141022	2014	10	22	2	36009	2	32	123	25.65	1.4	77.35	102.742	0.579186
'CT3004193'	3	20141022	2014	10	22	2	36009	2	32	123	25.6667	0.5	77.35	102.742	0.206852
'CT3004193'	3	20141022	2014	10	22	2	36009	2	32	123.017	25.6833	2.1	77.35	102.742	0.868778
'CT3004193'	3	20141022	2014	10	22	2	36009	2	32	123.033	25.6833	1.6	77.35	102.742	0.661926
'CT3004193'	3	20141022	2014	10	22	2	36009	2	32	123.133	25.6333	0.8	77.35	102.742	0.330963
'CT3004193'	3	20141022	2014	10	22	2	36009	2	32	123.05	25.65	0.05	77.35	102.742	0.0206852
'CT3005728'	3	20141008	2014	10	8	2	36009	2	5	121.833	24.8333	1.85	3.4	4.67556	2.72059
'CT3005728'	3	20141008	2014	10	8	2	36009	2	5	121.85	24.8333	0.45	3.4	4.67556	0.661765
'CT3005728'	3	20141008	2014	10	8	2	36009	2	5	121.833	24.8167	1	3.4	4.67556	1.47059
'CT3005728'	3	20141008	2014	10	8	2	36009	2	5	121.833	24.85	0.1	3.4	4.67556	0.147059
'CT3005728'	3	20141016	2014	10	16	2	36009	2	3	121.85	24.85	2.2	7.45	9.94694	0.885906
'CT3005728'	3	20141016	2014	10	16	2	36009	2	3	121.833	24.8333	2.2	7.45	9.94694	0.885906
'CT3005728'	3	20141016	2014	10	16	2	36009	2	3	121.85	24.8333	1.55	7.45	9.94694	0.624161
'CT3005728'	3	20141016	2014	10	16	2	36009	2	3	121.85	24.8167	0.05	7.45	9.94694	0.0201342
'CT3005728'	3	20141016	2014	10	16	2	36009	2	3	121.833	24.8167	1.35	7.45	9.94694	0.543624
'CT3005728'	3	20141016	2014	10	16	2	36009	2	3	121.833	24.85	0.1	7.45	9.94694	0.0402685
'CT4002989'	4	20141024	2014	10	24	2	36009	2	150	121.517	25.3167	2.3	11.7	9.65	29.4872
'CT4002989'	4	20141024	2014	10	24	2	36009	2	150	121.517	25.3333	0.2	11.7	9.65	2.5641
'CT4002989'	4	20141024	2014	10	24	2	36009	2	150	121.5	25.3333	0.5	11.7	9.65	6.41026
'CT4002989'	4	20141024	2014	10	24	2	36009	2	150	121.45	25.3	0.5	11.7	9.65	6.41026
'CT4002989'	4	20141024	2014	10	24	2	36009	2	150	121.433	25.2833	0.9	11.7	9.65	11.5385
'CT4002989'	4	20141024	2014	10	24	2	36009	2	150	121.417	25.2833	0.8	11.7	9.65	10.2564
'CT4002989'	4	20141024	2014	10	24	2	36009	2	150	121.4	25.2833	0.3	11.7	9.65	3.84615
'CT4002989'	4	20141024	2014	10	24	2	36009	2	150	121.4	25.2667	0.9	11.7	9.65	11.5385
'CT4002989'	4	20141024	2014	10	24	2	36009	2	150	121.383	25.2667	1.1	11.7	9.65	14.1026
'CT4002989'	4	20141024	2014	10	24	2	36009	2	150	121.367	25.2667	1.3	11.7	9.65	16.6667
'CT4002989'	4	20141024	2014	10	24	2	36009	2	150	121.35	25.2833	2.8	11.7	9.65	35.8974
'CT4002989'	4	20141024	2014	10	24	2	36009	2	150	121.35	25.25	0.1	11.7	9.65	1.28205
'CT4002989'	4	20141028	2014	10	28	2	36009	2	100	121.467	25.3	2.1	8	6.75	26.25
'CT4002989'	4	20141028	2014	10	28	2	36009	2	100	121.467	25.3167	0.2	8	6.75	2.5
'CT4002989'	4	20141028	2014	10	28	2	36009	2	100	121.483	25.3	0.9	8	6.75	11.25
'CT4002989'	4	20141028	2014	10	28	2	36009	2	100	121.45	25.3	0.9	8	6.75	11.25
'CT4002989'	4	20141028	2014	10	28	2	36009	2	100	121.45	25.3167	0.4	8	6.75	5
'CT4002989'	4	20141028	2014	10	28	2	36009	2	100	121.433	25.3167	0.1	8	6.75	1.25
'CT4002989'	4	20141028	2014	10	28	2	36009	2	100	121.417	25.2833	1.2	8	6.75	15
'CT4002989'	4	20141028	2014	10	28	2	36009	2	100	121.4	25.2833	0.4	8	6.75	5
'CT4002989'	4	20141028	2014	10	28	2	36009	2	100	121.4	25.3	0.4	8	6.75	5
'CT4002989'	4	20141028	2014	10	28	2	36009	2	100	121.383	25.3	1.1	8	6.75	13.75
'CT4002989'	4	20141028	2014	10	28	2	36009	2	100	121.367	25.3	0.2	8	6.75	2.5
'CT4002989'	4	20141028	2014	10	28	2	36009	2	100	121.367	25.2667	0.1	8	6.75	1.25
'CT4002989'	4	20141104	2014	11	4	2	36009	2	100	121.433	25.25	0.7	12.9	9.95	5.42636
'CT4002989'	4	20141104	2014	11	4	2	36009	2	100	121.45	25.2667	0.4	12.9	9.95	3.10078
'CT4002989'	4	20141104	2014	11	4	2	36009	2	100	121.483	25.2833	0.7	12.9	9.95	5.42636
'CT4002989'	4	20141104	2014	11	4	2	36009	2	100	121.5	25.3	3.7	12.9	9.95	28.6822
'CT4002989'	4	20141104	2014	11	4	2	36009	2	100	121.517	25.3	0.1	12.9	9.95	0.775194
'CT4002989'	4	20141104	2014	11	4	2	36009	2	100	121.467	25.2833	0.6	12.9	9.95	4.65116
'CT4002989'	4	20141104	2014	11	4	2	36009	2	100	121.45	25.2833	1.3	12.9	9.95	10.0775
'CT4002989'	4	20141104	2014	11	4	2	36009	2	100	121.433	25.2833	2	12.9	9.95	15.5039
'CT4002989'	4	20141104	2014	11	4	2	36009	2	100	121.417	25.2833	2.1	12.9	9.95	16.2791
'CT4002989'	4	20141104	2014	11	4	2	36009	2	100	121.4	25.2833	0.3	12.9	9.95	2.32558
'CT4002989'	4	20141104	2014	11	4	2	36009	2	100	121.383	25.2667	0.1	12.9	9.95	0.775194
'CT4002989'	4	20141104	2014	11	4	2	36009	2	100	121.4	25.2667	0.9	12.9	9.95	6.97674
'CT4002989'	4	20141111	2014	11	11	2	36009	2	100	121.133	25.1	1.1	45.8	34.15	2.40175
'CT4002989'	4	20141111	2014	11	11	2	36009	2	100	121.117	25.1	1.2	45.8	34.15	2.62009
'CT4002989'	4	20141111	2014	11	11	2	36009	2	100	121.117	25.1167	0.5	45.8	34.15	1.0917
'CT4002989'	4	20141111	2014	11	11	2	36009	2	100	121.117	25.1333	2.6	45.8	34.15	5.67686
'CT4002989'	4	20141111	2014	11	11	2	36009	2	100	121.1	25.1333	1.4	45.8	34.15	3.05677
'CT4002989'	4	20141111	2014	11	11	2	36009	2	100	121.15	25.1	0.1	45.8	34.15	0.218341
'CT4002989'	4	20141111	2014	11	11	2	36009	2	100	121.15	25.1167	3	45.8	34.15	6.55022
'CT4002989'	4	20141111	2014	11	11	2	36009	2	100	121.15	25.1333	3.7	45.8	34.15	8.0786
'CT4002989'	4	20141111	2014	11	11	2	36009	2	100	121.133	25.1333	2.5	45.8	34.15	5.45852
'CT4002989'	4	20141111	2014	11	11	2	36009	2	100	121.067	25.1	2.4	45.8	34.15	5.24017
'CT4002989'	4	20141111	2014	11	11	2	36009	2	100	121.05	25.1	2.4	45.8	34.15	5.24017
'CT4002989'	4	20141111	2014	11	11	2	36009	2	100	121.033	25.1	1.7	45.8	34.15	3.71179
'CT4002989'	4	20141111	2014	11	11	2	36009	2	100	121.017	25.1	2.1	45.8	34.15	4.58515
'CT4002989'	4	20141111	2014	11	11	2	36009	2	100	121.017	25.1167	2	45.8	34.15	4.36681
'CT4002989'	4	20141111	2014	11	11	2	36009	2	100	121.1	25.1167	1.2	45.8	34.15	2.62009
'CT4002989'	4	20141111	2014	11	11	2	36009	2	100	121.117	25.15	2.4	45.8	34.15	5.24017
'CT4002989'	4	20141111	2014	11	11	2	36009	2	100	121.117	25.1667	0.4	45.8	34.15	0.873362
'CT4002989'	4	20141111	2014	11	11	2	36009	2	100	121.133	25.1667	1.1	45.8	34.15	2.40175
'CT4002989'	4	20141111	2014	11	11	2	36009	2	100	121.15	25.15	0.1	45.8	34.15	0.218341
'CT4002989'	4	20141111	2014	11	11	2	36009	2	100	121.167	25.1333	0.8	45.8	34.15	1.74672
'CT4002989'	4	20141111	2014	11	11	2	36009	2	100	121.1	25.1	2	45.8	34.15	4.36681
'CT4002989'	4	20141111	2014	11	11	2	36009	2	100	121.083	25.1	1	45.8	34.15	2.18341
'CT4002989'	4	20141111	2014	11	11	2	36009	2	100	121.067	25.0833	0.1	45.8	34.15	0.218341
'CT4002989'	4	20141111	2014	11	11	2	36009	2	100	121.05	25.0833	1	45.8	34.15	2.18341
'CT4002989'	4	20141111	2014	11	11	2	36009	2	100	121.033	25.0833	1	45.8	34.15	2.18341
'CT4002989'	4	20141111	2014	11	11	2	36009	2	100	121.033	25.0667	0.6	45.8	34.15	1.31004
'CT4002989'	4	20141111	2014	11	11	2	36009	2	100	121.017	25.0667	0.2	45.8	34.15	0.436681
'CT4002989'	4	20141111	2014	11	11	2	36009	2	100	121.083	25.0833	0.1	45.8	34.15	0.218341
'CT4002989'	4	20141111	2014	11	11	2	36009	2	100	121.1	25.0833	3.5	45.8	34.15	7.64192
'CT4002989'	4	20141111	2014	11	11	2	36009	2	100	121.117	25.0833	0.8	45.8	34.15	1.74672
'CT4002989'	4	20141111	2014	11	11	2	36009	2	100	121.083	25.1333	0.8	45.8	34.15	1.74672
'CT4002989'	4	20141111	2014	11	11	2	36009	2	100	121.133	25.1167	1.6	45.8	34.15	3.49345
'CT4002989'	4	20141111	2014	11	11	2	36009	2	100	121.1	25.15	0.4	45.8	34.15	0.873362
'CT4002989'	4	20141120	2014	11	20	2	36009	2	40	121.2	25.1333	0.1	46.5	31.55	0.0860215
'CT4002989'	4	20141120	2014	11	20	2	36009	2	40	121.083	25.1	3.5	46.5	31.55	3.01075
'CT4002989'	4	20141120	2014	11	20	2	36009	2	40	121.083	25.1167	1.3	46.5	31.55	1.11828
'CT4002989'	4	20141120	2014	11	20	2	36009	2	40	121.1	25.1333	1.4	46.5	31.55	1.2043
'CT4002989'	4	20141120	2014	11	20	2	36009	2	40	121.117	25.1333	1.3	46.5	31.55	1.11828
'CT4002989'	4	20141120	2014	11	20	2	36009	2	40	121.15	25.1333	0.9	46.5	31.55	0.774194
'CT4002989'	4	20141120	2014	11	20	2	36009	2	40	121.15	25.15	2.4	46.5	31.55	2.06452
'CT4002989'	4	20141120	2014	11	20	2	36009	2	40	121.133	25.1167	3.7	46.5	31.55	3.1828
'CT4002989'	4	20141120	2014	11	20	2	36009	2	40	121.133	25.1	1.6	46.5	31.55	1.37634
'CT4002989'	4	20141120	2014	11	20	2	36009	2	40	121.117	25.1	3.2	46.5	31.55	2.75269
'CT4002989'	4	20141120	2014	11	20	2	36009	2	40	121.1	25.1	2.3	46.5	31.55	1.97849
'CT4002989'	4	20141120	2014	11	20	2	36009	2	40	121.1	25.0833	2.7	46.5	31.55	2.32258
'CT4002989'	4	20141120	2014	11	20	2	36009	2	40	121.117	25.0833	0.7	46.5	31.55	0.602151
'CT4002989'	4	20141120	2014	11	20	2	36009	2	40	121.1	25.1167	0.5	46.5	31.55	0.430108
'CT4002989'	4	20141120	2014	11	20	2	36009	2	40	121.083	25.0833	2	46.5	31.55	1.72043
'CT4002989'	4	20141120	2014	11	20	2	36009	2	40	121.067	25.0833	0.3	46.5	31.55	0.258065
'CT4002989'	4	20141120	2014	11	20	2	36009	2	40	121.067	25.0667	2	46.5	31.55	1.72043
'CT4002989'	4	20141120	2014	11	20	2	36009	2	40	121.05	25.0833	2.1	46.5	31.55	1.80645
'CT4002989'	4	20141120	2014	11	20	2	36009	2	40	121.05	25.0667	0.2	46.5	31.55	0.172043
'CT4002989'	4	20141120	2014	11	20	2	36009	2	40	121.067	25.1	2.1	46.5	31.55	1.80645
'CT4002989'	4	20141120	2014	11	20	2	36009	2	40	121.117	25.1167	2.2	46.5	31.55	1.89247
'CT4002989'	4	20141120	2014	11	20	2	36009	2	40	121.15	25.1167	3.2	46.5	31.55	2.75269
'CT4002989'	4	20141120	2014	11	20	2	36009	2	40	121.15	25.1	0.4	46.5	31.55	0.344086
'CT4002989'	4	20141120	2014	11	20	2	36009	2	40	121.133	25.15	0.2	46.5	31.55	0.172043
'CT4002989'	4	20141120	2014	11	20	2	36009	2	40	121.133	25.1333	0.3	46.5	31.55	0.258065
'CT4002989'	4	20141120	2014	11	20	2	36009	2	40	121.067	25.1167	1.5	46.5	31.55	1.29032
'CT4002989'	4	20141120	2014	11	20	2	36009	2	40	121.05	25.1	4.4	46.5	31.55	3.78495
'CT4002989'	4	20141121	2014	11	21	2	36009	2	30	121.4	25.1833	1.5	16.5	15.75	2.72727
'CT4002989'	4	20141121	2014	11	21	2	36009	2	30	121.4	25.2	0.4	16.5	15.75	0.727273
'CT4002989'	4	20141121	2014	11	21	2	36009	2	30	121.15	25.1	2.8	16.5	15.75	5.09091
'CT4002989'	4	20141121	2014	11	21	2	36009	2	30	121.15	25.0833	0.1	16.5	15.75	0.181818
'CT4002989'	4	20141121	2014	11	21	2	36009	2	30	121.133	25.0833	1	16.5	15.75	1.81818
'CT4002989'	4	20141121	2014	11	21	2	36009	2	30	121.117	25.1	0.1	16.5	15.75	0.181818
'CT4002989'	4	20141121	2014	11	21	2	36009	2	30	121.117	25.1167	0.1	16.5	15.75	0.181818
'CT4002989'	4	20141121	2014	11	21	2	36009	2	30	121.117	25.1333	1.1	16.5	15.75	2
'CT4002989'	4	20141121	2014	11	21	2	36009	2	30	121.1	25.1333	0.1	16.5	15.75	0.181818
'CT4002989'	4	20141121	2014	11	21	2	36009	2	30	121.1	25.1167	1.2	16.5	15.75	2.18182
'CT4002989'	4	20141121	2014	11	21	2	36009	2	30	121.083	25.0833	0.1	16.5	15.75	0.181818
'CT4002989'	4	20141121	2014	11	21	2	36009	2	30	121.067	25.0667	1.9	16.5	15.75	3.45455
'CT4002989'	4	20141121	2014	11	21	2	36009	2	30	121.05	25.0667	2.7	16.5	15.75	4.90909
'CT4002989'	4	20141121	2014	11	21	2	36009	2	30	121.033	25.0667	1.6	16.5	15.75	2.90909
'CT4002989'	4	20141121	2014	11	21	2	36009	2	30	121.033	25.0833	0.8	16.5	15.75	1.45455
'CT4002989'	4	20141121	2014	11	21	2	36009	2	30	121.05	25.0833	0.7	16.5	15.75	1.27273
'CT4002989'	4	20141121	2014	11	21	2	36009	2	30	121.067	25.1	0.3	16.5	15.75	0.545455
'CT4002989'	4	20141128	2014	11	28	2	36009	2	30	121.017	25.05	0.45	11.25	19.3	1.2
'CT4002989'	4	20141128	2014	11	28	2	36009	2	30	121.017	25.0333	0.15	11.25	19.3	0.4
'CT4002989'	4	20141128	2014	11	28	2	36009	2	30	121	25.0667	0.3	11.25	19.3	0.8
'CT4002989'	4	20141128	2014	11	28	2	36009	2	30	121	25.0833	0.05	11.25	19.3	0.133333
'CT4002989'	4	20141128	2014	11	28	2	36009	2	30	121.033	25.0667	0.7	11.25	19.3	1.86667
'CT4002989'	4	20141128	2014	11	28	2	36009	2	30	121.05	25.0667	0.2	11.25	19.3	0.533333
'CT4002989'	4	20141128	2014	11	28	2	36009	2	30	121.05	25.0833	1.05	11.25	19.3	2.8
'CT4002989'	4	20141128	2014	11	28	2	36009	2	30	121.05	25.1	1	11.25	19.3	2.66667
'CT4002989'	4	20141128	2014	11	28	2	36009	2	30	121.05	25.1167	0.35	11.25	19.3	0.933333
'CT4002989'	4	20141128	2014	11	28	2	36009	2	30	121.033	25.1167	0.65	11.25	19.3	1.73333
'CT4002989'	4	20141128	2014	11	28	2	36009	2	30	121.033	25.1	0.05	11.25	19.3	0.133333
'CT4002989'	4	20141128	2014	11	28	2	36009	2	30	121.017	25.1167	0.55	11.25	19.3	1.46667
'CT4002989'	4	20141128	2014	11	28	2	36009	2	30	121	25.1167	0.05	11.25	19.3	0.133333
'CT4002989'	4	20141128	2014	11	28	2	36009	2	30	121	25.1	0.3	11.25	19.3	0.8
'CT4002989'	4	20141128	2014	11	28	2	36009	2	30	121.017	25.0833	0.1	11.25	19.3	0.266667
'CT4002989'	4	20141128	2014	11	28	2	36009	2	30	121	25.0333	0.45	11.25	19.3	1.2
'CT4002989'	4	20141128	2014	11	28	2	36009	2	30	120.983	25.0333	1.2	11.25	19.3	3.2
'CT4002989'	4	20141128	2014	11	28	2	36009	2	30	120.983	25.0167	0.55	11.25	19.3	1.46667
'CT4002989'	4	20141128	2014	11	28	2	36009	2	30	120.983	25.05	1.3	11.25	19.3	3.46667
'CT4002989'	4	20141128	2014	11	28	2	36009	2	30	120.967	25.0333	0.15	11.25	19.3	0.4
'CT4002989'	4	20141128	2014	11	28	2	36009	2	30	120.967	25.05	0.35	11.25	19.3	0.933333
'CT4002989'	4	20141128	2014	11	28	2	36009	2	30	120.983	25.0667	0.4	11.25	19.3	1.06667
'CT4002989'	4	20141128	2014	11	28	2	36009	2	30	121	25.05	0.1	11.25	19.3	0.266667
'CT4002989'	4	20141128	2014	11	28	2	36009	2	30	121.017	25.0667	0.15	11.25	19.3	0.4
'CT4002989'	4	20141128	2014	11	28	2	36009	2	30	121.033	25.0833	0.1	11.25	19.3	0.266667
'CT4002989'	4	20141128	2014	11	28	2	36009	2	30	121.067	25.1	0.1	11.25	19.3	0.266667
'CT4002989'	4	20141128	2014	11	28	2	36009	2	30	121.067	25.1167	0.45	11.25	19.3	1.2
'CT4002989'	4	20141203	2014	12	3	2	36009	2	60	121.133	25.1	0.55	17.8	24.9	1.85393
'CT4002989'	4	20141203	2014	12	3	2	36009	2	60	121.1	25.1	0.1	17.8	24.9	0.337079
'CT4002989'	4	20141203	2014	12	3	2	36009	2	60	121.083	25.1333	0.55	17.8	24.9	1.85393
'CT4002989'	4	20141203	2014	12	3	2	36009	2	60	121.067	25.1167	0.5	17.8	24.9	1.68539
'CT4002989'	4	20141203	2014	12	3	2	36009	2	60	121.083	25.1	0.85	17.8	24.9	2.86517
'CT4002989'	4	20141203	2014	12	3	2	36009	2	60	121.067	25.1	1.65	17.8	24.9	5.5618
'CT4002989'	4	20141203	2014	12	3	2	36009	2	60	121.05	25.1	0.45	17.8	24.9	1.51685
'CT4002989'	4	20141203	2014	12	3	2	36009	2	60	121.05	25.1167	0.7	17.8	24.9	2.35955
'CT4002989'	4	20141203	2014	12	3	2	36009	2	60	121.033	25.1	0.45	17.8	24.9	1.51685
'CT4002989'	4	20141203	2014	12	3	2	36009	2	60	121.033	25.0833	0.2	17.8	24.9	0.674157
'CT4002989'	4	20141203	2014	12	3	2	36009	2	60	121.017	25.0833	0.45	17.8	24.9	1.51685
'CT4002989'	4	20141203	2014	12	3	2	36009	2	60	121.017	25.1	0.65	17.8	24.9	2.19101
'CT4002989'	4	20141203	2014	12	3	2	36009	2	60	121	25.0833	2.8	17.8	24.9	9.4382
'CT4002989'	4	20141203	2014	12	3	2	36009	2	60	121	25.1	0.2	17.8	24.9	0.674157
'CT4002989'	4	20141203	2014	12	3	2	36009	2	60	121.033	25.1167	0.65	17.8	24.9	2.19101
'CT4002989'	4	20141203	2014	12	3	2	36009	2	60	121.033	25.1333	0.05	17.8	24.9	0.168539
'CT4002989'	4	20141203	2014	12	3	2	36009	2	60	121.05	25.1333	0.65	17.8	24.9	2.19101
'CT4002989'	4	20141203	2014	12	3	2	36009	2	60	121.067	25.1333	0.3	17.8	24.9	1.01124
'CT4002989'	4	20141203	2014	12	3	2	36009	2	60	121.067	25.15	0.3	17.8	24.9	1.01124
'CT4002989'	4	20141203	2014	12	3	2	36009	2	60	121.083	25.15	0.4	17.8	24.9	1.34831
'CT4002989'	4	20141203	2014	12	3	2	36009	2	60	121.1	25.15	0.6	17.8	24.9	2.02247
'CT4002989'	4	20141203	2014	12	3	2	36009	2	60	121.117	25.15	1	17.8	24.9	3.37079
'CT4002989'	4	20141203	2014	12	3	2	36009	2	60	121.117	25.1667	0.65	17.8	24.9	2.19101
'CT4002989'	4	20141203	2014	12	3	2	36009	2	60	121.133	25.15	0.2	17.8	24.9	0.674157
'CT4002989'	4	20141203	2014	12	3	2	36009	2	60	121.133	25.1167	0.25	17.8	24.9	0.842697
'CT4002989'	4	20141203	2014	12	3	2	36009	2	60	121.133	25.0833	0.15	17.8	24.9	0.505618
'CT4002989'	4	20141203	2014	12	3	2	36009	2	60	121.117	25.1	0.05	17.8	24.9	0.168539
'CT4002989'	4	20141203	2014	12	3	2	36009	2	60	121.1	25.1167	0.35	17.8	24.9	1.17978
'CT4002989'	4	20141203	2014	12	3	2	36009	2	60	121.1	25.1333	0.05	17.8	24.9	0.168539
'CT4002989'	4	20141203	2014	12	3	2	36009	2	60	121.083	25.0833	0.5	17.8	24.9	1.68539
'CT4002989'	4	20141203	2014	12	3	2	36009	2	60	121.067	25.0833	0.65	17.8	24.9	2.19101
'CT4002989'	4	20141203	2014	12	3	2	36009	2	60	121.05	25.0833	0.4	17.8	24.9	1.34831
'CT4002989'	4	20141203	2014	12	3	2	36009	2	60	121.083	25.1167	0.5	17.8	24.9	1.68539
'CT3004862'	3	20141016	2014	10	16	2	36009	2	400	121.033	25.0833	0.45	13.55	21.3	13.2841
'CT3004862'	3	20141016	2014	10	16	2	36009	2	400	121.033	25.0667	2.7	13.55	21.3	79.7048
'CT3004862'	3	20141016	2014	10	16	2	36009	2	400	121.05	25.0667	3	13.55	21.3	88.5609
'CT3004862'	3	20141016	2014	10	16	2	36009	2	400	121.05	25.0833	1.75	13.55	21.3	51.6605
'CT3004862'	3	20141016	2014	10	16	2	36009	2	400	121.033	25.05	1.65	13.55	21.3	48.7085
'CT3004862'	3	20141016	2014	10	16	2	36009	2	400	121.017	25.0667	0.75	13.55	21.3	22.1402
'CT3004862'	3	20141016	2014	10	16	2	36009	2	400	121.017	25.05	0.95	13.55	21.3	28.0443
'CT3004862'	3	20141016	2014	10	16	2	36009	2	400	121.017	25.0333	0.4	13.55	21.3	11.8081
'CT3004862'	3	20141016	2014	10	16	2	36009	2	400	121	25.0333	0.35	13.55	21.3	10.3321
'CT3004862'	3	20141016	2014	10	16	2	36009	2	400	121	25.05	0.75	13.55	21.3	22.1402
'CT3004862'	3	20141016	2014	10	16	2	36009	2	400	120.983	25.05	0.1	13.55	21.3	2.95203
'CT3004862'	3	20141016	2014	10	16	2	36009	2	400	121.067	25.0833	0.25	13.55	21.3	7.38007
'CT3004862'	3	20141016	2014	10	16	2	36009	2	400	121.067	25.1	0.4	13.55	21.3	11.8081
'CT3004862'	3	20141016	2014	10	16	2	36009	2	400	121.383	25.1667	0.05	13.55	21.3	1.47601
'CT3004862'	3	20141020	2014	10	20	2	36009	2	200	121.217	25.1167	0.15	9.65	14.4	3.10881
'CT3004862'	3	20141020	2014	10	20	2	36009	2	200	121.167	25.1	1	9.65	14.4	20.7254
'CT3004862'	3	20141020	2014	10	20	2	36009	2	200	121.15	25.1	1.05	9.65	14.4	21.7617
'CT3004862'	3	20141020	2014	10	20	2	36009	2	200	121.133	25.1	0.3	9.65	14.4	6.21762
'CT3004862'	3	20141020	2014	10	20	2	36009	2	200	121.133	25.0833	0.5	9.65	14.4	10.3627
'CT3004862'	3	20141020	2014	10	20	2	36009	2	200	121.117	25.1	0.45	9.65	14.4	9.32642
'CT3004862'	3	20141020	2014	10	20	2	36009	2	200	121.1	25.1	0.5	9.65	14.4	10.3627
'CT3004862'	3	20141020	2014	10	20	2	36009	2	200	121.1	25.0833	0.9	9.65	14.4	18.6528
'CT3004862'	3	20141020	2014	10	20	2	36009	2	200	121.083	25.0833	0.75	9.65	14.4	15.544
'CT3004862'	3	20141020	2014	10	20	2	36009	2	200	121.067	25.0833	0.2	9.65	14.4	4.14508
'CT3004862'	3	20141020	2014	10	20	2	36009	2	200	121.067	25.0667	0.9	9.65	14.4	18.6528
'CT3004862'	3	20141020	2014	10	20	2	36009	2	200	121.05	25.0667	0.35	9.65	14.4	7.25389
'CT3004862'	3	20141020	2014	10	20	2	36009	2	200	121.05	25.05	1.65	9.65	14.4	34.1969
'CT3004862'	3	20141020	2014	10	20	2	36009	2	200	121.083	25.0667	0.6	9.65	14.4	12.4352
'CT3004862'	3	20141020	2014	10	20	2	36009	2	200	121.117	25.0833	0.35	9.65	14.4	7.25389
'CT3004862'	3	20141021	2014	10	21	2	36009	2	180	121.183	25.1167	0.25	7.4	11.95	6.08108
'CT3004862'	3	20141021	2014	10	21	2	36009	2	180	121.167	25.1167	0.05	7.4	11.95	1.21622
'CT3004862'	3	20141021	2014	10	21	2	36009	2	180	121.167	25.1	0.2	7.4	11.95	4.86486
'CT3004862'	3	20141021	2014	10	21	2	36009	2	180	121.15	25.1	0.1	7.4	11.95	2.43243
'CT3004862'	3	20141021	2014	10	21	2	36009	2	180	121.133	25.1	0.05	7.4	11.95	1.21622
'CT3004862'	3	20141021	2014	10	21	2	36009	2	180	121.117	25.1167	0.7	7.4	11.95	17.027
'CT3004862'	3	20141021	2014	10	21	2	36009	2	180	121.117	25.1	0.3	7.4	11.95	7.2973
'CT3004862'	3	20141021	2014	10	21	2	36009	2	180	121.1	25.1	0.75	7.4	11.95	18.2432
'CT3004862'	3	20141021	2014	10	21	2	36009	2	180	121.1	25.1167	0.25	7.4	11.95	6.08108
'CT3004862'	3	20141021	2014	10	21	2	36009	2	180	121.083	25.1	0.3	7.4	11.95	7.2973
'CT3004862'	3	20141021	2014	10	21	2	36009	2	180	121.083	25.0833	0.7	7.4	11.95	17.027
'CT3004862'	3	20141021	2014	10	21	2	36009	2	180	121.067	25.0833	0.2	7.4	11.95	4.86486
'CT3004862'	3	20141021	2014	10	21	2	36009	2	180	121.067	25.0667	2.15	7.4	11.95	52.2973
'CT3004862'	3	20141021	2014	10	21	2	36009	2	180	121.083	25.0667	0.4	7.4	11.95	9.72973
'CT3004862'	3	20141021	2014	10	21	2	36009	2	180	121.1	25.0833	0.45	7.4	11.95	10.9459
'CT3004862'	3	20141021	2014	10	21	2	36009	2	180	121.117	25.0833	0.45	7.4	11.95	10.9459
'CT3004862'	3	20141021	2014	10	21	2	36009	2	180	121.133	25.0833	0.1	7.4	11.95	2.43243
'CT3004021'	3	20141110	2014	11	10	2	36009	2	200	121.267	25.15	0.5	4.05	6.7	24.6914
'CT3004021'	3	20141110	2014	11	10	2	36009	2	200	121.25	25.1667	0.25	4.05	6.7	12.3457
'CT3004021'	3	20141110	2014	11	10	2	36009	2	200	121.267	25.1667	0.45	4.05	6.7	22.2222
'CT3004021'	3	20141110	2014	11	10	2	36009	2	200	121.283	25.1667	1.3	4.05	6.7	64.1975
'CT3004021'	3	20141110	2014	11	10	2	36009	2	200	121.283	25.15	1.55	4.05	6.7	76.5432
'CT3004021'	3	20141119	2014	11	19	2	36009	2	40	121.267	25.1667	0.05	6.35	11.75	0.314961
'CT3004021'	3	20141119	2014	11	19	2	36009	2	40	121.2	25.1333	0.05	6.35	11.75	0.314961
'CT3004021'	3	20141119	2014	11	19	2	36009	2	40	121.2	25.15	0.05	6.35	11.75	0.314961
'CT3004021'	3	20141119	2014	11	19	2	36009	2	40	121.217	25.1333	0.4	6.35	11.75	2.51969
'CT3004021'	3	20141119	2014	11	19	2	36009	2	40	121.217	25.15	0.25	6.35	11.75	1.5748
'CT3004021'	3	20141119	2014	11	19	2	36009	2	40	121.233	25.15	1	6.35	11.75	6.29921
'CT3004021'	3	20141119	2014	11	19	2	36009	2	40	121.233	25.1667	0.3	6.35	11.75	1.88976
'CT3004021'	3	20141119	2014	11	19	2	36009	2	40	121.133	25.1	1.15	6.35	11.75	7.24409
'CT3004021'	3	20141119	2014	11	19	2	36009	2	40	121.117	25.1	0.6	6.35	11.75	3.77953
'CT3004021'	3	20141119	2014	11	19	2	36009	2	40	121.117	25.0833	0.15	6.35	11.75	0.944882
'CT3004021'	3	20141119	2014	11	19	2	36009	2	40	121.1	25.0833	0.8	6.35	11.75	5.03937
'CT3004021'	3	20141119	2014	11	19	2	36009	2	40	121.083	25.0833	1	6.35	11.75	6.29921
'CT3004021'	3	20141119	2014	11	19	2	36009	2	40	121.067	25.0833	0.55	6.35	11.75	3.46457
'CT2005839'	2	20141110	2014	11	10	2	36009	2	300	121.05	25.05	0.9	3.4	10.1122	79.4118
'CT2005839'	2	20141110	2014	11	10	2	36009	2	300	121.033	25.0667	0.75	3.4	10.1122	66.1765
'CT2005839'	2	20141110	2014	11	10	2	36009	2	300	121.05	25.0667	1.7	3.4	10.1122	150
'CT2005839'	2	20141111	2014	11	11	2	36009	2	100	121.233	25.15	1	5.15	9.66694	19.4175
'CT2005839'	2	20141111	2014	11	11	2	36009	2	100	121.233	25.1667	0.3	5.15	9.66694	5.82524
'CT2005839'	2	20141111	2014	11	11	2	36009	2	100	121.2	25.15	0.05	5.15	9.66694	0.970874
'CT2005839'	2	20141111	2014	11	11	2	36009	2	100	121.217	25.15	0.7	5.15	9.66694	13.5922
'CT2005839'	2	20141111	2014	11	11	2	36009	2	100	121.217	25.1667	0.05	5.15	9.66694	0.970874
'CT2005839'	2	20141111	2014	11	11	2	36009	2	100	121.25	25.1667	1.1	5.15	9.66694	21.3592
'CT2005839'	2	20141111	2014	11	11	2	36009	2	100	121.25	25.1333	0.45	5.15	9.66694	8.73786
'CT2005839'	2	20141111	2014	11	11	2	36009	2	100	121.25	25.15	0.7	5.15	9.66694	13.5922
'CT2005839'	2	20141111	2014	11	11	2	36009	2	100	121.267	25.1667	0.8	5.15	9.66694	15.534
'CT3004795'	3	20141121	2014	11	21	2	36009	2	20	121.4	25.1833	0.6	1.05	1.54889	11.4286
'CT3004795'	3	20141121	2014	11	21	2	36009	2	20	121.4	25.2	0.45	1.05	1.54889	8.57143
'CT2005584'	2	20141104	2014	11	4	2	36009	2	200	121.267	25.1333	0.15	11.55	16.8361	2.5974
'CT2005584'	2	20141104	2014	11	4	2	36009	2	200	121.267	25.15	0.35	11.55	16.8361	6.06061
'CT2005584'	2	20141104	2014	11	4	2	36009	2	200	121.25	25.15	0.85	11.55	16.8361	14.7186
'CT2005584'	2	20141104	2014	11	4	2	36009	2	200	121.233	25.15	1.45	11.55	16.8361	25.1082
'CT2005584'	2	20141104	2014	11	4	2	36009	2	200	121.217	25.15	1.5	11.55	16.8361	25.974
'CT2005584'	2	20141104	2014	11	4	2	36009	2	200	121.217	25.1333	0.05	11.55	16.8361	0.865801
'CT2005584'	2	20141104	2014	11	4	2	36009	2	200	121.2	25.1333	0.95	11.55	16.8361	16.4502
'CT2005584'	2	20141104	2014	11	4	2	36009	2	200	121.2	25.15	0.65	11.55	16.8361	11.2554
'CT2005584'	2	20141104	2014	11	4	2	36009	2	200	121.233	25.1667	0.35	11.55	16.8361	6.06061
'CT2005584'	2	20141104	2014	11	4	2	36009	2	200	121.25	25.1667	0.1	11.55	16.8361	1.7316
'CT2005584'	2	20141104	2014	11	4	2	36009	2	200	121.267	25.1667	0.7	11.55	16.8361	12.1212
'CT2005584'	2	20141104	2014	11	4	2	36009	2	200	121.283	25.1667	0.3	11.55	16.8361	5.19481
'CT2005584'	2	20141104	2014	11	4	2	36009	2	200	121.283	25.1833	0.15	11.55	16.8361	2.5974
'CT2005584'	2	20141104	2014	11	4	2	36009	2	200	121.3	25.1833	0.7	11.55	16.8361	12.1212
'CT2005584'	2	20141104	2014	11	4	2	36009	2	200	121.317	25.1833	1.2	11.55	16.8361	20.7792
'CT2005584'	2	20141104	2014	11	4	2	36009	2	200	121.333	25.1833	0.5	11.55	16.8361	8.65801
'CT2005584'	2	20141104	2014	11	4	2	36009	2	200	121.35	25.1833	0.1	11.55	16.8361	1.7316
'CT2005584'	2	20141104	2014	11	4	2	36009	2	200	121.35	25.1667	0.6	11.55	16.8361	10.3896
'CT2005584'	2	20141104	2014	11	4	2	36009	2	200	121.333	25.1667	0.65	11.55	16.8361	11.2554
'CT2005584'	2	20141104	2014	11	4	2	36009	2	200	121.183	25.15	0.1	11.55	16.8361	1.7316
'CT2005584'	2	20141104	2014	11	4	2	36009	2	200	121.183	25.1333	0.15	11.55	16.8361	2.5974
'CT2005584'	2	20141105	2014	11	5	2	36009	2	160	121.317	25.15	0.05	8.6	12.6561	0.930233
'CT2005584'	2	20141105	2014	11	5	2	36009	2	160	121.3	25.1667	0.05	8.6	12.6561	0.930233
'CT2005584'	2	20141105	2014	11	5	2	36009	2	160	121.283	25.1667	0.1	8.6	12.6561	1.86047
'CT2005584'	2	20141105	2014	11	5	2	36009	2	160	121.267	25.1833	0.45	8.6	12.6561	8.37209
'CT2005584'	2	20141105	2014	11	5	2	36009	2	160	121.25	25.1833	0.1	8.6	12.6561	1.86047
'CT2005584'	2	20141105	2014	11	5	2	36009	2	160	121.25	25.1667	0.1	8.6	12.6561	1.86047
'CT2005584'	2	20141105	2014	11	5	2	36009	2	160	121.25	25.15	0.05	8.6	12.6561	0.930233
'CT2005584'	2	20141105	2014	11	5	2	36009	2	160	121.233	25.15	0.4	8.6	12.6561	7.44186
'CT2005584'	2	20141105	2014	11	5	2	36009	2	160	121.217	25.1667	0.15	8.6	12.6561	2.7907
'CT2005584'	2	20141105	2014	11	5	2	36009	2	160	121.2	25.1667	0.4	8.6	12.6561	7.44186
'CT2005584'	2	20141105	2014	11	5	2	36009	2	160	121.2	25.15	0.2	8.6	12.6561	3.72093
'CT2005584'	2	20141105	2014	11	5	2	36009	2	160	121.183	25.15	0.2	8.6	12.6561	3.72093
'CT2005584'	2	20141105	2014	11	5	2	36009	2	160	121.183	25.1667	0.8	8.6	12.6561	14.8837
'CT2005584'	2	20141105	2014	11	5	2	36009	2	160	121.167	25.1667	1.6	8.6	12.6561	29.7674
'CT2005584'	2	20141105	2014	11	5	2	36009	2	160	121.15	25.1667	1.7	8.6	12.6561	31.6279
'CT2005584'	2	20141105	2014	11	5	2	36009	2	160	121.183	25.1833	0.15	8.6	12.6561	2.7907
'CT2005584'	2	20141105	2014	11	5	2	36009	2	160	121.267	25.2167	0.05	8.6	12.6561	0.930233
'CT2005584'	2	20141105	2014	11	5	2	36009	2	160	121.3	25.2167	0.15	8.6	12.6561	2.7907
'CT2005584'	2	20141105	2014	11	5	2	36009	2	160	121.317	25.2	0.15	8.6	12.6561	2.7907
'CT2005584'	2	20141105	2014	11	5	2	36009	2	160	121.333	25.2	0.05	8.6	12.6561	0.930233
'CT2005584'	2	20141105	2014	11	5	2	36009	2	160	121.333	25.2167	0.3	8.6	12.6561	5.5814
'CT2005584'	2	20141105	2014	11	5	2	36009	2	160	121.35	25.2167	0.6	8.6	12.6561	11.1628
'CT2005584'	2	20141105	2014	11	5	2	36009	2	160	121.367	25.2167	0.65	8.6	12.6561	12.093
'CT2005584'	2	20141105	2014	11	5	2	36009	2	160	121.367	25.2333	0.15	8.6	12.6561	2.7907
'CT2005584'	2	20141111	2014	11	11	2	36009	2	150	121.283	25.15	0.1	14.1	18.6333	1.06383
'CT2005584'	2	20141111	2014	11	11	2	36009	2	150	121.267	25.15	0.4	14.1	18.6333	4.25532
'CT2005584'	2	20141111	2014	11	11	2	36009	2	150	121.25	25.15	1.15	14.1	18.6333	12.234
'CT2005584'	2	20141111	2014	11	11	2	36009	2	150	121.25	25.1667	1.55	14.1	18.6333	16.4894
'CT2005584'	2	20141111	2014	11	11	2	36009	2	150	121.25	25.1833	0.4	14.1	18.6333	4.25532
'CT2005584'	2	20141111	2014	11	11	2	36009	2	150	121.267	25.1833	1.35	14.1	18.6333	14.3617
'CT2005584'	2	20141111	2014	11	11	2	36009	2	150	121.233	25.1667	0.3	14.1	18.6333	3.19149
'CT2005584'	2	20141111	2014	11	11	2	36009	2	150	121.217	25.1667	0.05	14.1	18.6333	0.531915
'CT2005584'	2	20141111	2014	11	11	2	36009	2	150	121.217	25.1833	0.6	14.1	18.6333	6.38298
'CT2005584'	2	20141111	2014	11	11	2	36009	2	150	121.2	25.1833	0.35	14.1	18.6333	3.7234
'CT2005584'	2	20141111	2014	11	11	2	36009	2	150	121.2	25.1667	0.2	14.1	18.6333	2.12766
'CT2005584'	2	20141111	2014	11	11	2	36009	2	150	121.183	25.1667	0.3	14.1	18.6333	3.19149
'CT2005584'	2	20141111	2014	11	11	2	36009	2	150	121.167	25.1667	1.15	14.1	18.6333	12.234
'CT2005584'	2	20141111	2014	11	11	2	36009	2	150	121.15	25.1667	0.3	14.1	18.6333	3.19149
'CT2005584'	2	20141111	2014	11	11	2	36009	2	150	121.15	25.15	0.7	14.1	18.6333	7.44681
'CT2005584'	2	20141111	2014	11	11	2	36009	2	150	121.133	25.15	2.35	14.1	18.6333	25
'CT2005584'	2	20141111	2014	11	11	2	36009	2	150	121.117	25.15	0.7	14.1	18.6333	7.44681
'CT2005584'	2	20141111	2014	11	11	2	36009	2	150	121.167	25.15	0.05	14.1	18.6333	0.531915
'CT2005584'	2	20141111	2014	11	11	2	36009	2	150	121.217	25.2	0.15	14.1	18.6333	1.59574
'CT2005584'	2	20141111	2014	11	11	2	36009	2	150	121.233	25.1833	0.05	14.1	18.6333	0.531915
'CT2005584'	2	20141111	2014	11	11	2	36009	2	150	121.25	25.2	0.55	14.1	18.6333	5.85106
'CT2005584'	2	20141111	2014	11	11	2	36009	2	150	121.267	25.2	1.35	14.1	18.6333	14.3617
'CTRTY0216'	R	20140917	2014	9	17	2	36009	2	11.5	121.117	25.1	0.85	5.75	7.9	1.7
'CTRTY0216'	R	20140917	2014	9	17	2	36009	2	11.5	121.1	25.0833	0.8	5.75	7.9	1.6
'CTRTY0216'	R	20140917	2014	9	17	2	36009	2	11.5	121.117	25.0833	1.75	5.75	7.9	3.5
'CTRTY0216'	R	20140917	2014	9	17	2	36009	2	11.5	121.133	25.1	1.2	5.75	7.9	2.4
'CTRTY0216'	R	20140917	2014	9	17	2	36009	2	11.5	121.15	25.1	0.8	5.75	7.9	1.6
'CTRTY0216'	R	20140917	2014	9	17	2	36009	2	11.5	121.167	25.1	0.3	5.75	7.9	0.6
'CTRTY0216'	R	20140917	2014	9	17	2	36009	2	11.5	121.183	25.1	0.05	5.75	7.9	0.1
'CTRTY0216'	R	20140918	2014	9	18	2	36009	2	2	121.083	25.0833	0.6	4.7	7.55	0.255319
'CTRTY0216'	R	20140918	2014	9	18	2	36009	2	2	121.083	25.0667	0.2	4.7	7.55	0.0851064
'CTRTY0216'	R	20140918	2014	9	18	2	36009	2	2	121.067	25.0667	2.1	4.7	7.55	0.893617
'CTRTY0216'	R	20140918	2014	9	18	2	36009	2	2	121.05	25.0667	0.8	4.7	7.55	0.340426
'CTRTY0216'	R	20140918	2014	9	18	2	36009	2	2	121.067	25.0833	0.15	4.7	7.55	0.0638298
'CTRTY0216'	R	20140918	2014	9	18	2	36009	2	2	121.1	25.0833	0.4	4.7	7.55	0.170213
'CTRTY0216'	R	20140918	2014	9	18	2	36009	2	2	121.117	25.0833	0.45	4.7	7.55	0.191489
'CTRTY0216'	R	20140922	2014	9	22	2	36009	2	1.7	121.15	25.1	0.05	3.25	6	0.0261538
'CTRTY0216'	R	20140922	2014	9	22	2	36009	2	1.7	121.133	25.1	0.05	3.25	6	0.0261538
'CTRTY0216'	R	20140922	2014	9	22	2	36009	2	1.7	121.133	25.1167	0.2	3.25	6	0.104615
'CTRTY0216'	R	20140922	2014	9	22	2	36009	2	1.7	121.117	25.0833	0.65	3.25	6	0.34
'CTRTY0216'	R	20140922	2014	9	22	2	36009	2	1.7	121.1	25.0833	0.25	3.25	6	0.130769
'CTRTY0216'	R	20140922	2014	9	22	2	36009	2	1.7	121.1	25.0667	0.15	3.25	6	0.0784615
'CTRTY0216'	R	20140922	2014	9	22	2	36009	2	1.7	121.083	25.0667	0.1	3.25	6	0.0523077
'CTRTY0216'	R	20140922	2014	9	22	2	36009	2	1.7	121.083	25.0833	0.7	3.25	6	0.366154
'CTRTY0216'	R	20140922	2014	9	22	2	36009	2	1.7	121.067	25.0833	0.6	3.25	6	0.313846
'CTRTY0216'	R	20140922	2014	9	22	2	36009	2	1.7	121.067	25.0667	0.5	3.25	6	0.261538
'CTRTY0216'	R	20140718	2014	7	18	42	36009	2	4.2	121.183	25.1167	0.15	4	5.8	0.1575
'CTRTY0216'	R	20140718	2014	7	18	42	36009	2	4.2	121.167	25.1167	0.15	4	5.8	0.1575
'CTRTY0216'	R	20140718	2014	7	18	42	36009	2	4.2	121.15	25.1167	0.6	4	5.8	0.63
'CTRTY0216'	R	20140718	2014	7	18	42	36009	2	4.2	121.15	25.1	0.95	4	5.8	0.9975
'CTRTY0216'	R	20140718	2014	7	18	42	36009	2	4.2	121.133	25.1	0.75	4	5.8	0.7875
'CTRTY0216'	R	20140718	2014	7	18	42	36009	2	4.2	121.133	25.0833	0.45	4	5.8	0.4725
'CTRTY0216'	R	20140718	2014	7	18	42	36009	2	4.2	121.117	25.0833	0.05	4	5.8	0.0525
'CTRTY0216'	R	20140718	2014	7	18	42	36009	2	4.2	121.083	25.0833	0.9	4	5.8	0.945
'CTRTY0216'	R	20140726	2014	7	26	42	36009	2	4.2	121.1	25.0667	3.75	3.75	5.75	4.2
'CTRTY0249'	R	20140916	2014	9	16	2	36009	2	2	121.167	25.1333	0.05	4	6.15	0.025
'CTRTY0249'	R	20140916	2014	9	16	2	36009	2	2	121.183	25.1333	0.15	4	6.15	0.075
'CTRTY0249'	R	20140916	2014	9	16	2	36009	2	2	121.217	25.1333	0.75	4	6.15	0.375
'CTRTY0249'	R	20140916	2014	9	16	2	36009	2	2	121.233	25.1333	1.45	4	6.15	0.725
'CTRTY0249'	R	20140916	2014	9	16	2	36009	2	2	121.233	25.15	0.45	4	6.15	0.225
'CTRTY0249'	R	20140916	2014	9	16	2	36009	2	2	121.217	25.15	0.1	4	6.15	0.05
'CTRTY0249'	R	20140916	2014	9	16	2	36009	2	2	121.233	25.1667	0.7	4	6.15	0.35
'CTRTY0249'	R	20140916	2014	9	16	2	36009	2	2	121.217	25.1667	0.35	4	6.15	0.175
'CTRTY0249'	R	20140922	2014	9	22	2	36009	2	3.2	121.183	25.1333	0.35	3.3	6.2	0.339394
'CTRTY0249'	R	20140922	2014	9	22	2	36009	2	3.2	121.183	25.1167	0.1	3.3	6.2	0.0969697
'CTRTY0249'	R	20140922	2014	9	22	2	36009	2	3.2	121.167	25.1333	0.05	3.3	6.2	0.0484848
'CTRTY0249'	R	20140922	2014	9	22	2	36009	2	3.2	121.167	25.1167	0.15	3.3	6.2	0.145455
'CTRTY0249'	R	20140922	2014	9	22	2	36009	2	3.2	121.15	25.1	0.15	3.3	6.2	0.145455
'CTRTY0249'	R	20140922	2014	9	22	2	36009	2	3.2	121.133	25.1	0.8	3.3	6.2	0.775758
'CTRTY0249'	R	20140922	2014	9	22	2	36009	2	3.2	121.117	25.1	1.25	3.3	6.2	1.21212
'CTRTY0249'	R	20140922	2014	9	22	2	36009	2	3.2	121.1	25.1	0.45	3.3	6.2	0.436364
'CTRTY0249'	R	20141018	2014	10	18	2	36009	2	1.5	121.167	25.1333	0.2	3.65	6.6	0.0821918
'CTRTY0249'	R	20141018	2014	10	18	2	36009	2	1.5	121.183	25.1	0.2	3.65	6.6	0.0821918
'CTRTY0249'	R	20141018	2014	10	18	2	36009	2	1.5	121.167	25.1	0.65	3.65	6.6	0.267123
'CTRTY0249'	R	20141018	2014	10	18	2	36009	2	1.5	121.15	25.1	0.35	3.65	6.6	0.143836
'CTRTY0249'	R	20141018	2014	10	18	2	36009	2	1.5	121.133	25.0833	0.25	3.65	6.6	0.10274
'CTRTY0249'	R	20141018	2014	10	18	2	36009	2	1.5	121.133	25.1	0.6	3.65	6.6	0.246575
'CTRTY0249'	R	20141018	2014	10	18	2	36009	2	1.5	121.117	25.1	0.6	3.65	6.6	0.246575
'CTRTY0249'	R	20141018	2014	10	18	2	36009	2	1.5	121.1	25.1	0.8	3.65	6.6	0.328767
'CTRTY0249'	R	20141020	2014	10	20	2	36009	2	16	121.183	25.15	0.05	6.45	8.1	0.124031
'CTRTY0249'	R	20141020	2014	10	20	2	36009	2	16	121.183	25.1333	0.1	6.45	8.1	0.248062
'CTRTY0249'	R	20141020	2014	10	20	2	36009	2	16	121.167	25.1333	1.05	6.45	8.1	2.60465
'CTRTY0249'	R	20141020	2014	10	20	2	36009	2	16	121.15	25.1333	0.8	6.45	8.1	1.9845
'CTRTY0249'	R	20141020	2014	10	20	2	36009	2	16	121.15	25.1167	0.85	6.45	8.1	2.10853
'CTRTY0249'	R	20141020	2014	10	20	2	36009	2	16	121.133	25.1167	1.7	6.45	8.1	4.21705
'CTRTY0249'	R	20141020	2014	10	20	2	36009	2	16	121.117	25.1167	1.9	6.45	8.1	4.71318
'CTRTY0257'	R	20141223	2014	12	23	2	36009	2	1.2	121.133	25.0833	0.05	5.05	9.53417	0.0118812
'CTRTY0257'	R	20141223	2014	12	23	2	36009	2	1.2	121.083	25.0833	0.2	5.05	9.53417	0.0475248
'CTRTY0257'	R	20141223	2014	12	23	2	36009	2	1.2	121.1	25.0833	0.85	5.05	9.53417	0.20198
'CTRTY0257'	R	20141223	2014	12	23	2	36009	2	1.2	121.1	25.0667	0.7	5.05	9.53417	0.166337
'CTRTY0257'	R	20141223	2014	12	23	2	36009	2	1.2	121.083	25.0667	0.4	5.05	9.53417	0.0950495
'CTRTY0257'	R	20141223	2014	12	23	2	36009	2	1.2	121.083	25.05	0.05	5.05	9.53417	0.0118812
'CTRTY0257'	R	20141223	2014	12	23	2	36009	2	1.2	121.067	25.05	0.35	5.05	9.53417	0.0831683
'CTRTY0257'	R	20141223	2014	12	23	2	36009	2	1.2	121.05	25.05	1.8	5.05	9.53417	0.427723
'CTRTY0257'	R	20141223	2014	12	23	2	36009	2	1.2	121.033	25.05	0.35	5.05	9.53417	0.0831683
'CTRTY0257'	R	20141223	2014	12	23	2	36009	2	1.2	121.033	25.0333	0.3	5.05	9.53417	0.0712871
'CTRTY0257'	R	20141108	2014	11	8	2	36009	2	9.7	121.233	25.1333	0.1	4.45	72.0397	0.217978
'CTRTY0257'	R	20141108	2014	11	8	2	36009	2	9.7	121.217	25.1333	0.05	4.45	72.0397	0.108989
'CTRTY0257'	R	20141108	2014	11	8	2	36009	2	9.7	121.217	25.1167	0.05	4.45	72.0397	0.108989
'CTRTY0257'	R	20141108	2014	11	8	2	36009	2	9.7	121.2	25.1167	0.15	4.45	72.0397	0.326966
'CTRTY0257'	R	20141108	2014	11	8	2	36009	2	9.7	121.183	25.1	0.55	4.45	72.0397	1.19888
'CTRTY0257'	R	20141108	2014	11	8	2	36009	2	9.7	121.167	25.1	0.85	4.45	72.0397	1.85281
'CTRTY0257'	R	20141108	2014	11	8	2	36009	2	9.7	121.15	25.1	0.55	4.45	72.0397	1.19888
'CTRTY0257'	R	20141108	2014	11	8	2	36009	2	9.7	121.167	25.1167	0.7	4.45	72.0397	1.52584
'CTRTY0257'	R	20141108	2014	11	8	2	36009	2	9.7	121.183	25.1167	0.2	4.45	72.0397	0.435955
'CTRTY0257'	R	20141108	2014	11	8	2	36009	2	9.7	121.167	25.1333	0.1	4.45	72.0397	0.217978
'CTRTY0257'	R	20141108	2014	11	8	2	36009	2	9.7	121.183	25.1333	0.45	4.45	72.0397	0.980899
'CTRTY0257'	R	20141108	2014	11	8	2	36009	2	9.7	121.267	25.15	0.35	4.45	72.0397	0.762921
'CTRTY0257'	R	20141108	2014	11	8	2	36009	2	9.7	121.283	25.15	0.2	4.45	72.0397	0.435955
'CTRTY0257'	R	20141108	2014	11	8	2	36009	2	9.7	121.283	25.1667	0.15	4.45	72.0397	0.326966
'CT3004194'	3	20140101	2014	1	1	2	36009	2	3	121.35	25.15	0.05	4.25	8.06611	0.0352941
'CT3004194'	3	20140101	2014	1	1	2	36009	2	3	121.333	25.1333	0.4	4.25	8.06611	0.282353
'CT3004194'	3	20140101	2014	1	1	2	36009	2	3	121.3	25.1333	0.05	4.25	8.06611	0.0352941
'CT3004194'	3	20140101	2014	1	1	2	36009	2	3	121.3	25.15	0.2	4.25	8.06611	0.141176
'CT3004194'	3	20140101	2014	1	1	2	36009	2	3	121.3	25.1667	0.05	4.25	8.06611	0.0352941
'CT3004194'	3	20140101	2014	1	1	2	36009	2	3	121.317	25.1667	0.05	4.25	8.06611	0.0352941
'CT3004194'	3	20140101	2014	1	1	2	36009	2	3	121.283	25.1667	0.25	4.25	8.06611	0.176471
'CT3004194'	3	20140101	2014	1	1	2	36009	2	3	121.267	25.1333	0.25	4.25	8.06611	0.176471
'CT3004194'	3	20140101	2014	1	1	2	36009	2	3	121.25	25.1333	0.6	4.25	8.06611	0.423529
'CT3004194'	3	20140101	2014	1	1	2	36009	2	3	121.233	25.15	0.15	4.25	8.06611	0.105882
'CT3004194'	3	20140101	2014	1	1	2	36009	2	3	121.217	25.15	0.6	4.25	8.06611	0.423529
'CT3004194'	3	20140101	2014	1	1	2	36009	2	3	121.2	25.15	0.55	4.25	8.06611	0.388235
'CT3004194'	3	20140101	2014	1	1	2	36009	2	3	121.2	25.1333	0.15	4.25	8.06611	0.105882
'CT3004194'	3	20140101	2014	1	1	2	36009	2	3	121.2	25.1167	0.35	4.25	8.06611	0.247059
'CT3004194'	3	20140101	2014	1	1	2	36009	2	3	121.233	25.1333	0.55	4.25	8.06611	0.388235
'CT3004194'	3	20140104	2014	1	4	2	36009	2	0.6	121.383	25.1667	0.05	5.45	10.0019	0.00550459
'CT3004194'	3	20140104	2014	1	4	2	36009	2	0.6	121.217	25.1167	0.15	5.45	10.0019	0.0165138
'CT3004194'	3	20140104	2014	1	4	2	36009	2	0.6	121.2	25.1167	0.1	5.45	10.0019	0.0110092
'CT3004194'	3	20140104	2014	1	4	2	36009	2	0.6	121.2	25.1333	0.4	5.45	10.0019	0.0440367
'CT3004194'	3	20140104	2014	1	4	2	36009	2	0.6	121.217	25.1333	0.4	5.45	10.0019	0.0440367
'CT3004194'	3	20140104	2014	1	4	2	36009	2	0.6	121.233	25.1333	0.05	5.45	10.0019	0.00550459
'CT3004194'	3	20140104	2014	1	4	2	36009	2	0.6	121.25	25.15	0.5	5.45	10.0019	0.0550459
'CT3004194'	3	20140104	2014	1	4	2	36009	2	0.6	121.267	25.1333	0.4	5.45	10.0019	0.0440367
'CT3004194'	3	20140104	2014	1	4	2	36009	2	0.6	121.267	25.15	1.65	5.45	10.0019	0.181651
'CT3004194'	3	20140104	2014	1	4	2	36009	2	0.6	121.283	25.15	1.1	5.45	10.0019	0.121101
'CT3004194'	3	20140104	2014	1	4	2	36009	2	0.6	121.283	25.1667	0.25	5.45	10.0019	0.0275229
'CT3004194'	3	20140104	2014	1	4	2	36009	2	0.6	121.3	25.15	0.05	5.45	10.0019	0.00550459
'CT3004194'	3	20140104	2014	1	4	2	36009	2	0.6	121.3	25.1667	0.15	5.45	10.0019	0.0165138
'CT3004194'	3	20140104	2014	1	4	2	36009	2	0.6	121.3	25.1833	0.05	5.45	10.0019	0.00550459
'CT3004194'	3	20140104	2014	1	4	2	36009	2	0.6	121.283	25.1833	0.15	5.45	10.0019	0.0165138
'CT3004194'	3	20141013	2014	10	13	2	36009	2	400	121.35	25.1833	0.95	6.8	8.66056	55.8824
'CT3004194'	3	20141013	2014	10	13	2	36009	2	400	121.333	25.1833	0.25	6.8	8.66056	14.7059
'CT3004194'	3	20141013	2014	10	13	2	36009	2	400	121.35	25.1667	0.05	6.8	8.66056	2.94118
'CT3004194'	3	20141013	2014	10	13	2	36009	2	400	121.367	25.1833	0.15	6.8	8.66056	8.82353
'CT3004194'	3	20141013	2014	10	13	2	36009	2	400	121.367	25.2	0.8	6.8	8.66056	47.0588
'CT3004194'	3	20141013	2014	10	13	2	36009	2	400	121.367	25.2167	0.3	6.8	8.66056	17.6471
'CT3004194'	3	20141013	2014	10	13	2	36009	2	400	121.367	25.2333	0.1	6.8	8.66056	5.88235
'CT3004194'	3	20141013	2014	10	13	2	36009	2	400	121.383	25.2167	0.45	6.8	8.66056	26.4706
'CT3004194'	3	20141013	2014	10	13	2	36009	2	400	121.383	25.2333	0.5	6.8	8.66056	29.4118
'CT3004194'	3	20141013	2014	10	13	2	36009	2	400	121.4	25.2333	1	6.8	8.66056	58.8235
'CT3004194'	3	20141013	2014	10	13	2	36009	2	400	121.4	25.25	1.2	6.8	8.66056	70.5882
'CT3004194'	3	20141013	2014	10	13	2	36009	2	400	121.4	25.2667	0.65	6.8	8.66056	38.2353
'CT3004194'	3	20141013	2014	10	13	2	36009	2	400	121.417	25.2667	0.4	6.8	8.66056	23.5294
'CT3004194'	3	20141014	2014	10	14	2	36009	2	200	121.383	25.1667	0.05	6.75	9.00722	1.48148
'CT3004194'	3	20141014	2014	10	14	2	36009	2	200	121.367	25.1667	0.1	6.75	9.00722	2.96296
'CT3004194'	3	20141014	2014	10	14	2	36009	2	200	121.367	25.1833	0.55	6.75	9.00722	16.2963
'CT3004194'	3	20141014	2014	10	14	2	36009	2	200	121.367	25.2	0.7	6.75	9.00722	20.7407
'CT3004194'	3	20141014	2014	10	14	2	36009	2	200	121.367	25.2167	0.1	6.75	9.00722	2.96296
'CT3004194'	3	20141014	2014	10	14	2	36009	2	200	121.367	25.2333	0.3	6.75	9.00722	8.88889
'CT3004194'	3	20141014	2014	10	14	2	36009	2	200	121.367	25.25	0.1	6.75	9.00722	2.96296
'CT3004194'	3	20141014	2014	10	14	2	36009	2	200	121.383	25.25	0.15	6.75	9.00722	4.44444
'CT3004194'	3	20141014	2014	10	14	2	36009	2	200	121.417	25.2167	0.45	6.75	9.00722	13.3333
'CT3004194'	3	20141014	2014	10	14	2	36009	2	200	121.417	25.2333	0.35	6.75	9.00722	10.3704
'CT3004194'	3	20141014	2014	10	14	2	36009	2	200	121.417	25.25	0.35	6.75	9.00722	10.3704
'CT3004194'	3	20141014	2014	10	14	2	36009	2	200	121.433	25.25	0.15	6.75	9.00722	4.44444
'CT3004194'	3	20141014	2014	10	14	2	36009	2	200	121.433	25.2667	0.25	6.75	9.00722	7.40741
'CT3004194'	3	20141014	2014	10	14	2	36009	2	200	121.433	25.2833	0.8	6.75	9.00722	23.7037
'CT3004194'	3	20141014	2014	10	14	2	36009	2	200	121.45	25.2833	1.7	6.75	9.00722	50.3704
'CT3004194'	3	20141014	2014	10	14	2	36009	2	200	121.45	25.3	0.2	6.75	9.00722	5.92593
'CT3004194'	3	20141014	2014	10	14	2	36009	2	200	121.417	25.2833	0.35	6.75	9.00722	10.3704
'CT3004194'	3	20141014	2014	10	14	2	36009	2	200	121.4	25.2833	0.1	6.75	9.00722	2.96296
'CT3004194'	3	20141015	2014	10	15	2	36009	2	200	121.35	25.1833	0.2	6.6	9.06028	6.06061
'CT3004194'	3	20141015	2014	10	15	2	36009	2	200	121.35	25.2	0.4	6.6	9.06028	12.1212
'CT3004194'	3	20141015	2014	10	15	2	36009	2	200	121.35	25.2167	0.25	6.6	9.06028	7.57576
'CT3004194'	3	20141015	2014	10	15	2	36009	2	200	121.333	25.2167	0.2	6.6	9.06028	6.06061
'CT3004194'	3	20141015	2014	10	15	2	36009	2	200	121.333	25.2333	0.5	6.6	9.06028	15.1515
'CT3004194'	3	20141015	2014	10	15	2	36009	2	200	121.333	25.25	0.3	6.6	9.06028	9.09091
'CT3004194'	3	20141015	2014	10	15	2	36009	2	200	121.35	25.2333	0.1	6.6	9.06028	3.0303
'CT3004194'	3	20141015	2014	10	15	2	36009	2	200	121.367	25.2	1	6.6	9.06028	30.303
'CT3004194'	3	20141015	2014	10	15	2	36009	2	200	121.367	25.2167	0.15	6.6	9.06028	4.54545
'CT3004194'	3	20141015	2014	10	15	2	36009	2	200	121.383	25.2167	0.3	6.6	9.06028	9.09091
'CT3004194'	3	20141015	2014	10	15	2	36009	2	200	121.383	25.2667	0.3	6.6	9.06028	9.09091
'CT3004194'	3	20141015	2014	10	15	2	36009	2	200	121.383	25.2833	0.2	6.6	9.06028	6.06061
'CT3004194'	3	20141015	2014	10	15	2	36009	2	200	121.4	25.2833	0.1	6.6	9.06028	3.0303
'CT3004194'	3	20141015	2014	10	15	2	36009	2	200	121.417	25.2667	0.55	6.6	9.06028	16.6667
'CT3004194'	3	20141015	2014	10	15	2	36009	2	200	121.433	25.2667	0.05	6.6	9.06028	1.51515
'CT3004194'	3	20141015	2014	10	15	2	36009	2	200	121.433	25.2833	0.95	6.6	9.06028	28.7879
'CT3004194'	3	20141015	2014	10	15	2	36009	2	200	121.417	25.2833	0.25	6.6	9.06028	7.57576
'CT3004194'	3	20141015	2014	10	15	2	36009	2	200	121.433	25.3	0.8	6.6	9.06028	24.2424
'CT3004194'	3	20141016	2014	10	16	2	36009	2	80	121.333	25.1667	1.6	7.15	9.21	17.9021
'CT3004194'	3	20141016	2014	10	16	2	36009	2	80	121.317	25.15	0.6	7.15	9.21	6.71329
'CT3004194'	3	20141016	2014	10	16	2	36009	2	80	121.333	25.1833	0.35	7.15	9.21	3.91608
'CT3004194'	3	20141016	2014	10	16	2	36009	2	80	121.333	25.2	0.15	7.15	9.21	1.67832
'CT3004194'	3	20141016	2014	10	16	2	36009	2	80	121.333	25.2167	0.1	7.15	9.21	1.11888
'CT3004194'	3	20141016	2014	10	16	2	36009	2	80	121.317	25.2167	0.2	7.15	9.21	2.23776
'CT3004194'	3	20141016	2014	10	16	2	36009	2	80	121.317	25.2333	0.1	7.15	9.21	1.11888
'CT3004194'	3	20141016	2014	10	16	2	36009	2	80	121.35	25.1833	0.6	7.15	9.21	6.71329
'CT3004194'	3	20141016	2014	10	16	2	36009	2	80	121.35	25.2	0.8	7.15	9.21	8.95105
'CT3004194'	3	20141016	2014	10	16	2	36009	2	80	121.35	25.2167	0.8	7.15	9.21	8.95105
'CT3004194'	3	20141016	2014	10	16	2	36009	2	80	121.35	25.2333	0.05	7.15	9.21	0.559441
'CT3004194'	3	20141016	2014	10	16	2	36009	2	80	121.367	25.2333	0.75	7.15	9.21	8.39161
'CT3004194'	3	20141016	2014	10	16	2	36009	2	80	121.367	25.25	0.45	7.15	9.21	5.03497
'CT3004194'	3	20141016	2014	10	16	2	36009	2	80	121.383	25.25	0.6	7.15	9.21	6.71329
'CT3004194'	3	20141020	2014	10	20	2	36009	2	150	121.433	25.2667	1.45	6.5	9.41111	33.4615
'CT3004194'	3	20141020	2014	10	20	2	36009	2	150	121.433	25.25	0.8	6.5	9.41111	18.4615
'CT3004194'	3	20141020	2014	10	20	2	36009	2	150	121.417	25.2833	0.15	6.5	9.41111	3.46154
'CT3004194'	3	20141020	2014	10	20	2	36009	2	150	121.4	25.25	0.05	6.5	9.41111	1.15385
'CT3004194'	3	20141020	2014	10	20	2	36009	2	150	121.4	25.2167	0.75	6.5	9.41111	17.3077
'CT3004194'	3	20141020	2014	10	20	2	36009	2	150	121.383	25.2167	1.25	6.5	9.41111	28.8462
'CT3004194'	3	20141020	2014	10	20	2	36009	2	150	121.367	25.2167	0.9	6.5	9.41111	20.7692
'CT3004194'	3	20141020	2014	10	20	2	36009	2	150	121.367	25.2333	0.55	6.5	9.41111	12.6923
'CT3004194'	3	20141020	2014	10	20	2	36009	2	150	121.367	25.25	0.6	6.5	9.41111	13.8462
'CT3004194'	3	20141023	2014	10	23	2	36009	2	100	121.2	25.15	0.15	6.8	11.0992	2.20588
'CT3004194'	3	20141023	2014	10	23	2	36009	2	100	121.217	25.1333	0.15	6.8	11.0992	2.20588
'CT3004194'	3	20141023	2014	10	23	2	36009	2	100	121.233	25.1333	0.35	6.8	11.0992	5.14706
'CT3004194'	3	20141023	2014	10	23	2	36009	2	100	121.25	25.1333	0.2	6.8	11.0992	2.94118
'CT3004194'	3	20141023	2014	10	23	2	36009	2	100	121.25	25.15	0.75	6.8	11.0992	11.0294
'CT3004194'	3	20141023	2014	10	23	2	36009	2	100	121.267	25.15	0.95	6.8	11.0992	13.9706
'CT3004194'	3	20141023	2014	10	23	2	36009	2	100	121.283	25.15	0.6	6.8	11.0992	8.82353
'CT3004194'	3	20141023	2014	10	23	2	36009	2	100	121.283	25.1667	0.9	6.8	11.0992	13.2353
'CT3004194'	3	20141023	2014	10	23	2	36009	2	100	121.3	25.1667	0.4	6.8	11.0992	5.88235
'CT3004194'	3	20141023	2014	10	23	2	36009	2	100	121.283	25.1333	0.25	6.8	11.0992	3.67647
'CT3004194'	3	20141023	2014	10	23	2	36009	2	100	121.3	25.1333	0.15	6.8	11.0992	2.20588
'CT3004194'	3	20141023	2014	10	23	2	36009	2	100	121.3	25.15	0.65	6.8	11.0992	9.55882
'CT3004194'	3	20141023	2014	10	23	2	36009	2	100	121.267	25.1333	0.55	6.8	11.0992	8.08824
'CT3004194'	3	20141023	2014	10	23	2	36009	2	100	121.233	25.15	0.3	6.8	11.0992	4.41176
'CT3004194'	3	20141023	2014	10	23	2	36009	2	100	121.217	25.15	0.45	6.8	11.0992	6.61765
'CT3004194'	3	20141027	2014	10	27	2	36009	2	80	121.367	25.1833	0.2	3.1	3.98222	5.16129
'CT3004194'	3	20141027	2014	10	27	2	36009	2	80	121.367	25.2	0.5	3.1	3.98222	12.9032
'CT3004194'	3	20141027	2014	10	27	2	36009	2	80	121.367	25.2167	0.95	3.1	3.98222	24.5161
'CT3004194'	3	20141027	2014	10	27	2	36009	2	80	121.383	25.2	1.3	3.1	3.98222	33.5484
'CT3004194'	3	20141027	2014	10	27	2	36009	2	80	121.383	25.2167	0.15	3.1	3.98222	3.87097
'CT3004194'	3	20141105	2014	11	5	2	36009	2	140	121.233	25.1333	0.05	8.7	13.0925	0.804598
'CT3004194'	3	20141105	2014	11	5	2	36009	2	140	121.233	25.15	0.3	8.7	13.0925	4.82759
'CT3004194'	3	20141105	2014	11	5	2	36009	2	140	121.233	25.1667	2	8.7	13.0925	32.1839
'CT3004194'	3	20141105	2014	11	5	2	36009	2	140	121.25	25.15	0.2	8.7	13.0925	3.21839
'CT3004194'	3	20141105	2014	11	5	2	36009	2	140	121.267	25.15	0.85	8.7	13.0925	13.6782
'CT3004194'	3	20141105	2014	11	5	2	36009	2	140	121.283	25.15	0.1	8.7	13.0925	1.6092
'CT3004194'	3	20141105	2014	11	5	2	36009	2	140	121.283	25.1667	0.4	8.7	13.0925	6.43678
'CT3004194'	3	20141105	2014	11	5	2	36009	2	140	121.3	25.1667	0.95	8.7	13.0925	15.2874
'CT3004194'	3	20141105	2014	11	5	2	36009	2	140	121.3	25.1833	1.15	8.7	13.0925	18.5057
'CT3004194'	3	20141105	2014	11	5	2	36009	2	140	121.3	25.15	0.35	8.7	13.0925	5.63218
'CT3004194'	3	20141105	2014	11	5	2	36009	2	140	121.3	25.1333	0.6	8.7	13.0925	9.65517
'CT3004194'	3	20141105	2014	11	5	2	36009	2	140	121.317	25.1667	0.2	8.7	13.0925	3.21839
'CT3004194'	3	20141105	2014	11	5	2	36009	2	140	121.317	25.15	0.05	8.7	13.0925	0.804598
'CT3004194'	3	20141105	2014	11	5	2	36009	2	140	121.3	25.2	0.05	8.7	13.0925	0.804598
'CT3004194'	3	20141105	2014	11	5	2	36009	2	140	121.283	25.1833	0.1	8.7	13.0925	1.6092
'CT3004194'	3	20141105	2014	11	5	2	36009	2	140	121.217	25.1333	0.75	8.7	13.0925	12.069
'CT3004194'	3	20141105	2014	11	5	2	36009	2	140	121.2	25.1333	0.05	8.7	13.0925	0.804598
'CT3004194'	3	20141105	2014	11	5	2	36009	2	140	121.25	25.1667	0.55	8.7	13.0925	8.85057
'CT3004194'	3	20141111	2014	11	11	2	36009	2	150	121.35	25.1833	0.05	6.35	9.80556	1.1811
'CT3004194'	3	20141111	2014	11	11	2	36009	2	150	121.35	25.1667	0.8	6.35	9.80556	18.8976
'CT3004194'	3	20141111	2014	11	11	2	36009	2	150	121.367	25.1667	0.2	6.35	9.80556	4.72441
'CT3004194'	3	20141111	2014	11	11	2	36009	2	150	121.367	25.1833	0.9	6.35	9.80556	21.2598
'CT3004194'	3	20141111	2014	11	11	2	36009	2	150	121.383	25.2	0.2	6.35	9.80556	4.72441
'CT3004194'	3	20141111	2014	11	11	2	36009	2	150	121.383	25.25	0.05	6.35	9.80556	1.1811
'CT3004194'	3	20141111	2014	11	11	2	36009	2	150	121.4	25.2667	1.15	6.35	9.80556	27.1654
'CT3004194'	3	20141111	2014	11	11	2	36009	2	150	121.4	25.2833	0.15	6.35	9.80556	3.54331
'CT3004194'	3	20141111	2014	11	11	2	36009	2	150	121.4	25.25	0.2	6.35	9.80556	4.72441
'CT3004194'	3	20141111	2014	11	11	2	36009	2	150	121.4	25.2167	0.75	6.35	9.80556	17.7165
'CT3004194'	3	20141111	2014	11	11	2	36009	2	150	121.4	25.2333	0.25	6.35	9.80556	5.90551
'CT3004194'	3	20141111	2014	11	11	2	36009	2	150	121.417	25.25	0.75	6.35	9.80556	17.7165
'CT3004194'	3	20141111	2014	11	11	2	36009	2	150	121.383	25.2667	0.8	6.35	9.80556	18.8976
'CT3004194'	3	20141111	2014	11	11	2	36009	2	150	121.367	25.2667	0.1	6.35	9.80556	2.3622
'CT3004194'	3	20141203	2014	12	3	2	36009	2	100	121.233	25.15	0.1	8.5	11.7967	1.17647
'CT3004194'	3	20141203	2014	12	3	2	36009	2	100	121.233	25.1667	0.05	8.5	11.7967	0.588235
'CT3004194'	3	20141203	2014	12	3	2	36009	2	100	121.267	25.1667	0.25	8.5	11.7967	2.94118
'CT3004194'	3	20141203	2014	12	3	2	36009	2	100	121.267	25.15	0.8	8.5	11.7967	9.41176
'CT3004194'	3	20141203	2014	12	3	2	36009	2	100	121.283	25.1667	0.4	8.5	11.7967	4.70588
'CT3004194'	3	20141203	2014	12	3	2	36009	2	100	121.3	25.1833	0.8	8.5	11.7967	9.41176
'CT3004194'	3	20141203	2014	12	3	2	36009	2	100	121.3	25.1667	0.35	8.5	11.7967	4.11765
'CT3004194'	3	20141203	2014	12	3	2	36009	2	100	121.3	25.15	2.25	8.5	11.7967	26.4706
'CT3004194'	3	20141203	2014	12	3	2	36009	2	100	121.3	25.1333	0.45	8.5	11.7967	5.29412
'CT3004194'	3	20141203	2014	12	3	2	36009	2	100	121.317	25.1333	0.2	8.5	11.7967	2.35294
'CT3004194'	3	20141203	2014	12	3	2	36009	2	100	121.283	25.1833	0.05	8.5	11.7967	0.588235
'CT3004194'	3	20141203	2014	12	3	2	36009	2	100	121.283	25.15	0.05	8.5	11.7967	0.588235
'CT3004194'	3	20141203	2014	12	3	2	36009	2	100	121.267	25.1333	0.65	8.5	11.7967	7.64706
'CT3004194'	3	20141203	2014	12	3	2	36009	2	100	121.283	25.1333	0.4	8.5	11.7967	4.70588
'CT3004194'	3	20141203	2014	12	3	2	36009	2	100	121.25	25.15	0.75	8.5	11.7967	8.82353
'CT3004194'	3	20141203	2014	12	3	2	36009	2	100	121.25	25.1667	0.7	8.5	11.7967	8.23529
'CT3004194'	3	20141203	2014	12	3	2	36009	2	100	121.267	25.1833	0.25	8.5	11.7967	2.94118
'CT3005620'	3	20141110	2014	11	10	2	36009	2	6	121.4	25.2167	0.75	1.7	38.0319	2.64706
'CT3005620'	3	20141110	2014	11	10	2	36009	2	6	121.417	25.2	0.25	1.7	38.0319	0.882353
'CT3005620'	3	20141110	2014	11	10	2	36009	2	6	121.4	25.2	0.25	1.7	38.0319	0.882353
'CT3005620'	3	20141110	2014	11	10	2	36009	2	6	121.417	25.2167	0.4	1.7	38.0319	1.41176
'CT3005620'	3	20141110	2014	11	10	2	36009	2	6	121.417	25.2333	0.05	1.7	38.0319	0.176471
'CTRTY0239'	R	20141020	2014	10	20	2	36009	2	9.5	121.2	25.1167	0.2	4.75	24.35	0.4
'CTRTY0239'	R	20141020	2014	10	20	2	36009	2	9.5	121.117	25.0833	1.05	4.75	24.35	2.1
'CTRTY0239'	R	20141020	2014	10	20	2	36009	2	9.5	121.117	25.0667	0.9	4.75	24.35	1.8
'CTRTY0239'	R	20141020	2014	10	20	2	36009	2	9.5	121.15	25.0833	0.55	4.75	24.35	1.1
'CTRTY0239'	R	20141020	2014	10	20	2	36009	2	9.5	121.167	25.0833	0.25	4.75	24.35	0.5
'CTRTY0239'	R	20141020	2014	10	20	2	36009	2	9.5	121.167	25.1	1.2	4.75	24.35	2.4
'CTRTY0239'	R	20141020	2014	10	20	2	36009	2	9.5	121.183	25.1	0.35	4.75	24.35	0.7
'CTRTY0239'	R	20141020	2014	10	20	2	36009	2	9.5	121.183	25.1167	0.25	4.75	24.35	0.5
'CTRTY0239'	R	20140928	2014	9	28	61	36009	2	4.2	121.233	25.1167	0.15	1.75	2.5	0.36
'CTRTY0239'	R	20140928	2014	9	28	61	36009	2	4.2	121.217	25.1167	0.9	1.75	2.5	2.16
'CTRTY0239'	R	20140928	2014	9	28	61	36009	2	4.2	121.217	25.1	0.65	1.75	2.5	1.56
'CTRTY0239'	R	20140928	2014	9	28	61	36009	2	4.2	121.233	25.1	0.05	1.75	2.5	0.12
'CTRTY0265'	R	20140907	2014	9	7	2	36009	2	13.5	121.217	25.1333	0.1	3.85	6.055	0.350649
'CTRTY0265'	R	20140907	2014	9	7	2	36009	2	13.5	121.2	25.1333	0.3	3.85	6.055	1.05195
'CTRTY0265'	R	20140907	2014	9	7	2	36009	2	13.5	121.183	25.1333	0.15	3.85	6.055	0.525974
'CTRTY0265'	R	20140907	2014	9	7	2	36009	2	13.5	121.167	25.1333	0.25	3.85	6.055	0.876623
'CTRTY0265'	R	20140907	2014	9	7	2	36009	2	13.5	121.183	25.1167	0.3	3.85	6.055	1.05195
'CTRTY0265'	R	20140907	2014	9	7	2	36009	2	13.5	121.167	25.1167	0.3	3.85	6.055	1.05195
'CTRTY0265'	R	20140907	2014	9	7	2	36009	2	13.5	121.15	25.1167	2.45	3.85	6.055	8.59091
'CTRTY0265'	R	20140917	2014	9	17	2	36009	2	4	121.15	25.1	0.1	2.9	5.44667	0.137931
'CTRTY0265'	R	20140917	2014	9	17	2	36009	2	4	121.133	25.1	2.8	2.9	5.44667	3.86207
'CTRTY0364'	R	20141018	2014	10	18	2	36009	2	4	121.217	25.1167	0.55	2.25	16	0.977778
'CTRTY0364'	R	20141018	2014	10	18	2	36009	2	4	121.2	25.1167	1.15	2.25	16	2.04444
'CTRTY0364'	R	20141018	2014	10	18	2	36009	2	4	121.2	25.1	0.55	2.25	16	0.977778
'CTRTY0412'	R	20140627	2014	6	27	2	36009	2	0.8	121.183	25.1333	0.05	2.75	4.09639	0.0145455
'CTRTY0412'	R	20140627	2014	6	27	2	36009	2	0.8	121.183	25.1167	0.1	2.75	4.09639	0.0290909
'CTRTY0412'	R	20140627	2014	6	27	2	36009	2	0.8	121.167	25.1167	0.6	2.75	4.09639	0.174545
'CTRTY0412'	R	20140627	2014	6	27	2	36009	2	0.8	121.15	25.1167	0.3	2.75	4.09639	0.0872727
'CTRTY0412'	R	20140627	2014	6	27	2	36009	2	0.8	121.15	25.1	0.5	2.75	4.09639	0.145455
'CTRTY0412'	R	20140627	2014	6	27	2	36009	2	0.8	121.133	25.1	0.6	2.75	4.09639	0.174545
'CTRTY0412'	R	20140627	2014	6	27	2	36009	2	0.8	121.117	25.1	0.6	2.75	4.09639	0.174545
'CTRTY0412'	R	20140906	2014	9	6	2	36009	2	3	121.167	25.1	0.05	6.9	14.4858	0.0217391
'CTRTY0412'	R	20140906	2014	9	6	2	36009	2	3	121.15	25.1	1.6	6.9	14.4858	0.695652
'CTRTY0412'	R	20140906	2014	9	6	2	36009	2	3	121.15	25.0833	2.1	6.9	14.4858	0.913043
'CTRTY0412'	R	20140906	2014	9	6	2	36009	2	3	121.133	25.1	0.4	6.9	14.4858	0.173913
'CTRTY0412'	R	20140906	2014	9	6	2	36009	2	3	121.117	25.1	0.35	6.9	14.4858	0.152174
'CTRTY0412'	R	20140906	2014	9	6	2	36009	2	3	121.117	25.0833	0.4	6.9	14.4858	0.173913
'CTRTY0412'	R	20140906	2014	9	6	2	36009	2	3	121.1	25.0833	0.55	6.9	14.4858	0.23913
'CTRTY0412'	R	20140906	2014	9	6	2	36009	2	3	121.083	25.0833	0.05	6.9	14.4858	0.0217391
'CTRTY0412'	R	20140906	2014	9	6	2	36009	2	3	121.083	25.0667	0.6	6.9	14.4858	0.26087
'CTRTY0412'	R	20140906	2014	9	6	2	36009	2	3	121.067	25.0667	0.6	6.9	14.4858	0.26087
'CTRTY0412'	R	20140906	2014	9	6	2	36009	2	3	121.067	25.0833	0.2	6.9	14.4858	0.0869565
'CTRTY0412'	R	20140908	2014	9	8	2	36009	2	1	121.167	25.1167	0.1	3.65	6.69417	0.0273973
'CTRTY0412'	R	20140908	2014	9	8	2	36009	2	1	121.15	25.1	0.3	3.65	6.69417	0.0821918
'CTRTY0412'	R	20140908	2014	9	8	2	36009	2	1	121.15	25.0833	0.15	3.65	6.69417	0.0410959
'CTRTY0412'	R	20140908	2014	9	8	2	36009	2	1	121.133	25.0833	0.5	3.65	6.69417	0.136986
'CTRTY0412'	R	20140908	2014	9	8	2	36009	2	1	121.117	25.0833	0.1	3.65	6.69417	0.0273973
'CTRTY0412'	R	20140908	2014	9	8	2	36009	2	1	121.1	25.0833	0.5	3.65	6.69417	0.136986
'CTRTY0412'	R	20140908	2014	9	8	2	36009	2	1	121.083	25.0833	0.4	3.65	6.69417	0.109589
'CTRTY0412'	R	20140908	2014	9	8	2	36009	2	1	121.083	25.0667	0.2	3.65	6.69417	0.0547945
'CTRTY0412'	R	20140908	2014	9	8	2	36009	2	1	121.067	25.0667	0.35	3.65	6.69417	0.0958904
'CTRTY0412'	R	20140908	2014	9	8	2	36009	2	1	121.05	25.05	0.35	3.65	6.69417	0.0958904
'CTRTY0412'	R	20140908	2014	9	8	2	36009	2	1	121.033	25.05	0.3	3.65	6.69417	0.0821918
'CTRTY0412'	R	20140908	2014	9	8	2	36009	2	1	121.017	25.05	0.4	3.65	6.69417	0.109589
'CTRTY0412'	R	20140917	2014	9	17	2	36009	2	4.5	121.2	25.1167	0.05	7.9	21.2786	0.028481
'CTRTY0412'	R	20140917	2014	9	17	2	36009	2	4.5	121.2	25.1333	0.05	7.9	21.2786	0.028481
'CTRTY0412'	R	20140917	2014	9	17	2	36009	2	4.5	121.183	25.1333	1.1	7.9	21.2786	0.626582
'CTRTY0412'	R	20140917	2014	9	17	2	36009	2	4.5	121.183	25.1167	0.45	7.9	21.2786	0.256329
'CTRTY0412'	R	20140917	2014	9	17	2	36009	2	4.5	121.167	25.1167	0.15	7.9	21.2786	0.085443
'CTRTY0412'	R	20140917	2014	9	17	2	36009	2	4.5	121.167	25.1	0.5	7.9	21.2786	0.28481
'CTRTY0412'	R	20140917	2014	9	17	2	36009	2	4.5	121.15	25.1	0.9	7.9	21.2786	0.512658
'CTRTY0412'	R	20140917	2014	9	17	2	36009	2	4.5	121.15	25.1167	0.5	7.9	21.2786	0.28481
'CTRTY0412'	R	20140917	2014	9	17	2	36009	2	4.5	121.133	25.1	0.4	7.9	21.2786	0.227848
'CTRTY0412'	R	20140917	2014	9	17	2	36009	2	4.5	121.133	25.0833	0.15	7.9	21.2786	0.085443
'CTRTY0412'	R	20140917	2014	9	17	2	36009	2	4.5	121.117	25.0833	1.95	7.9	21.2786	1.11076
'CTRTY0412'	R	20140917	2014	9	17	2	36009	2	4.5	121.1	25.0833	1.2	7.9	21.2786	0.683544
'CTRTY0412'	R	20140917	2014	9	17	2	36009	2	4.5	121.117	25.1	0.5	7.9	21.2786	0.28481
'CTRTY0412'	R	20140922	2014	9	22	2	36009	2	1.5	121.167	25.1167	0.1	3.95	6.09222	0.0379747
'CTRTY0412'	R	20140922	2014	9	22	2	36009	2	1.5	121.167	25.1333	0.1	3.95	6.09222	0.0379747
'CTRTY0412'	R	20140922	2014	9	22	2	36009	2	1.5	121.15	25.1	0.65	3.95	6.09222	0.246835
'CTRTY0412'	R	20140922	2014	9	22	2	36009	2	1.5	121.133	25.0833	0.6	3.95	6.09222	0.227848
'CTRTY0412'	R	20140922	2014	9	22	2	36009	2	1.5	121.117	25.0833	1.05	3.95	6.09222	0.398734
'CTRTY0412'	R	20140922	2014	9	22	2	36009	2	1.5	121.1	25.0833	1.35	3.95	6.09222	0.512658
'CTRTY0412'	R	20140922	2014	9	22	2	36009	2	1.5	121.1	25.1	0.1	3.95	6.09222	0.0379747
'CTRTY0412'	R	20140923	2014	9	23	2	36009	2	4	121.133	25.0833	0.05	4.45	7.44472	0.0449438
'CTRTY0412'	R	20140923	2014	9	23	2	36009	2	4	121.133	25.1	0.05	4.45	7.44472	0.0449438
'CTRTY0412'	R	20140923	2014	9	23	2	36009	2	4	121.117	25.1167	0.05	4.45	7.44472	0.0449438
'CTRTY0412'	R	20140923	2014	9	23	2	36009	2	4	121.117	25.0833	0.6	4.45	7.44472	0.539326
'CTRTY0412'	R	20140923	2014	9	23	2	36009	2	4	121.1	25.0833	0.45	4.45	7.44472	0.404494
'CTRTY0412'	R	20140923	2014	9	23	2	36009	2	4	121.1	25.0667	0.2	4.45	7.44472	0.179775
'CTRTY0412'	R	20140923	2014	9	23	2	36009	2	4	121.083	25.0667	0.7	4.45	7.44472	0.629213
'CTRTY0412'	R	20140923	2014	9	23	2	36009	2	4	121.067	25.0667	0.2	4.45	7.44472	0.179775
'CTRTY0412'	R	20140923	2014	9	23	2	36009	2	4	121.067	25.05	0.15	4.45	7.44472	0.134831
'CTRTY0412'	R	20140923	2014	9	23	2	36009	2	4	121.05	25.05	0.55	4.45	7.44472	0.494382
'CTRTY0412'	R	20140923	2014	9	23	2	36009	2	4	121.033	25.05	0.25	4.45	7.44472	0.224719
'CTRTY0412'	R	20140923	2014	9	23	2	36009	2	4	121.017	25.05	1.2	4.45	7.44472	1.07865
'CTRTY0412'	R	20140924	2014	9	24	2	36009	2	2	121.2	25.1333	1	2.9	5.7925	0.689655
'CTRTY0412'	R	20140924	2014	9	24	2	36009	2	2	121.2	25.15	0.3	2.9	5.7925	0.206897
'CTRTY0412'	R	20140924	2014	9	24	2	36009	2	2	121.217	25.15	0.05	2.9	5.7925	0.0344828
'CTRTY0412'	R	20140924	2014	9	24	2	36009	2	2	121.25	25.1667	0.05	2.9	5.7925	0.0344828
'CTRTY0412'	R	20140924	2014	9	24	2	36009	2	2	121.267	25.1667	0.25	2.9	5.7925	0.172414
'CTRTY0412'	R	20140924	2014	9	24	2	36009	2	2	121.283	25.1833	0.4	2.9	5.7925	0.275862
'CTRTY0412'	R	20140924	2014	9	24	2	36009	2	2	121.3	25.1667	0.85	2.9	5.7925	0.586207
'CTRTY0412'	R	20141023	2014	10	23	2	36009	2	7.5	121.183	25.1333	0.1	1.45	6.23778	0.517241
'CTRTY0412'	R	20141023	2014	10	23	2	36009	2	7.5	121.183	25.1167	0.25	1.45	6.23778	1.2931
'CTRTY0412'	R	20141023	2014	10	23	2	36009	2	7.5	121.167	25.1167	0.05	1.45	6.23778	0.258621
'CTRTY0412'	R	20141023	2014	10	23	2	36009	2	7.5	121.167	25.1	0.2	1.45	6.23778	1.03448
'CTRTY0412'	R	20141023	2014	10	23	2	36009	2	7.5	121.15	25.1	0.05	1.45	6.23778	0.258621
'CTRTY0412'	R	20141023	2014	10	23	2	36009	2	7.5	121.117	25.0833	0.15	1.45	6.23778	0.775862
'CTRTY0412'	R	20141023	2014	10	23	2	36009	2	7.5	121.1	25.0833	0.2	1.45	6.23778	1.03448
'CTRTY0412'	R	20141023	2014	10	23	2	36009	2	7.5	121.083	25.0833	0.2	1.45	6.23778	1.03448
'CTRTY0412'	R	20141023	2014	10	23	2	36009	2	7.5	121.067	25.0833	0.05	1.45	6.23778	0.258621
'CTRTY0412'	R	20141023	2014	10	23	2	36009	2	7.5	121.067	25.0667	0.2	1.45	6.23778	1.03448
'CTRTY0412'	R	20141025	2014	10	25	2	36009	2	1.2	121.2	25.1167	0.15	5.7	8.98306	0.0315789
'CTRTY0412'	R	20141025	2014	10	25	2	36009	2	1.2	121.183	25.1333	0.2	5.7	8.98306	0.0421053
'CTRTY0412'	R	20141025	2014	10	25	2	36009	2	1.2	121.183	25.1167	0.1	5.7	8.98306	0.0210526
'CTRTY0412'	R	20141025	2014	10	25	2	36009	2	1.2	121.167	25.1333	0.05	5.7	8.98306	0.0105263
'CTRTY0412'	R	20141025	2014	10	25	2	36009	2	1.2	121.167	25.1167	0.1	5.7	8.98306	0.0210526
'CTRTY0412'	R	20141025	2014	10	25	2	36009	2	1.2	121.15	25.1	0.25	5.7	8.98306	0.0526316
'CTRTY0412'	R	20141025	2014	10	25	2	36009	2	1.2	121.133	25.1	0.35	5.7	8.98306	0.0736842
'CTRTY0412'	R	20141025	2014	10	25	2	36009	2	1.2	121.133	25.0833	0.25	5.7	8.98306	0.0526316
'CTRTY0412'	R	20141025	2014	10	25	2	36009	2	1.2	121.117	25.0833	0.55	5.7	8.98306	0.115789
'CTRTY0412'	R	20141025	2014	10	25	2	36009	2	1.2	121.1	25.0833	0.75	5.7	8.98306	0.157895
'CTRTY0412'	R	20141025	2014	10	25	2	36009	2	1.2	121.083	25.0833	0.85	5.7	8.98306	0.178947
'CTRTY0412'	R	20141025	2014	10	25	2	36009	2	1.2	121.083	25.0667	0.25	5.7	8.98306	0.0526316
'CTRTY0412'	R	20141025	2014	10	25	2	36009	2	1.2	121.067	25.0667	0.75	5.7	8.98306	0.157895
'CTRTY0412'	R	20141025	2014	10	25	2	36009	2	1.2	121.067	25.0833	1.1	5.7	8.98306	0.231579
'CTRTY0412'	R	20141026	2014	10	26	2	36009	2	1.5	121.217	25.15	0.05	3.05	4.54111	0.0245902
'CTRTY0412'	R	20141026	2014	10	26	2	36009	2	1.5	121.233	25.1333	1.85	3.05	4.54111	0.909836
'CTRTY0412'	R	20141026	2014	10	26	2	36009	2	1.5	121.217	25.1333	0.65	3.05	4.54111	0.319672
'CTRTY0412'	R	20141026	2014	10	26	2	36009	2	1.5	121.2	25.1333	0.5	3.05	4.54111	0.245902
'CTRTY0412'	R	20141111	2014	11	11	2	36009	2	1	121.183	25.1	0.05	5.15	18.1167	0.00970874
'CTRTY0412'	R	20141111	2014	11	11	2	36009	2	1	121.167	25.1	0.8	5.15	18.1167	0.15534
'CTRTY0412'	R	20141111	2014	11	11	2	36009	2	1	121.15	25.1	0.4	5.15	18.1167	0.0776699
'CTRTY0412'	R	20141111	2014	11	11	2	36009	2	1	121.133	25.1	0.1	5.15	18.1167	0.0194175
'CTRTY0412'	R	20141111	2014	11	11	2	36009	2	1	121.133	25.0833	0.1	5.15	18.1167	0.0194175
'CTRTY0412'	R	20141111	2014	11	11	2	36009	2	1	121.117	25.0833	0.85	5.15	18.1167	0.165049
'CTRTY0412'	R	20141111	2014	11	11	2	36009	2	1	121.1	25.0833	0.9	5.15	18.1167	0.174757
'CTRTY0412'	R	20141111	2014	11	11	2	36009	2	1	121.15	25.1167	0.15	5.15	18.1167	0.0291262
'CTRTY0412'	R	20141111	2014	11	11	2	36009	2	1	121.083	25.0833	0.6	5.15	18.1167	0.116505
'CTRTY0412'	R	20141111	2014	11	11	2	36009	2	1	121.067	25.0833	1.05	5.15	18.1167	0.203883
'CTRTY0412'	R	20141111	2014	11	11	2	36009	2	1	121.05	25.0833	0.15	5.15	18.1167	0.0291262
'CT2005688'	2	20141020	2014	10	20	2	36009	2	200	121.333	25.15	0.25	4.65	8.5	10.7527
'CT2005688'	2	20141020	2014	10	20	2	36009	2	200	121.333	25.1667	0.05	4.65	8.5	2.15054
'CT2005688'	2	20141020	2014	10	20	2	36009	2	200	121.317	25.1667	0.1	4.65	8.5	4.30108
'CT2005688'	2	20141020	2014	10	20	2	36009	2	200	121.3	25.15	0.2	4.65	8.5	8.60215
'CT2005688'	2	20141020	2014	10	20	2	36009	2	200	121.283	25.15	1.25	4.65	8.5	53.7634
'CT2005688'	2	20141020	2014	10	20	2	36009	2	200	121.283	25.1667	0.45	4.65	8.5	19.3548
'CT2005688'	2	20141020	2014	10	20	2	36009	2	200	121.25	25.15	0.5	4.65	8.5	21.5054
'CT2005688'	2	20141020	2014	10	20	2	36009	2	200	121.25	25.1667	0.6	4.65	8.5	25.8065
'CT2005688'	2	20141020	2014	10	20	2	36009	2	200	121.317	25.1333	0.7	4.65	8.5	30.1075
'CT2005688'	2	20141020	2014	10	20	2	36009	2	200	121.317	25.15	0.55	4.65	8.5	23.6559
'CT2005688'	2	20141021	2014	10	21	2	36009	2	120	121.333	25.15	0.1	3.25	6.2	3.69231
'CT2005688'	2	20141021	2014	10	21	2	36009	2	120	121.333	25.1667	0.05	3.25	6.2	1.84615
'CT2005688'	2	20141021	2014	10	21	2	36009	2	120	121.317	25.1667	0.2	3.25	6.2	7.38462
'CT2005688'	2	20141021	2014	10	21	2	36009	2	120	121.317	25.15	0.35	3.25	6.2	12.9231
'CT2005688'	2	20141021	2014	10	21	2	36009	2	120	121.3	25.15	0.45	3.25	6.2	16.6154
'CT2005688'	2	20141021	2014	10	21	2	36009	2	120	121.3	25.1333	0.25	3.25	6.2	9.23077
'CT2005688'	2	20141021	2014	10	21	2	36009	2	120	121.283	25.15	0.7	3.25	6.2	25.8462
'CT2005688'	2	20141021	2014	10	21	2	36009	2	120	121.267	25.1667	0.5	3.25	6.2	18.4615
'CT2005688'	2	20141021	2014	10	21	2	36009	2	120	121.267	25.15	0.65	3.25	6.2	24
'CT2005688'	2	20141024	2014	10	24	2	36009	2	100	121.317	25.15	0.1	3.3	6.35	3.0303
'CT2005688'	2	20141024	2014	10	24	2	36009	2	100	121.3	25.15	0.05	3.3	6.35	1.51515
'CT2005688'	2	20141024	2014	10	24	2	36009	2	100	121.267	25.15	0.05	3.3	6.35	1.51515
'CT2005688'	2	20141024	2014	10	24	2	36009	2	100	121.283	25.15	0.1	3.3	6.35	3.0303
'CT2005688'	2	20141024	2014	10	24	2	36009	2	100	121.283	25.1333	0.4	3.3	6.35	12.1212
'CT2005688'	2	20141024	2014	10	24	2	36009	2	100	121.267	25.1333	0.75	3.3	6.35	22.7273
'CT2005688'	2	20141024	2014	10	24	2	36009	2	100	121.25	25.1333	0.4	3.3	6.35	12.1212
'CT2005688'	2	20141024	2014	10	24	2	36009	2	100	121.233	25.1333	0.1	3.3	6.35	3.0303
'CT2005688'	2	20141024	2014	10	24	2	36009	2	100	121.233	25.15	1.1	3.3	6.35	33.3333
'CT2005688'	2	20141024	2014	10	24	2	36009	2	100	121.233	25.1667	0.25	3.3	6.35	7.57576
'CT2005688'	2	20141104	2014	11	4	2	36009	2	60	121.367	25.1667	0.45	1.55	2.55	17.4194
'CT2005688'	2	20141104	2014	11	4	2	36009	2	60	121.383	25.1667	0.4	1.55	2.55	15.4839
'CT2005688'	2	20141104	2014	11	4	2	36009	2	60	121.367	25.1833	0.05	1.55	2.55	1.93548
'CT2005688'	2	20141104	2014	11	4	2	36009	2	60	121.383	25.1833	0.35	1.55	2.55	13.5484
'CT2005688'	2	20141104	2014	11	4	2	36009	2	60	121.4	25.1833	0.2	1.55	2.55	7.74194
'CT2005688'	2	20141104	2014	11	4	2	36009	2	60	121.4	25.2	0.1	1.55	2.55	3.87097
'CT2005688'	2	20141105	2014	11	5	2	36009	2	22	121.317	25.15	0.15	3.3	6.4	1
'CT2005688'	2	20141105	2014	11	5	2	36009	2	22	121.317	25.1667	0.1	3.3	6.4	0.666667
'CT2005688'	2	20141105	2014	11	5	2	36009	2	22	121.3	25.1833	0.05	3.3	6.4	0.333333
'CT2005688'	2	20141105	2014	11	5	2	36009	2	22	121.283	25.1667	0.05	3.3	6.4	0.333333
'CT2005688'	2	20141105	2014	11	5	2	36009	2	22	121.283	25.15	0.15	3.3	6.4	1
'CT2005688'	2	20141105	2014	11	5	2	36009	2	22	121.267	25.15	0.1	3.3	6.4	0.666667
'CT2005688'	2	20141105	2014	11	5	2	36009	2	22	121.283	25.1333	0.05	3.3	6.4	0.333333
'CT2005688'	2	20141105	2014	11	5	2	36009	2	22	121.267	25.1333	0.4	3.3	6.4	2.66667
'CT2005688'	2	20141105	2014	11	5	2	36009	2	22	121.25	25.1333	0.5	3.3	6.4	3.33333
'CT2005688'	2	20141105	2014	11	5	2	36009	2	22	121.233	25.1333	0.25	3.3	6.4	1.66667
'CT2005688'	2	20141105	2014	11	5	2	36009	2	22	121.233	25.15	0.3	3.3	6.4	2
'CT2005688'	2	20141105	2014	11	5	2	36009	2	22	121.217	25.15	0.7	3.3	6.4	4.66667
'CT2005688'	2	20141105	2014	11	5	2	36009	2	22	121.2	25.15	0.5	3.3	6.4	3.33333
'CT2005688'	2	20141106	2014	11	6	2	36009	2	100	121.183	25.15	1.15	3	8.8	38.3333
'CT2005688'	2	20141106	2014	11	6	2	36009	2	100	121.2	25.15	0.75	3	8.8	25
[truncated: 174,408 more rows]
